# Supplementary material for: Multiomics-Based Signaling Pathway Network Alterations in Human Non-functional Pituitary Adenomas
Source: Front Endocrinol (Lausanne). 2019 Dec 17;10:835. doi: 10.3389/fendo.2019.00835 (PMC6928143; doi:10.3389/fendo.2019.00835)

**Supplemental materials 8.3**  
**Statistically significant canonical pathways derived from nitroproteins from a pituitary control for  
IPA analysis (Dataset 8)**

1. Cellular effects of sildenafil (Viagra)
2. Gap junction signaling
3. Mechanisms of viral exit from host cells
4. Sertoli cell-sertoli cell junction signaling
5. Clathrin-mediated endocytosis signaling
6. MSP-RON signaling pathway
7. Remodeling of epithelial adherens junctions
8. Agrin interactions at neuromuscular junction
9. Caveolar-mediated endocytosis signaling
10. Crosstalk between dendritic cells and natural killer cells
11. FAK signaling
12. Death receptor signaling
13. Regulation of actin-based motility by Rho
14. Virus entry via endocytic pathways
15. VEGF signaling
16. Fcγ receptor-mediated phagocytosis in macrophages and monocytes
17. Paxillin signaling
18. RhoA signaling
19. Epithelial adherens junction signaling
20. Tec kinase signaling
21. Germ cell-sertoli cell junction signaling
22. Tight junction signaling
23. RhoGDI signaling
24. NRF2-mediated oxidative stress response
25. ILK signaling
26. Agranulocyte adhesion and diapedesis
27. Integrin signaling
28. Leukocyte extravasation signaling
29. Actin cytoskeleton signaling
30. Signaling by Rho family GTPases
31. Calcium signaling
32. Protein ubiquitination pathway
33. Nitric oxide signaling in the cardiovascular system

Dataset 8-Canonical Pathway Chart

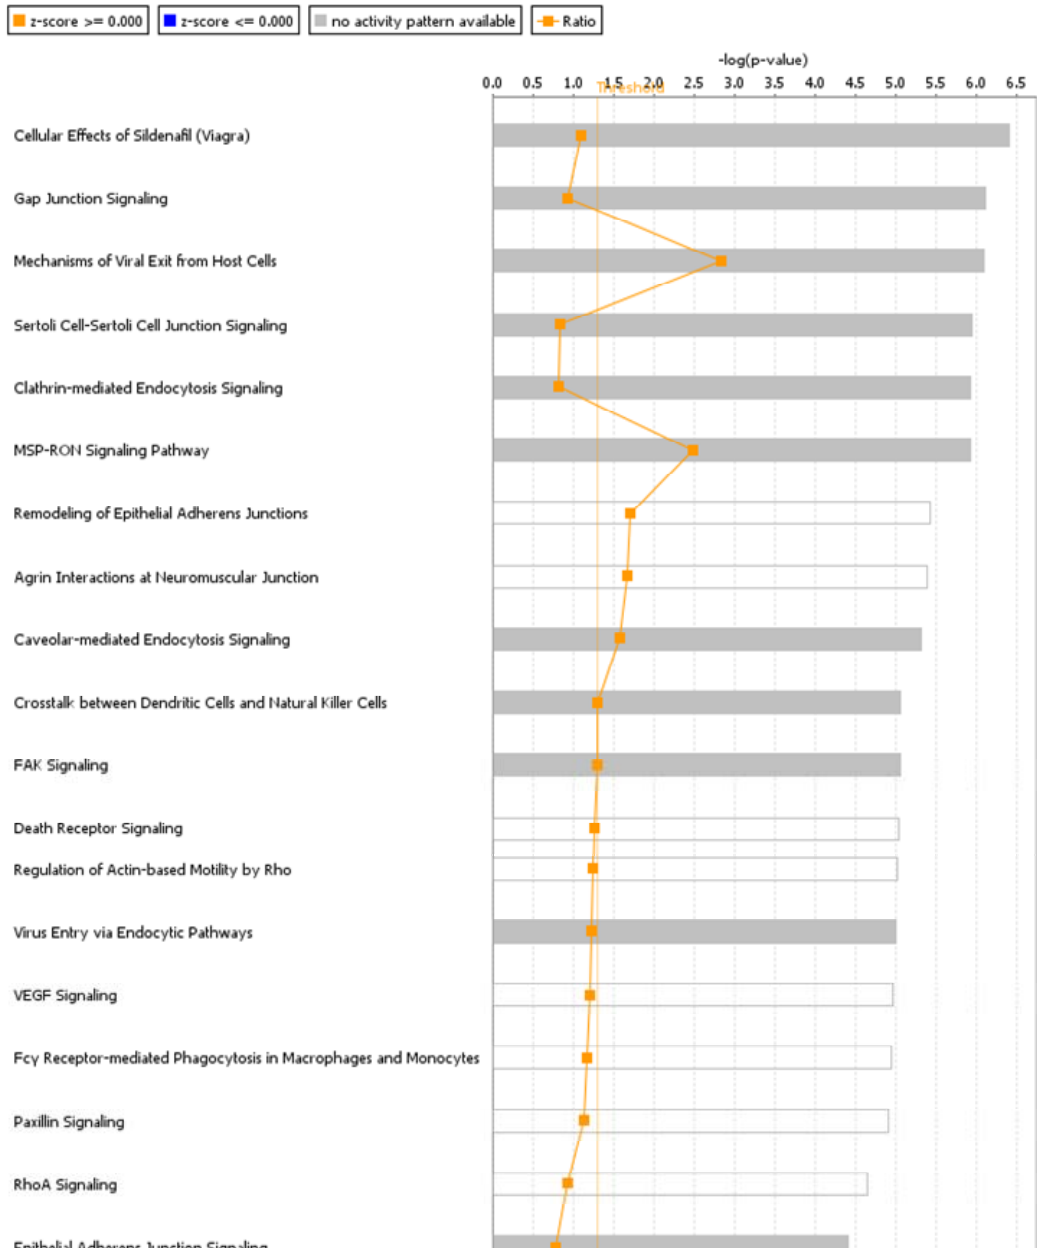

# 1-Cellular effects of sildenafil (Viagra)

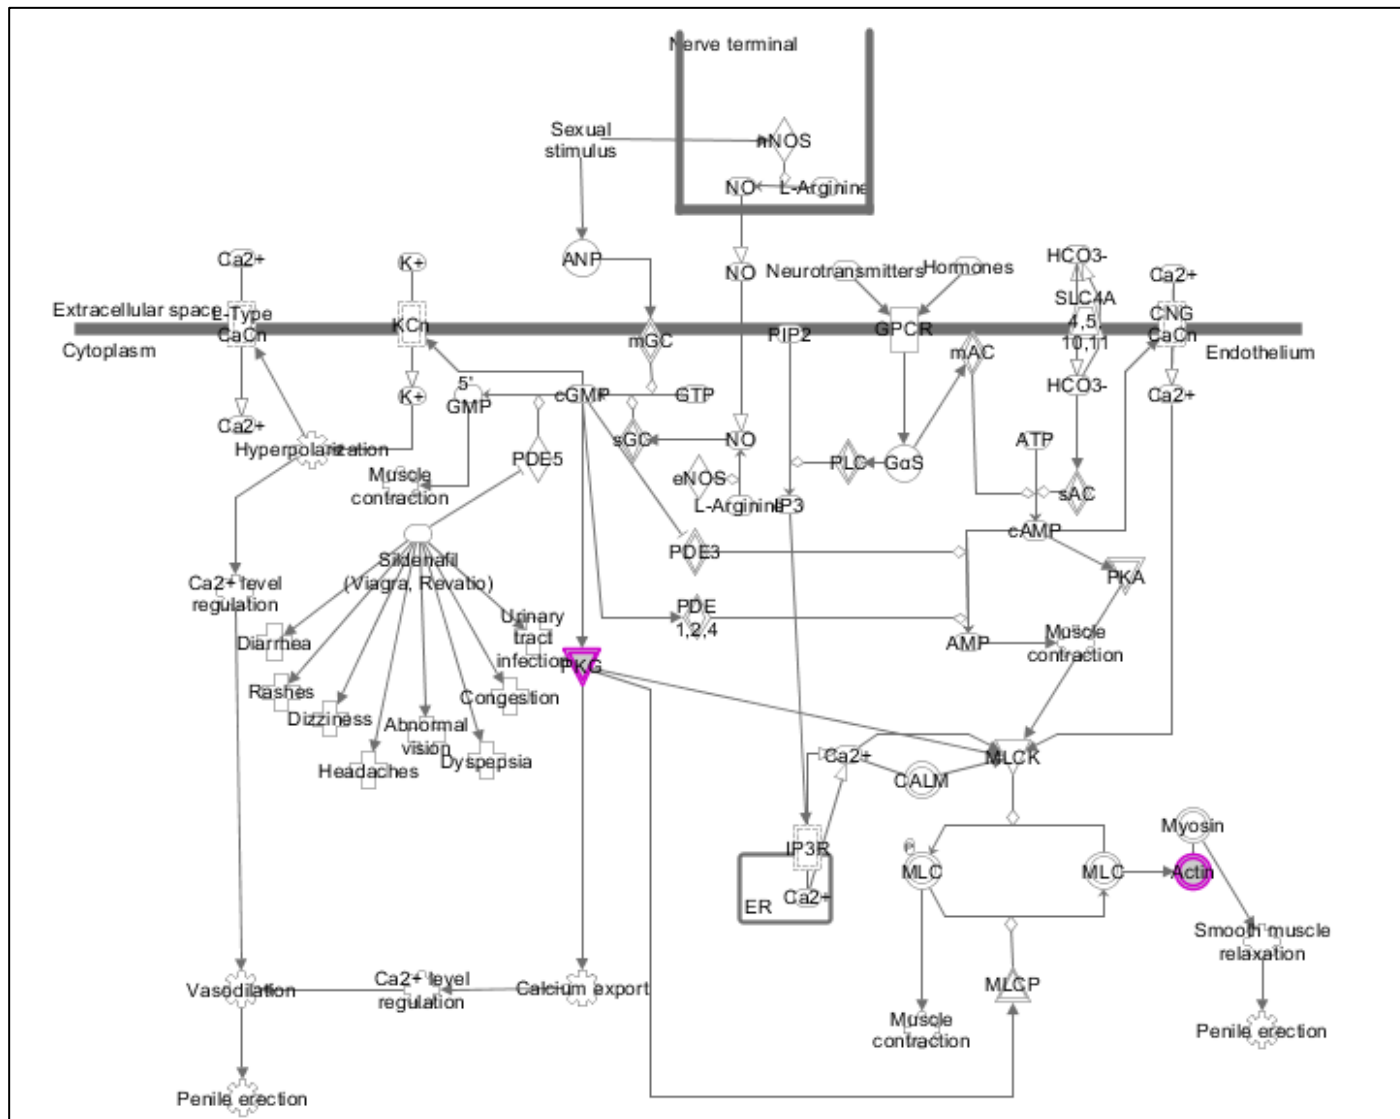

## 2-Gap junction signaling

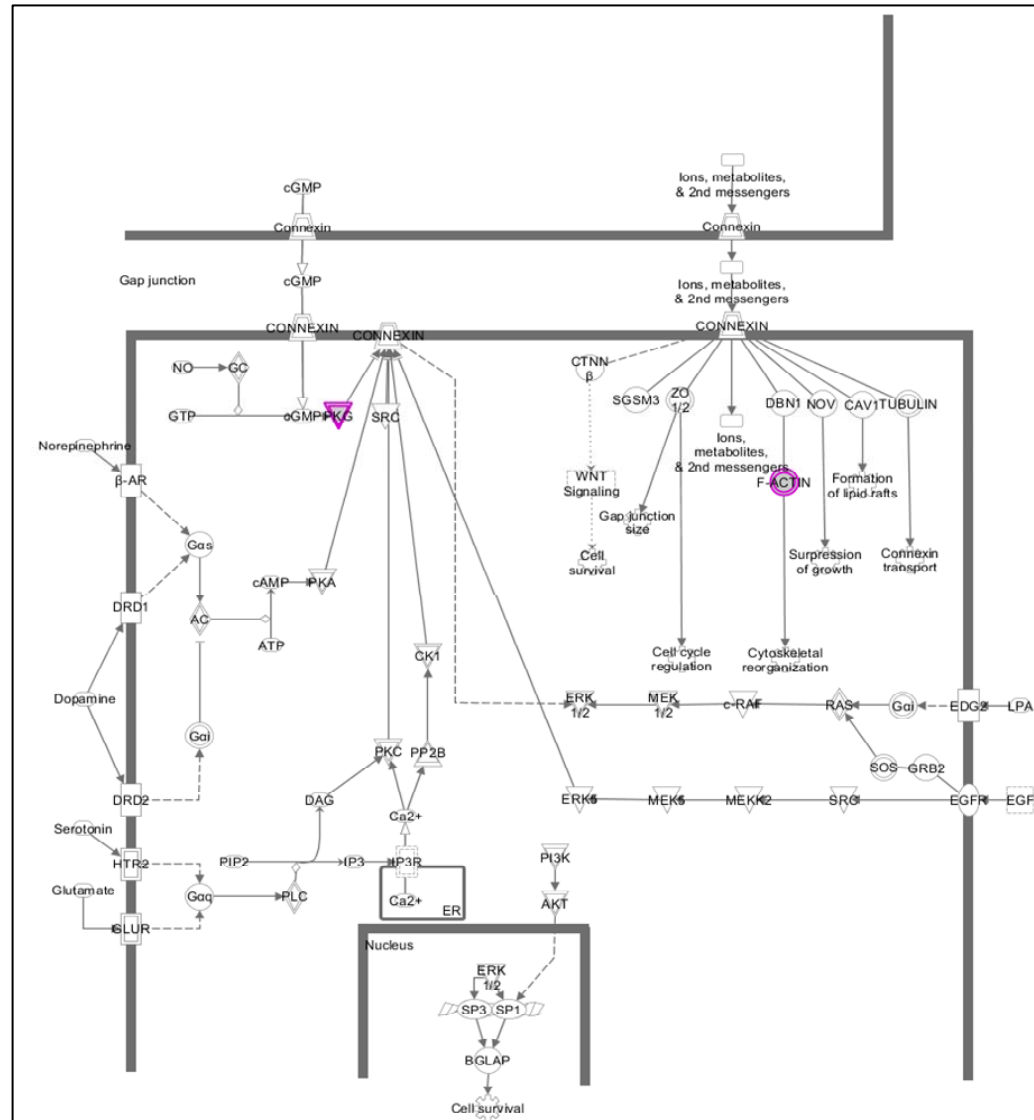

### 3-Mechanisms of viral exit from host cells

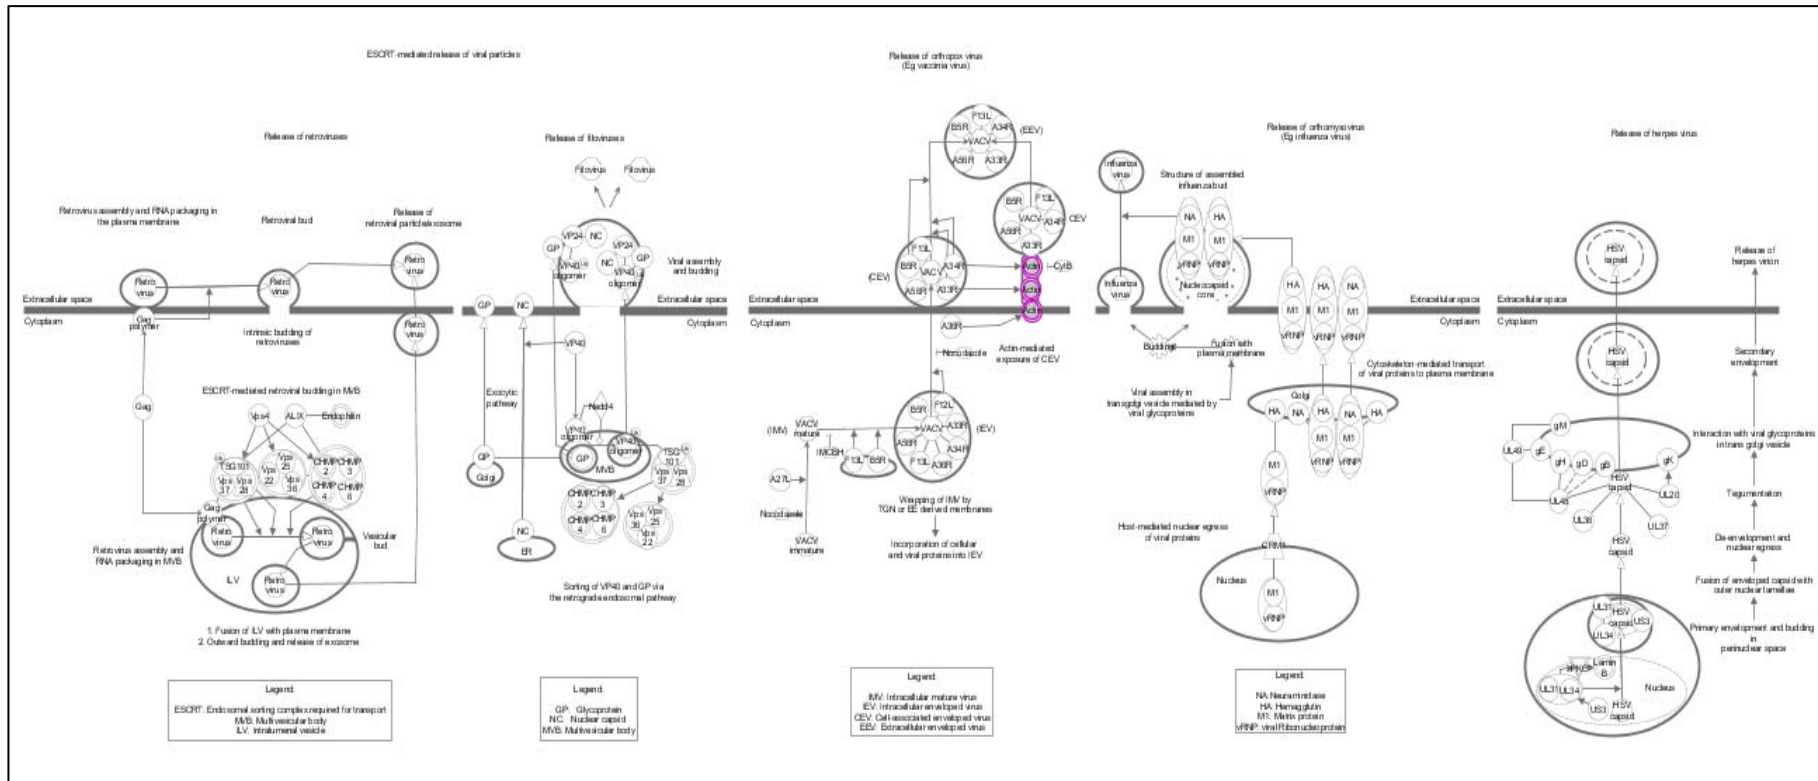

## 4-Sertoli cell-sertoli cell junction signaling

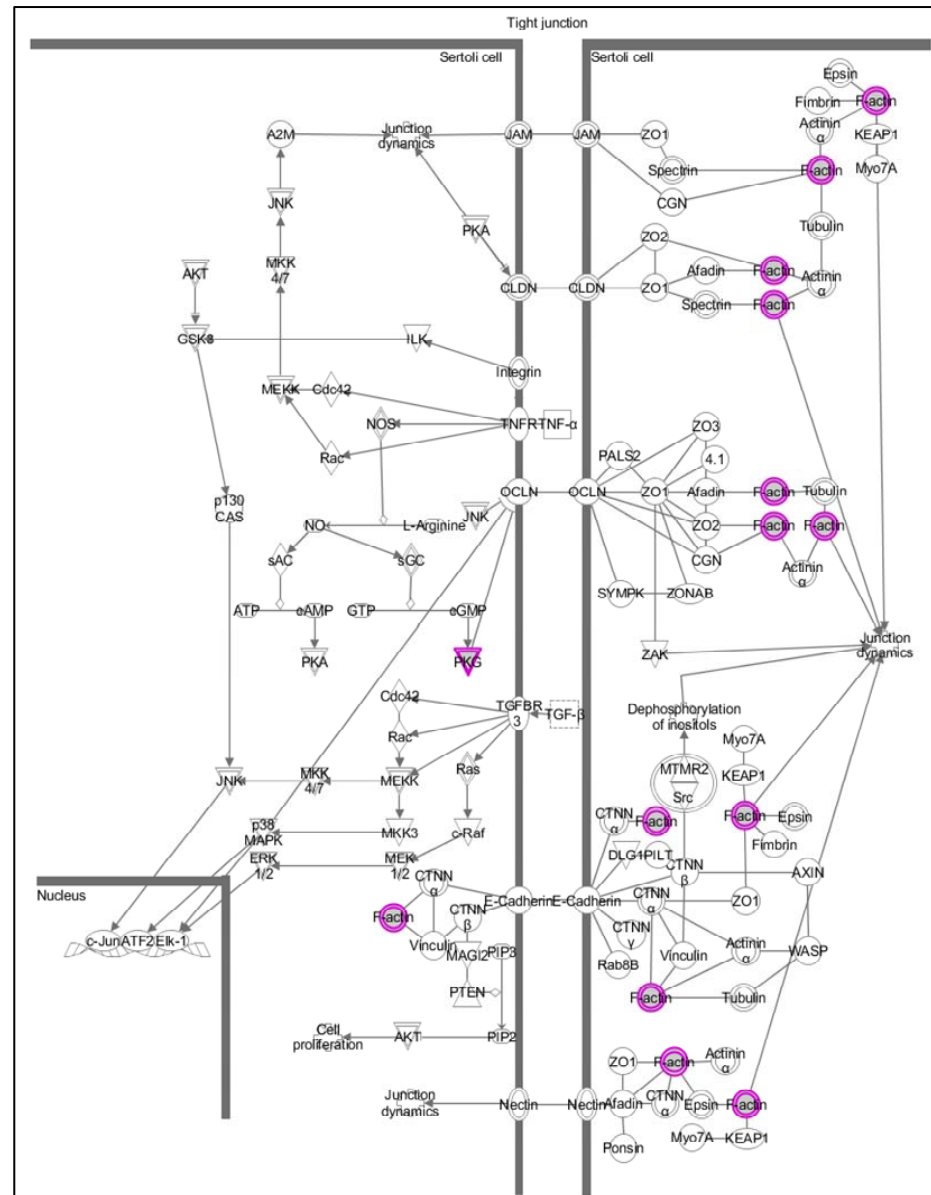

## 5-Clathrin-mediated endocytosis signaling

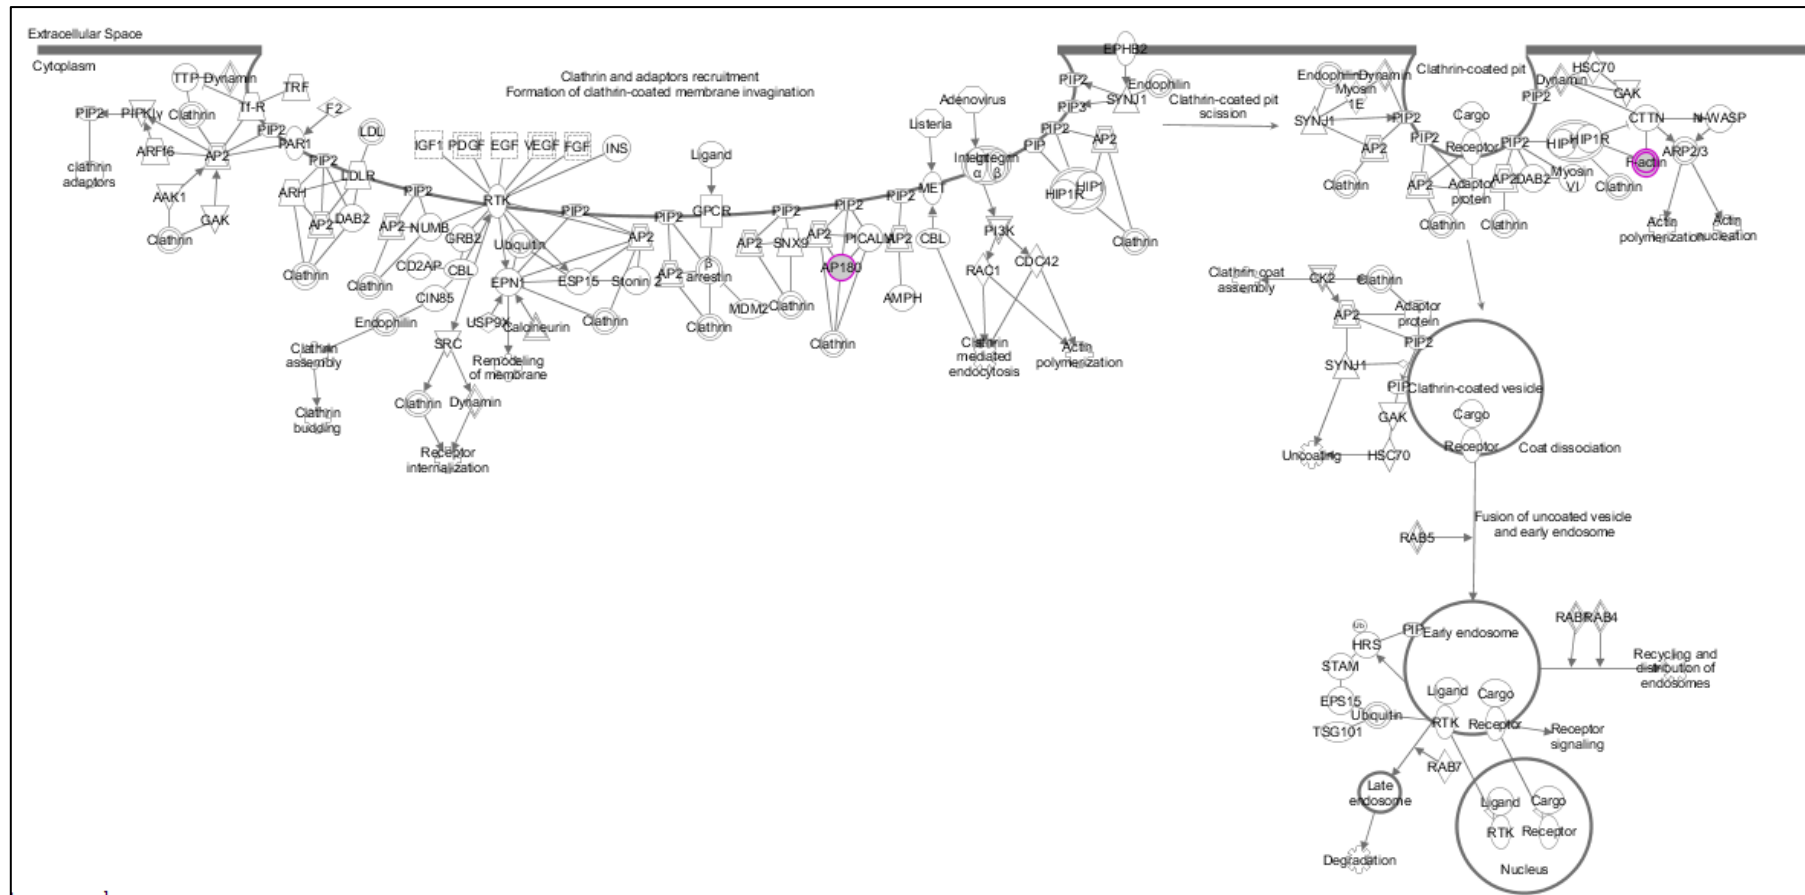

## 6-MSP-RON signaling pathway

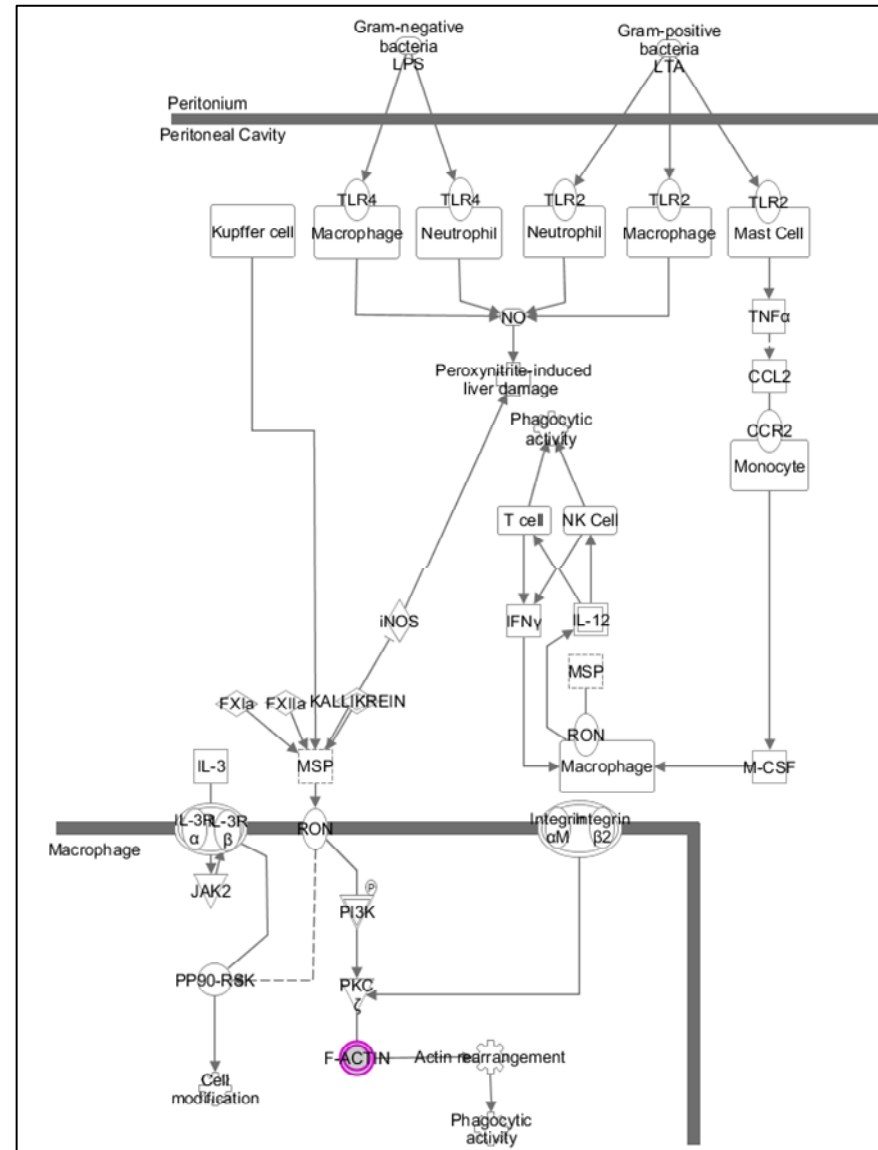

## 7-Remodeling of epithelial adherens junctions

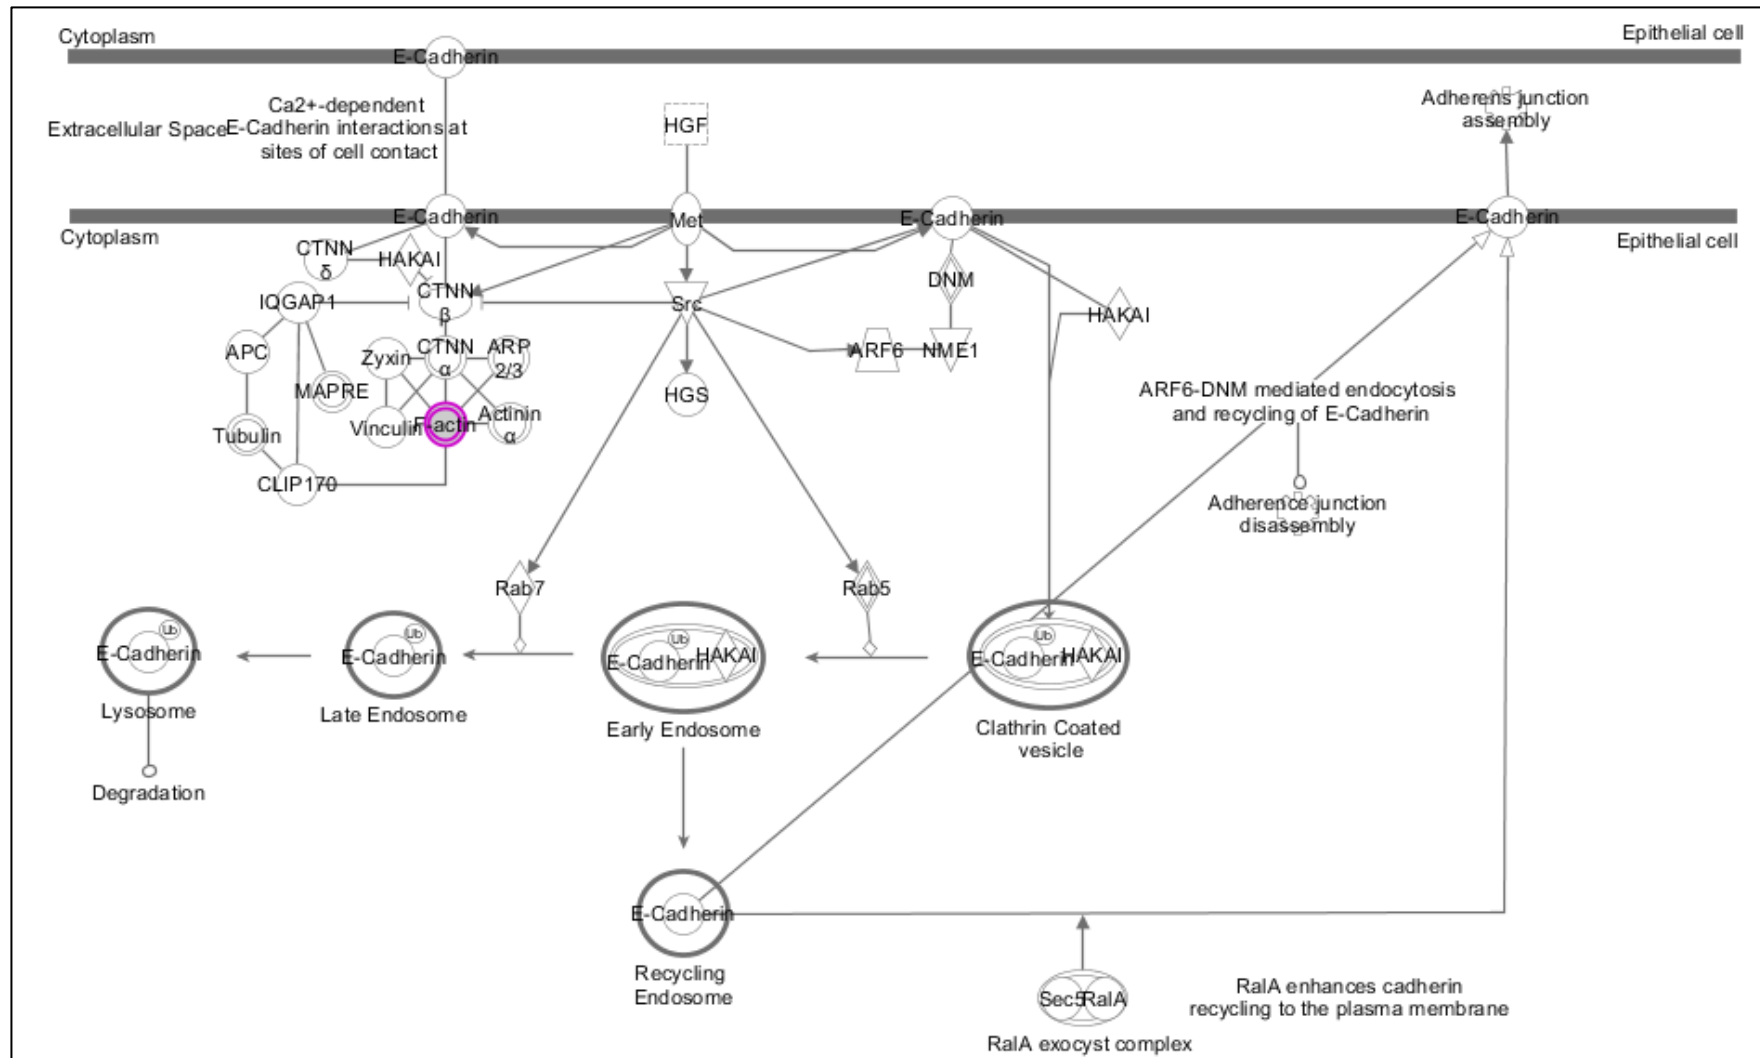

## 8-Agrin interactions at neuromuscular junction

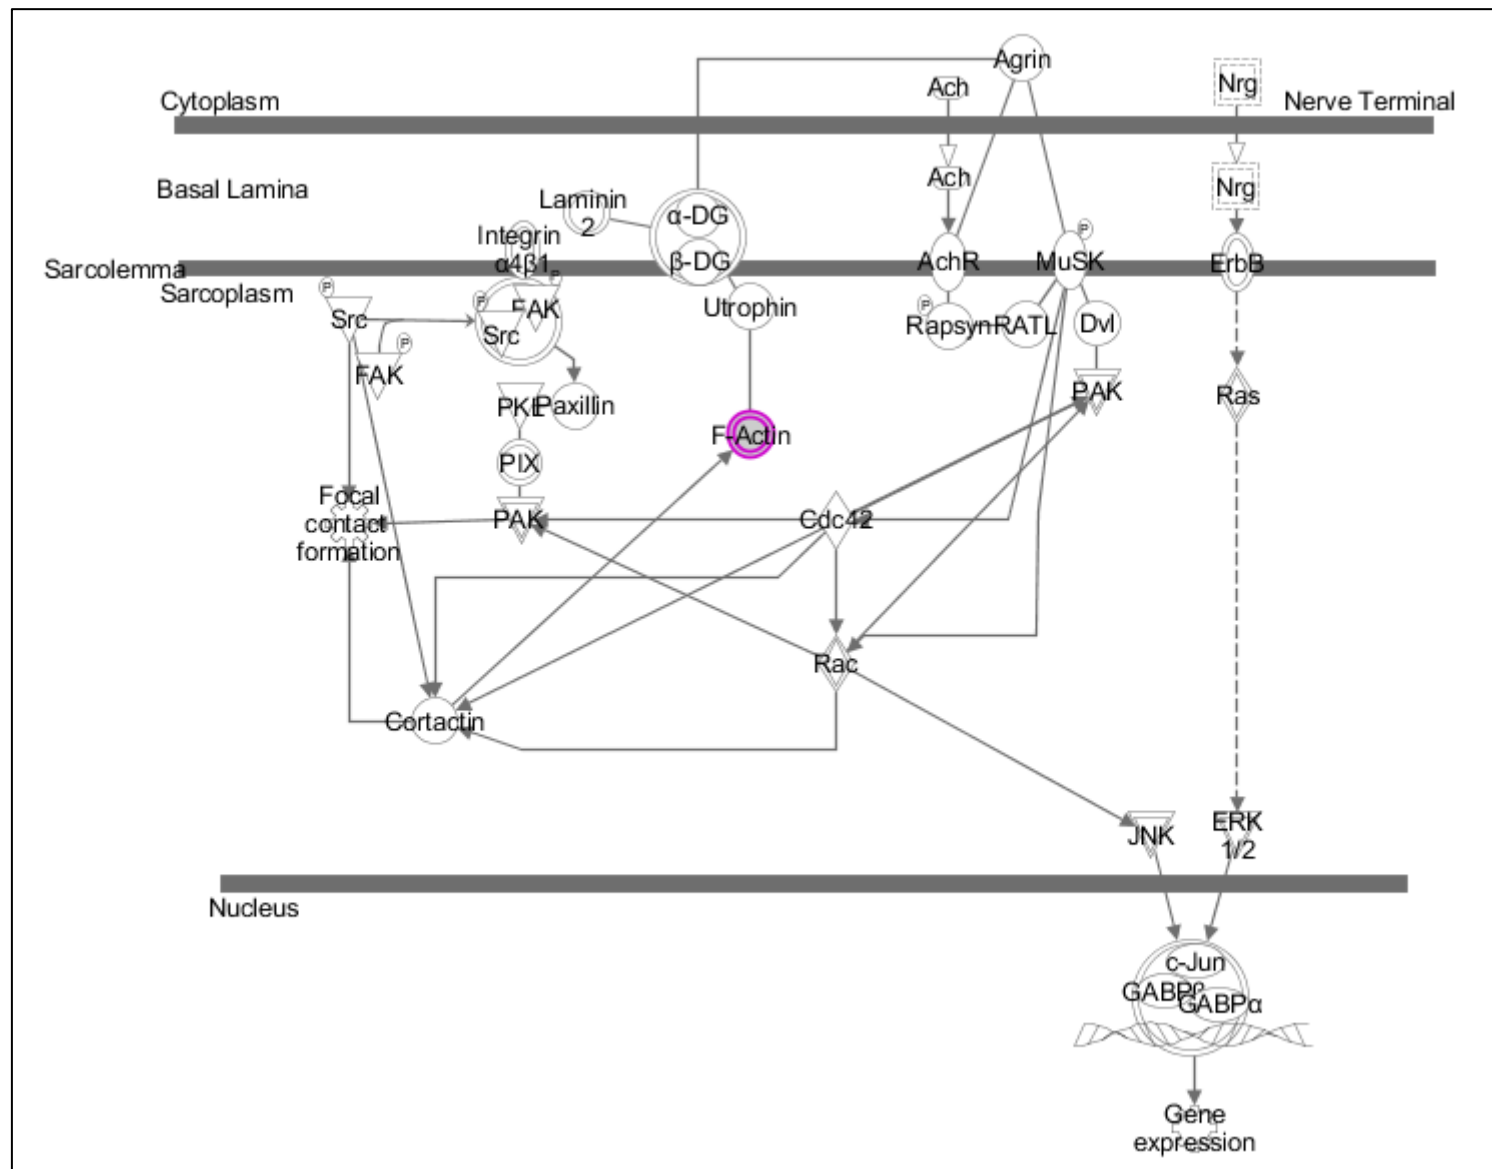

## 9-Caveolar-mediated endocytosis signaling

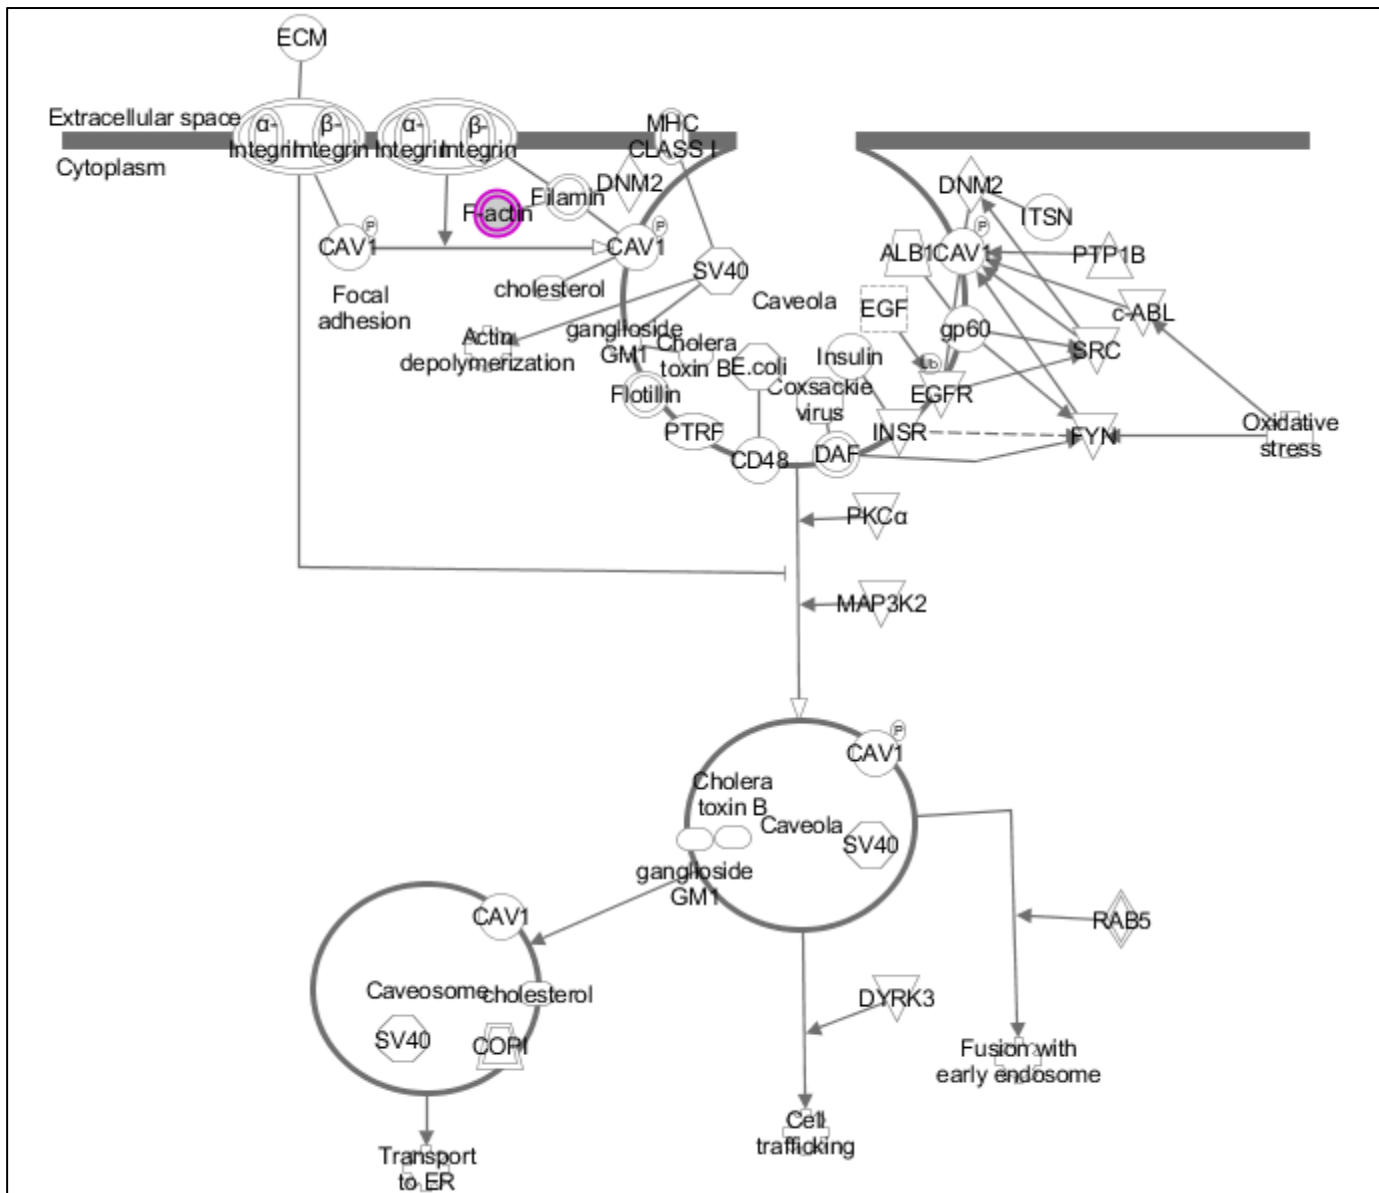

## 10-Crosstalk between dendritic cells and natural killer cells

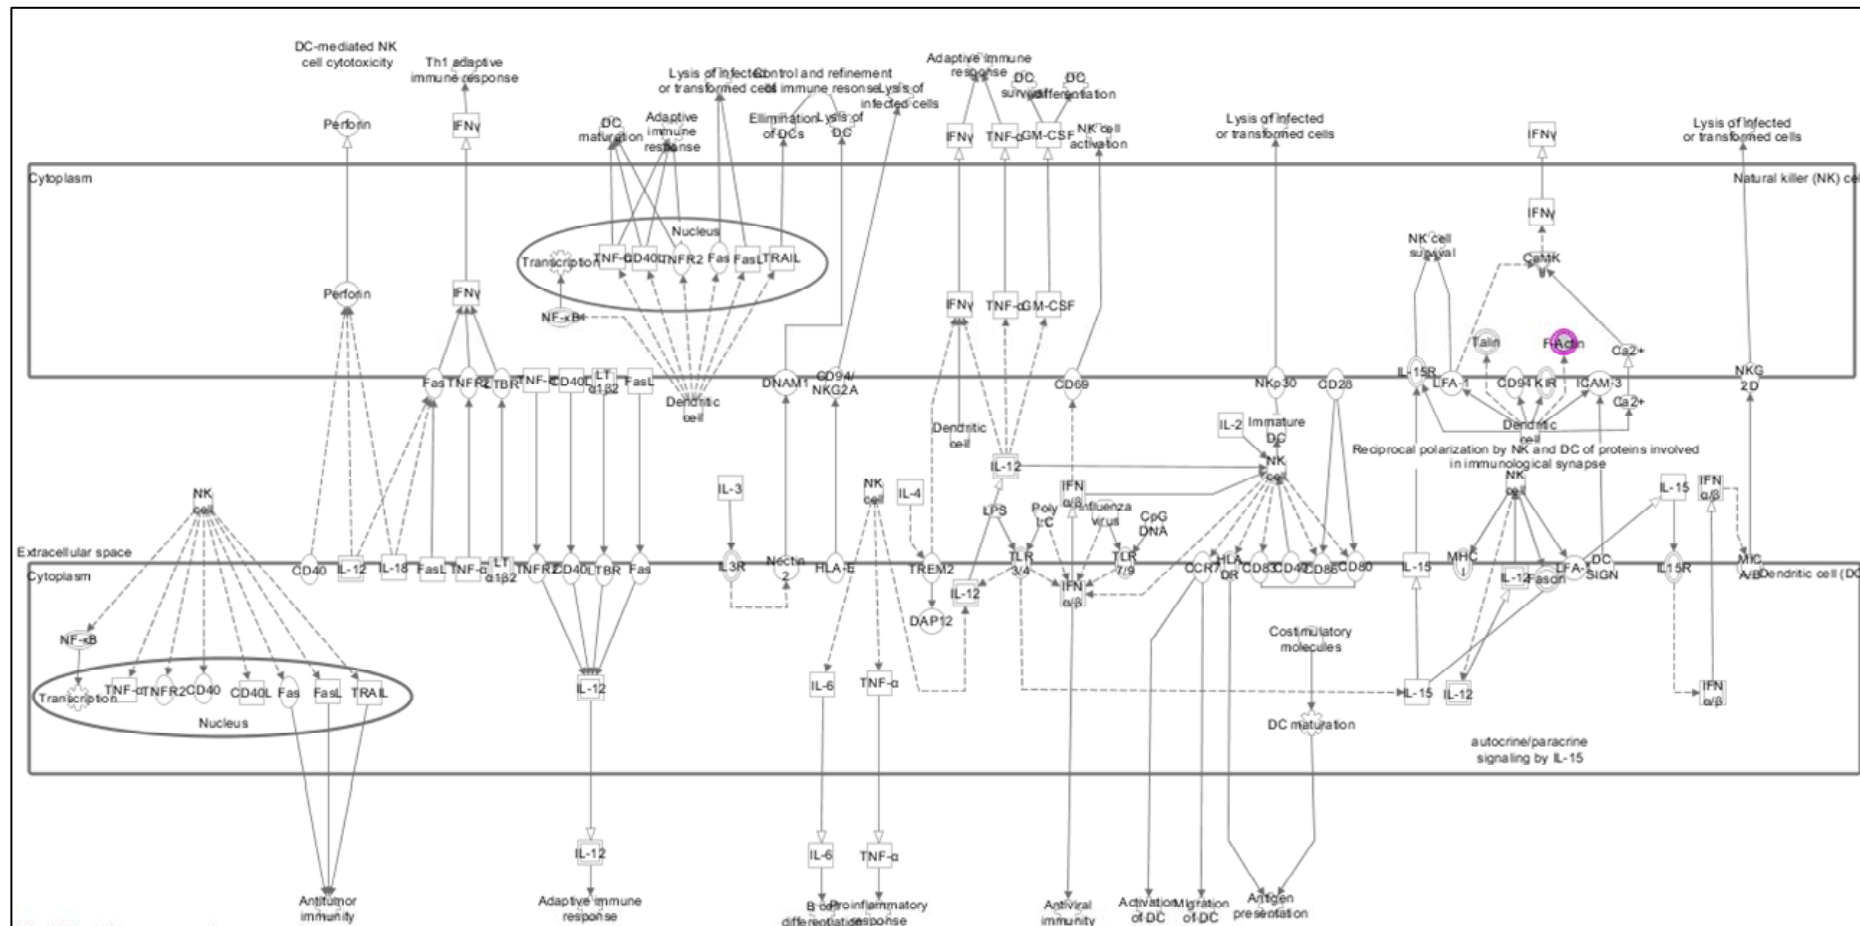

## 11-FAK signaling

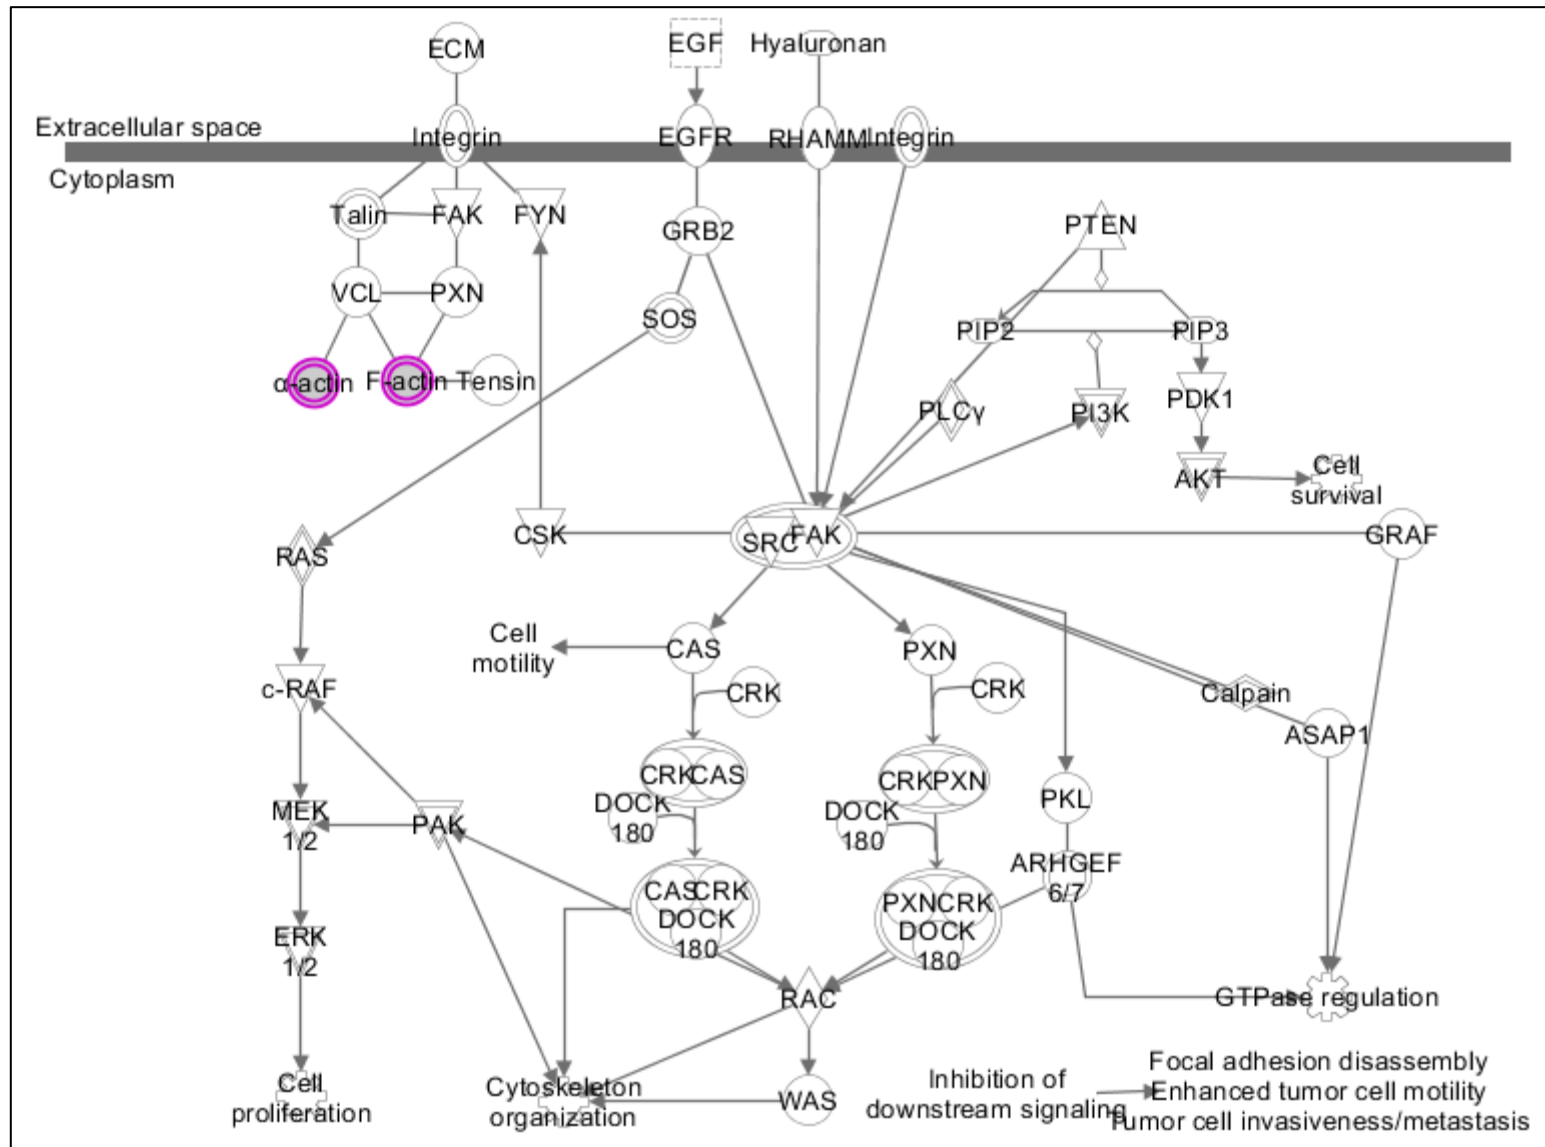

## 12-Death receptor signaling

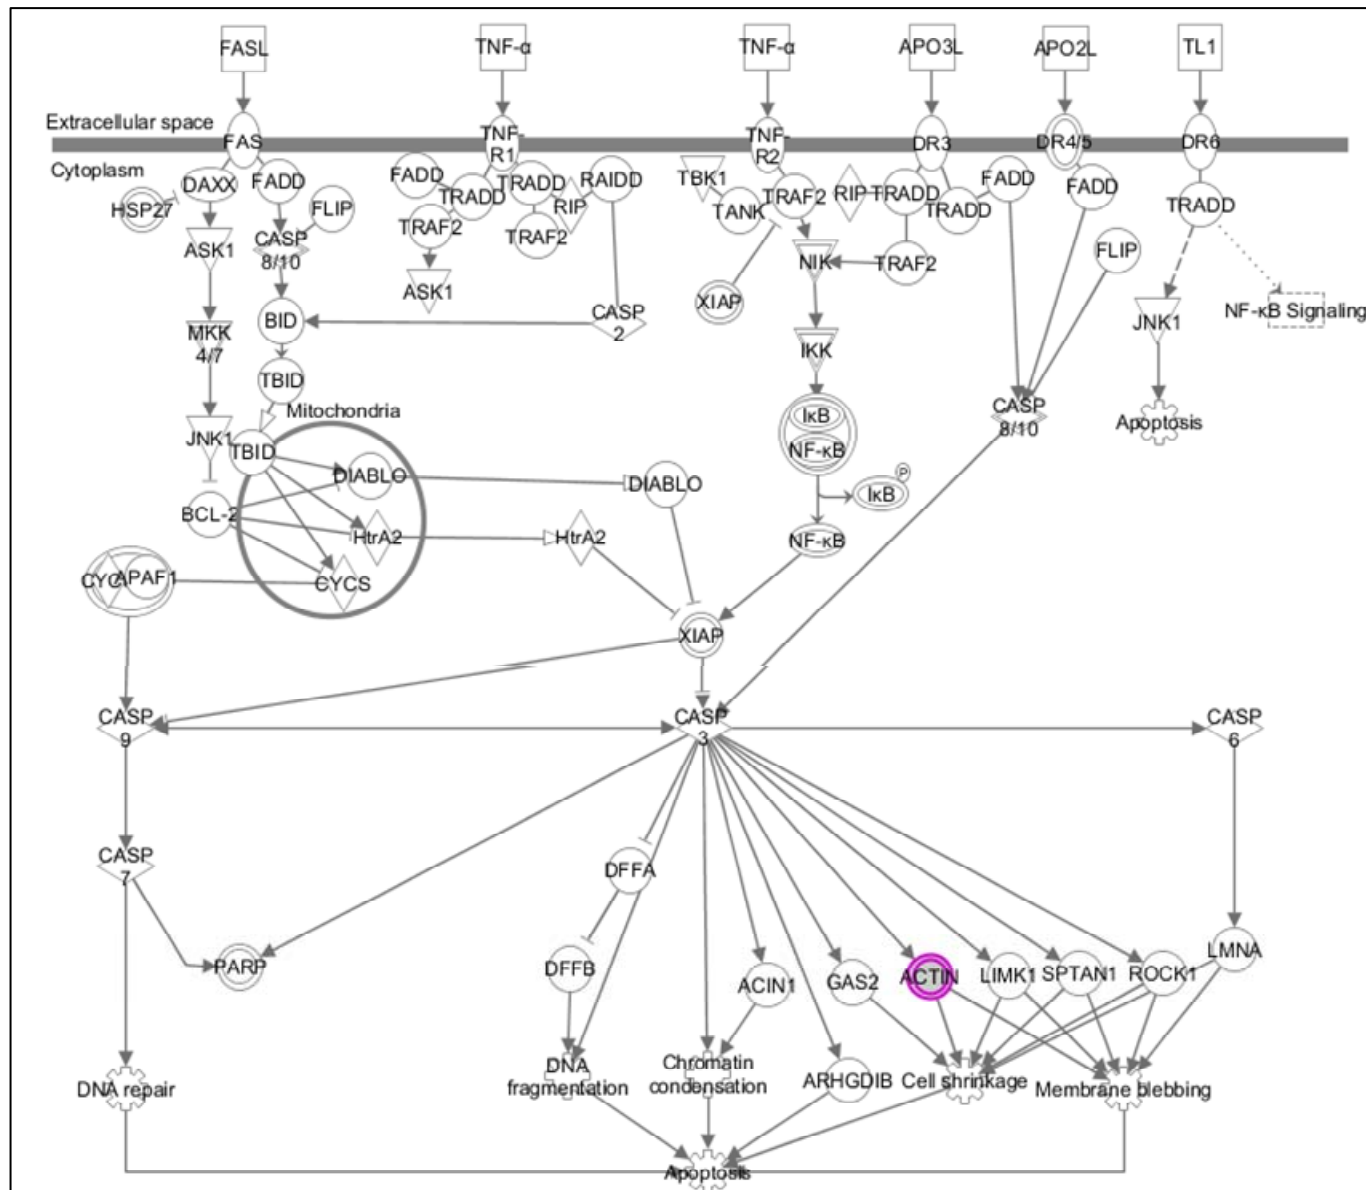

## 13-Regulation of actin-based motility by Rho

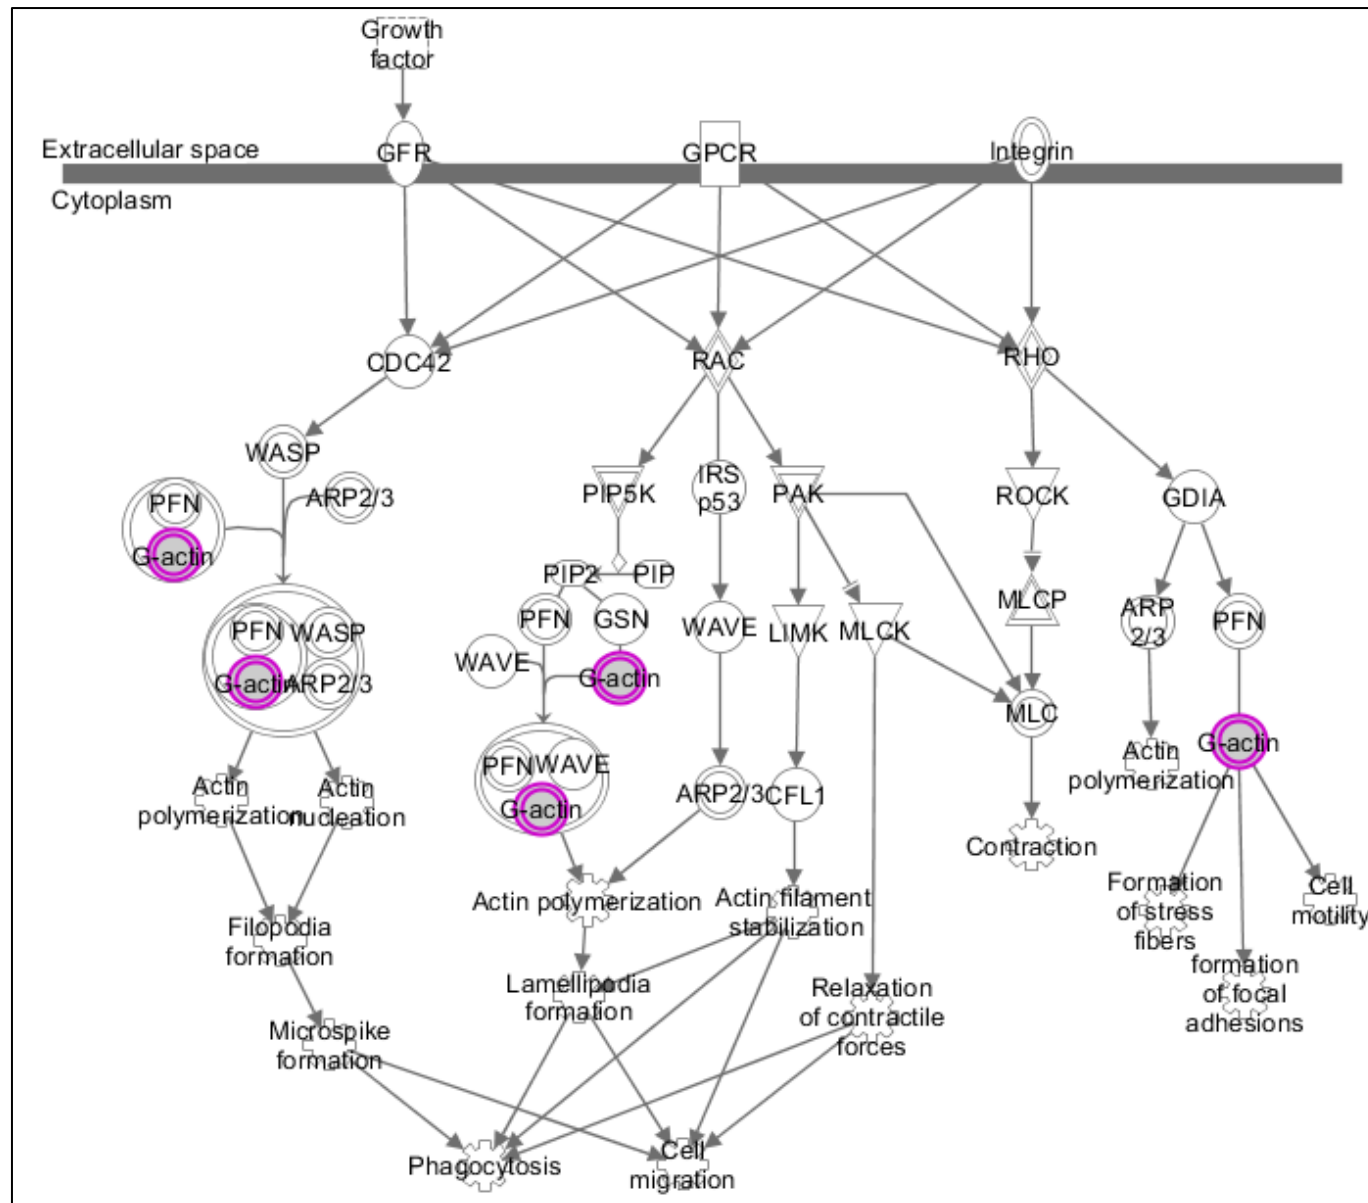

## 14-Virus entry via endocytic pathways

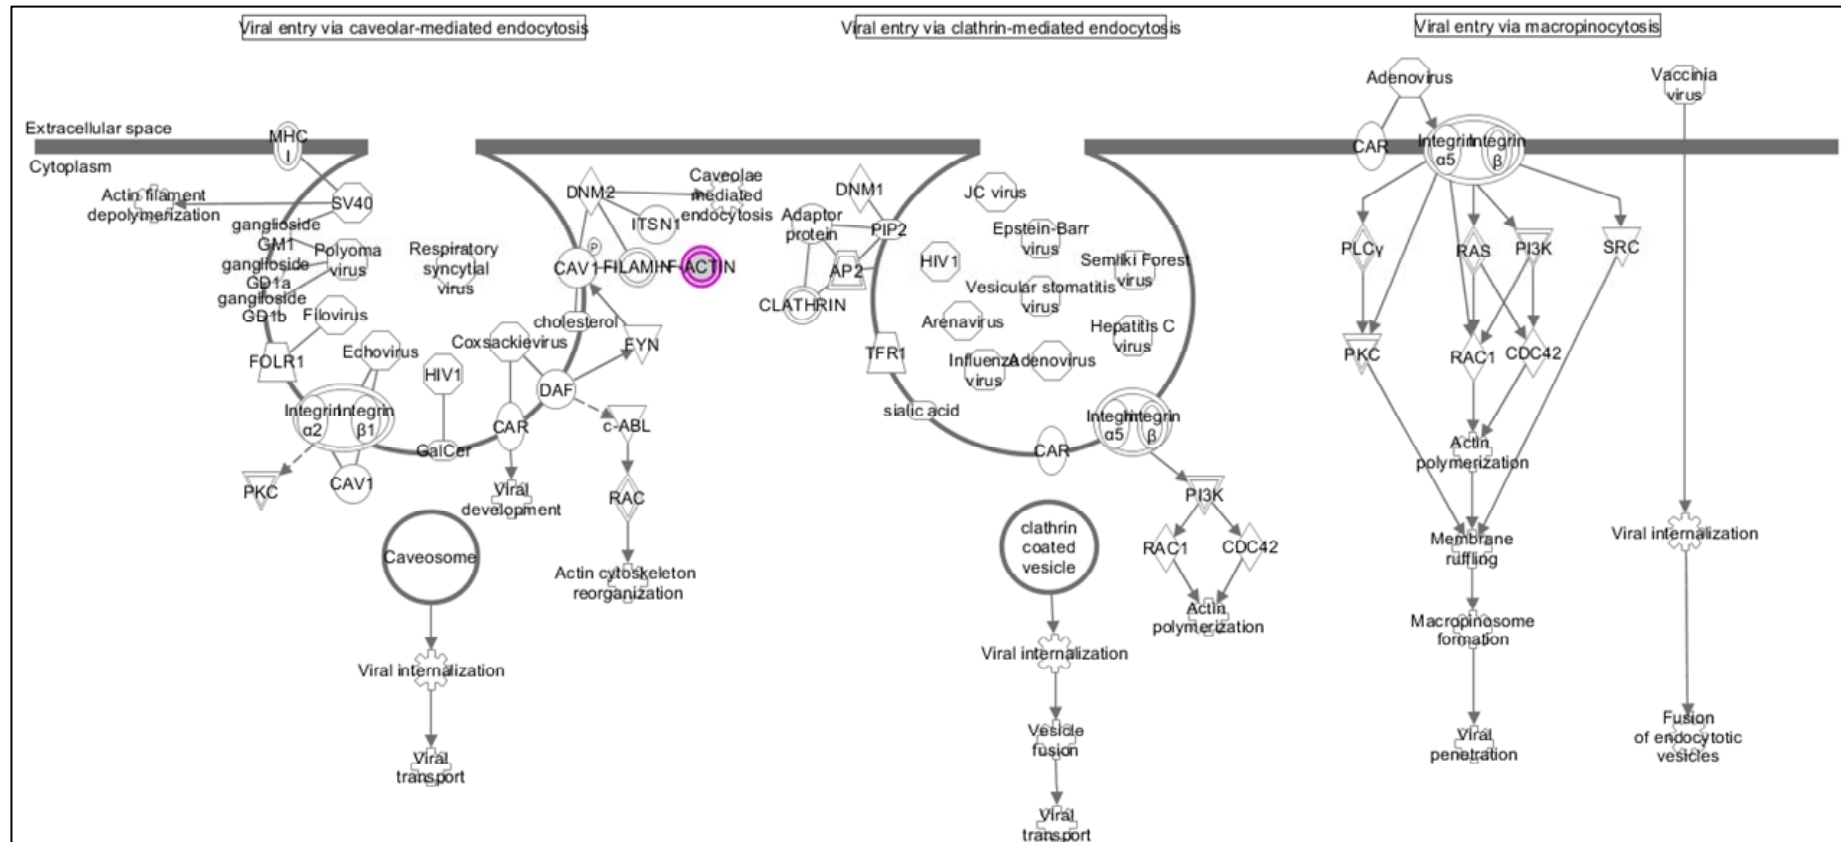

## 15-VEGF signaling

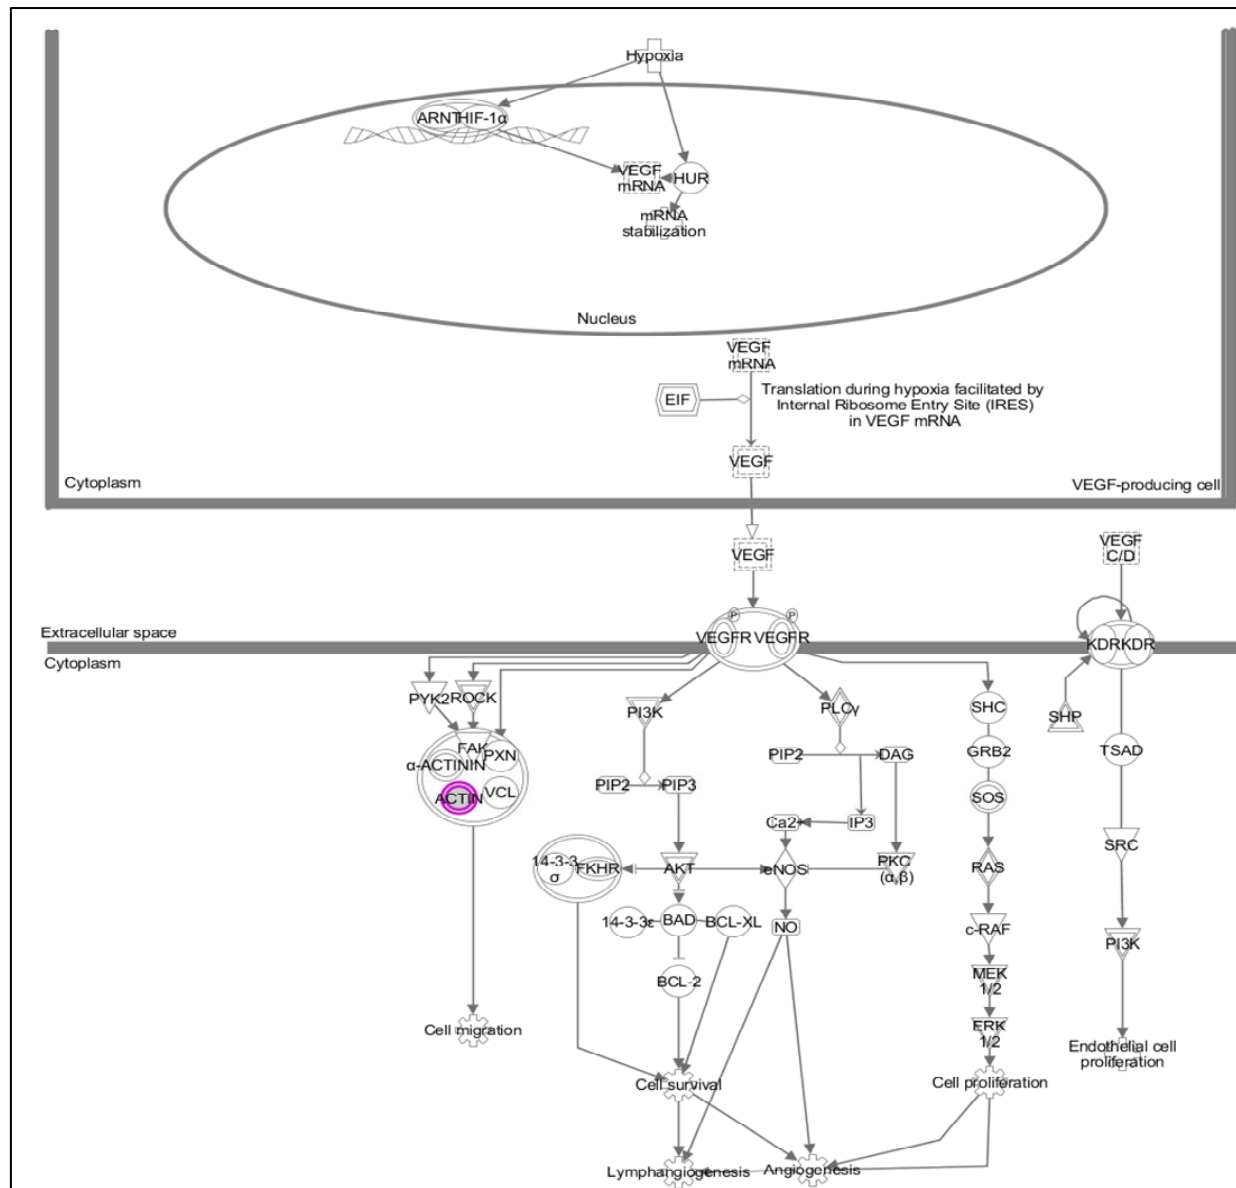

# 16-Fcy receptor-mediated phagocytosis in macrophages and monocytes

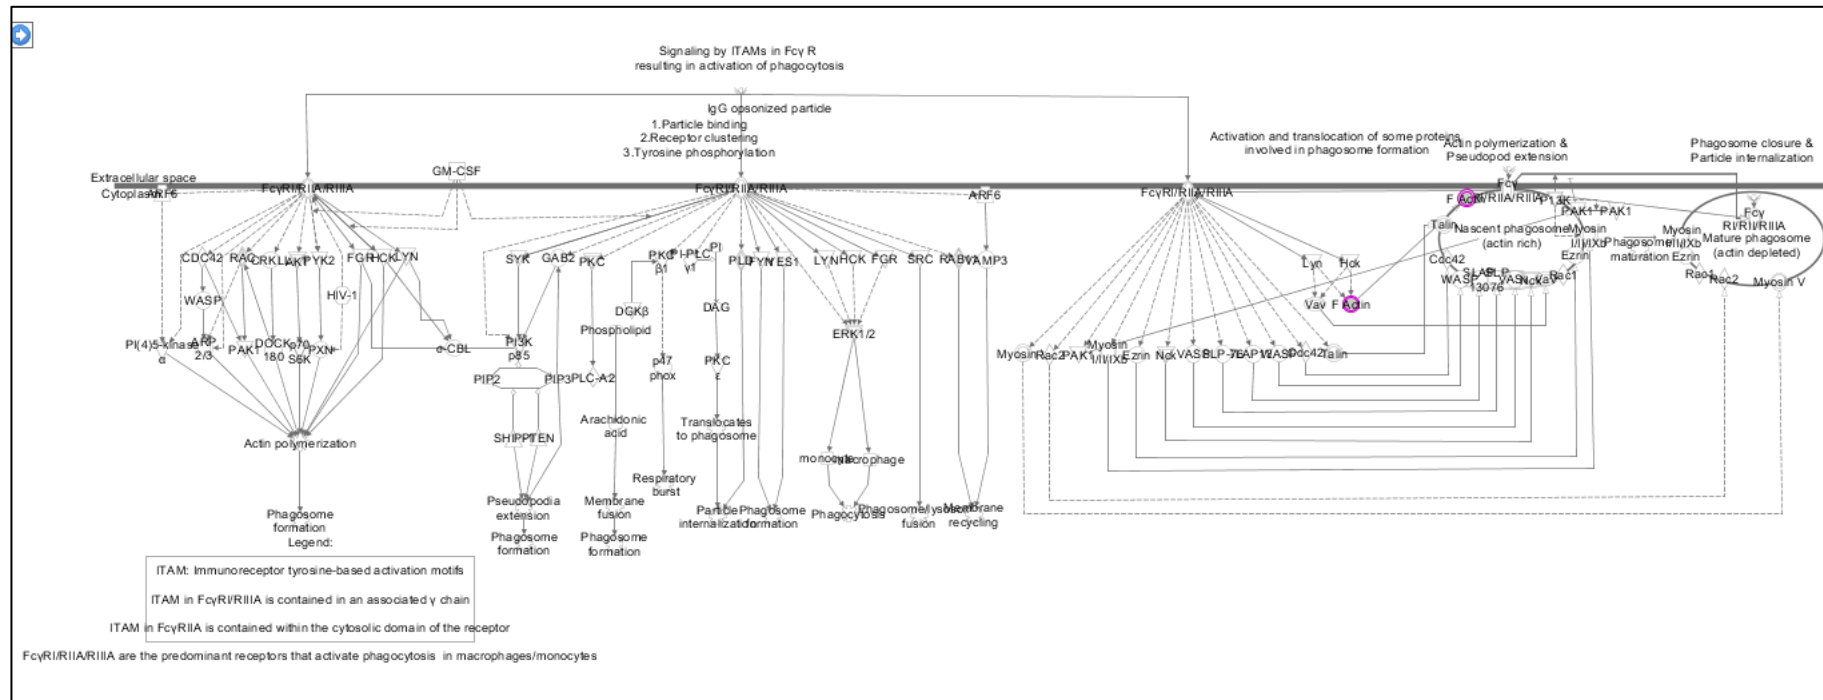

## 17-Paxillin signaling

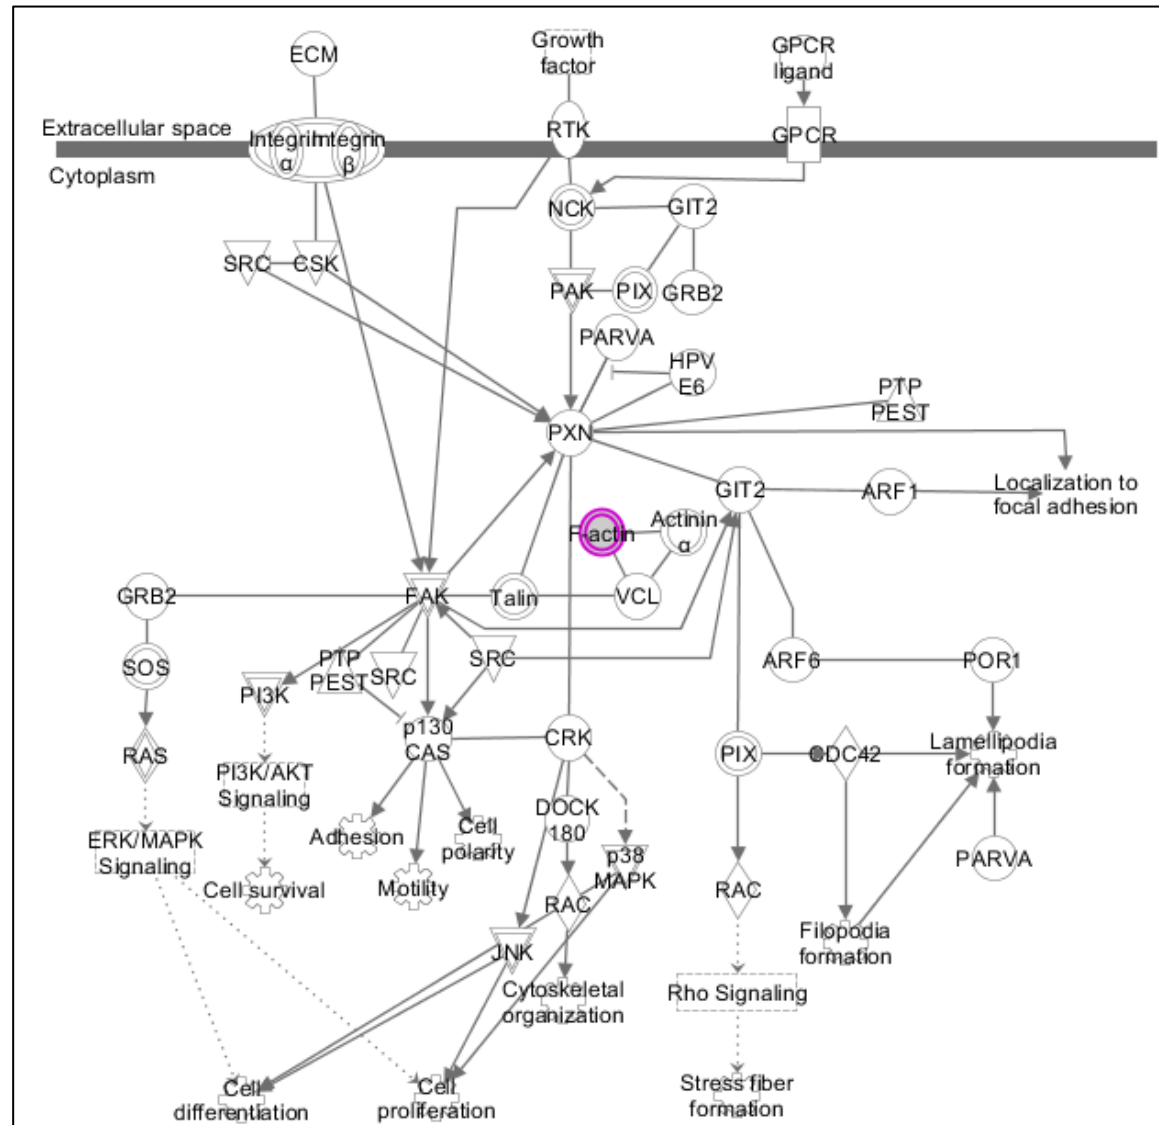

## 18-RhoA signaling

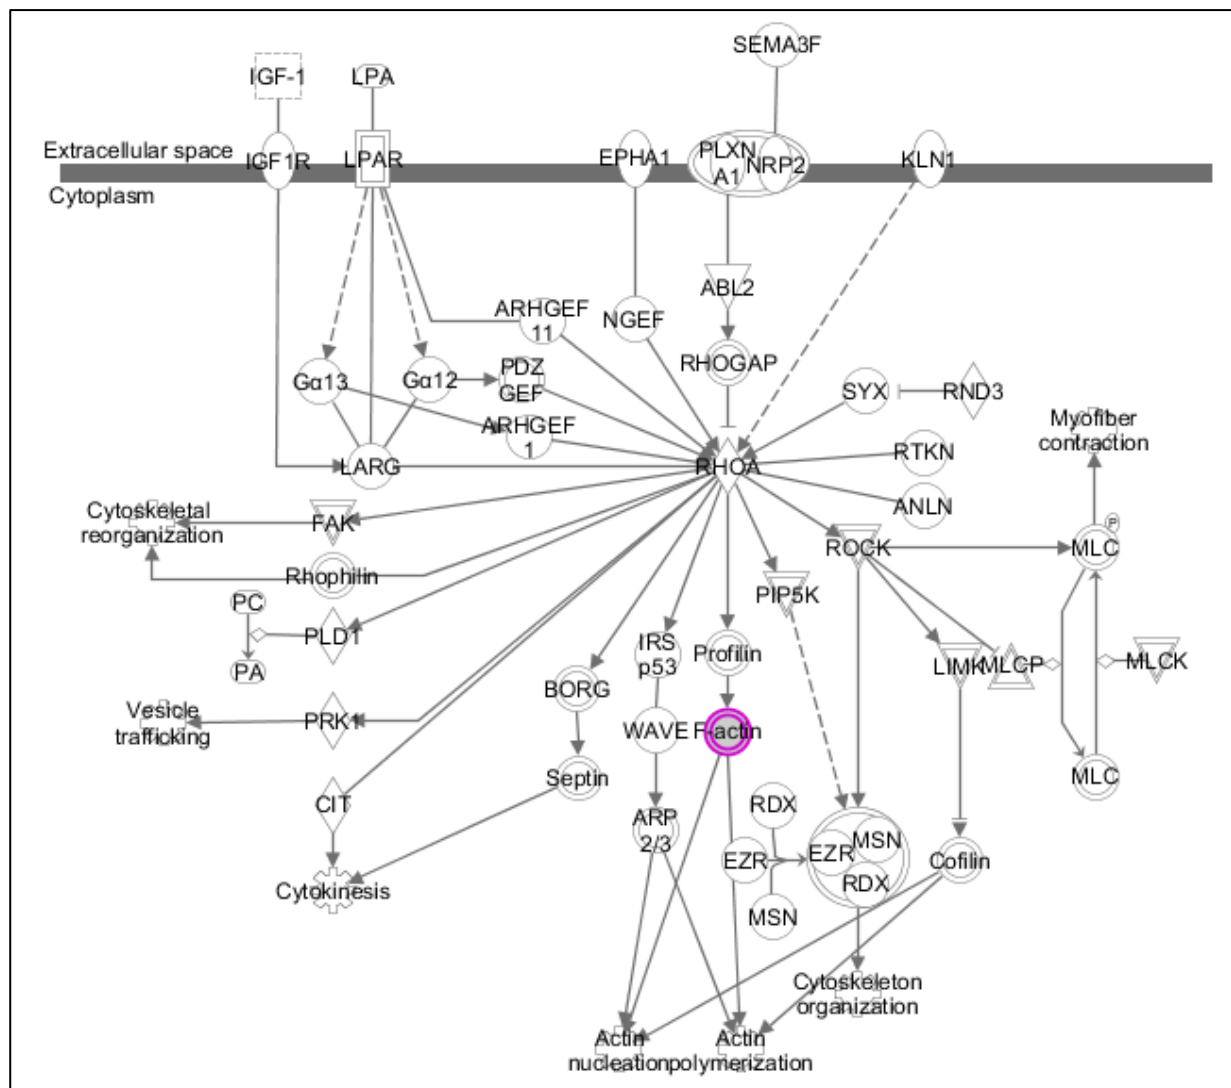

## 19-Epithelial adherens junction signaling

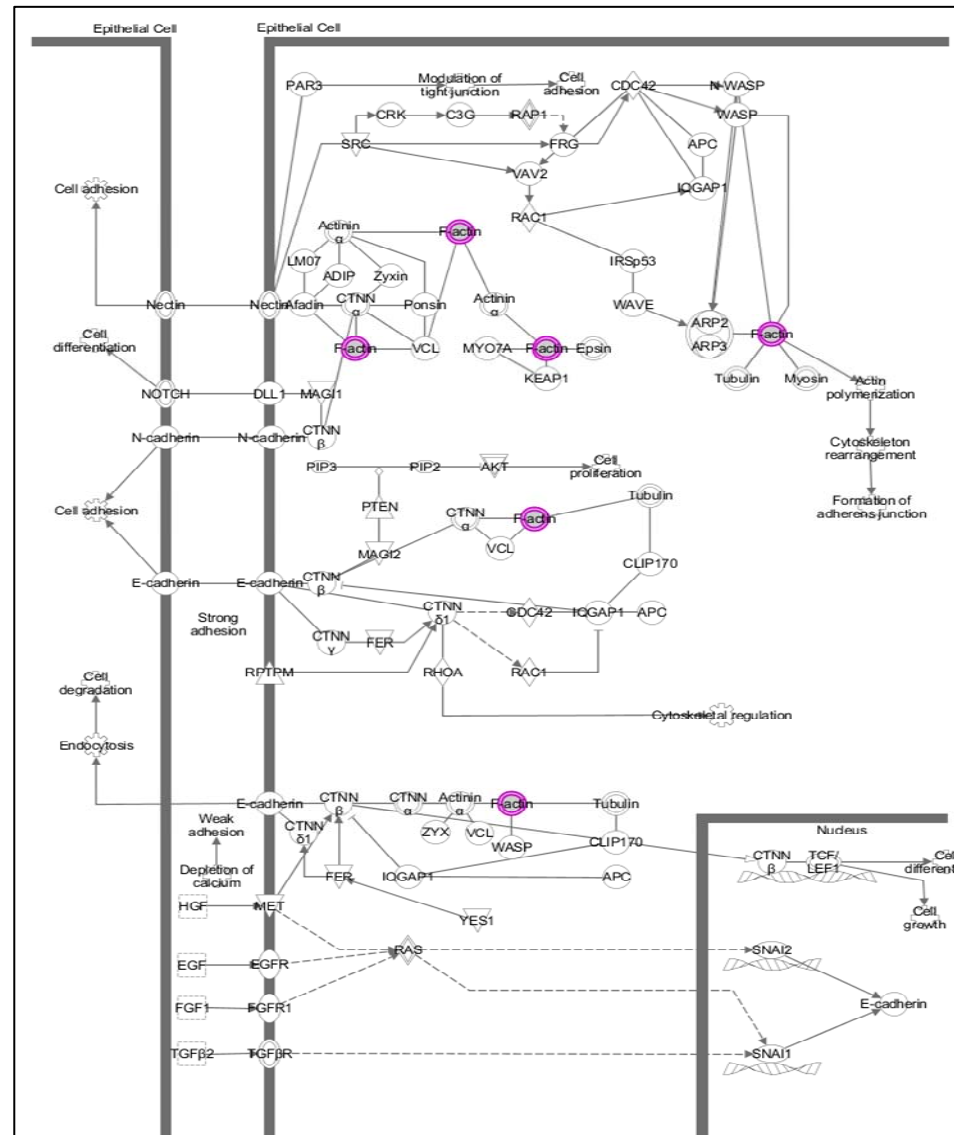

## 20-Tec kinase signaling

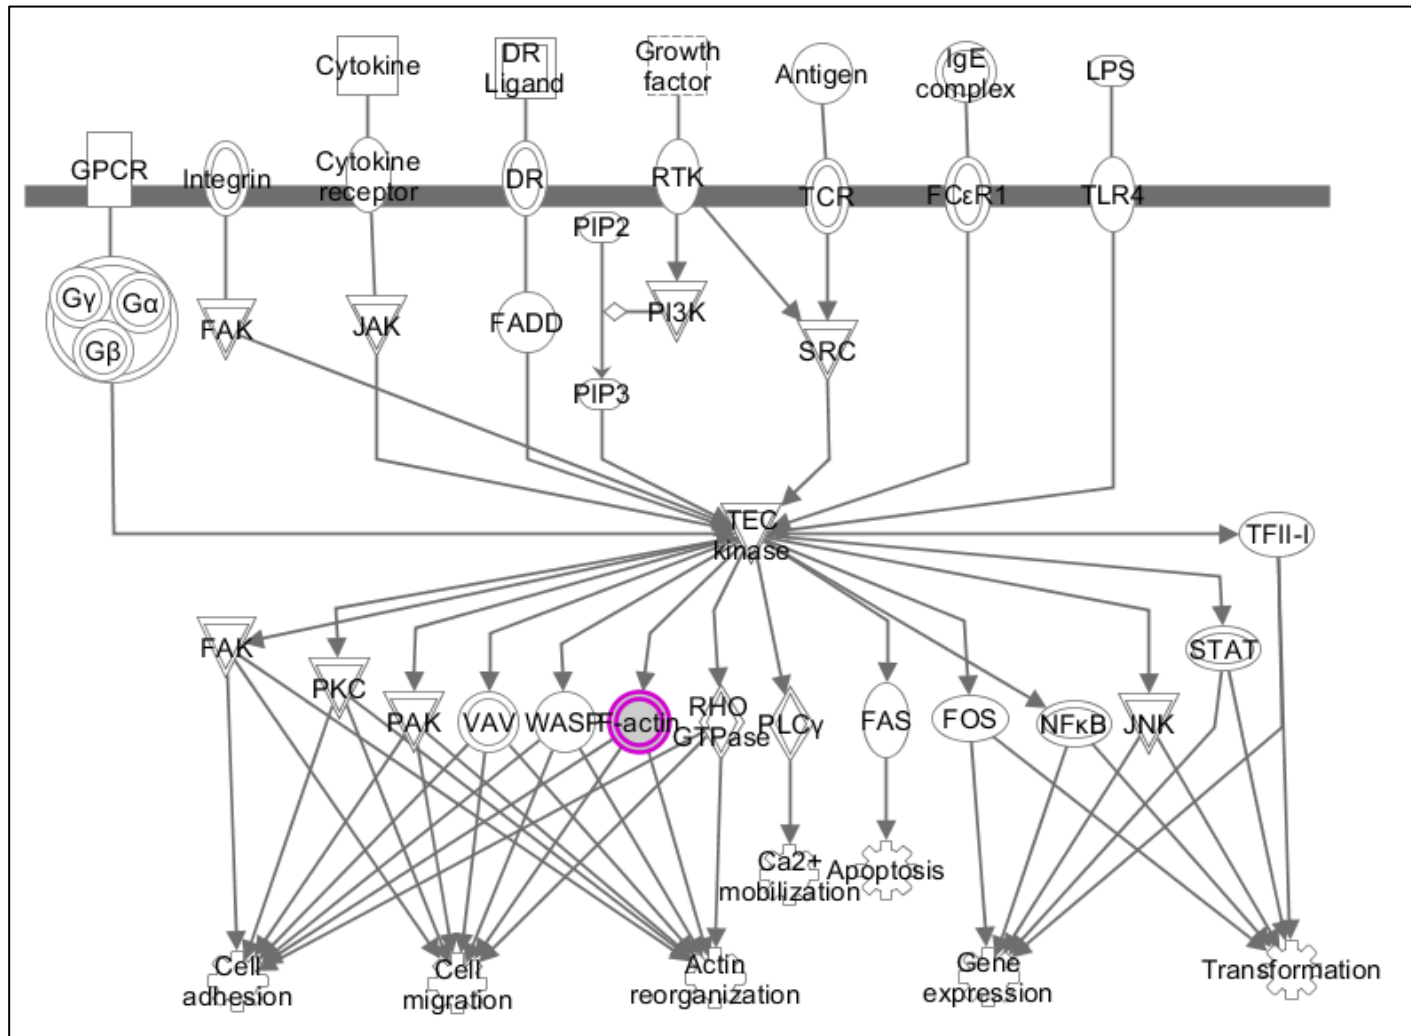

## 21-Germ cell-sertoli cell junction signaling

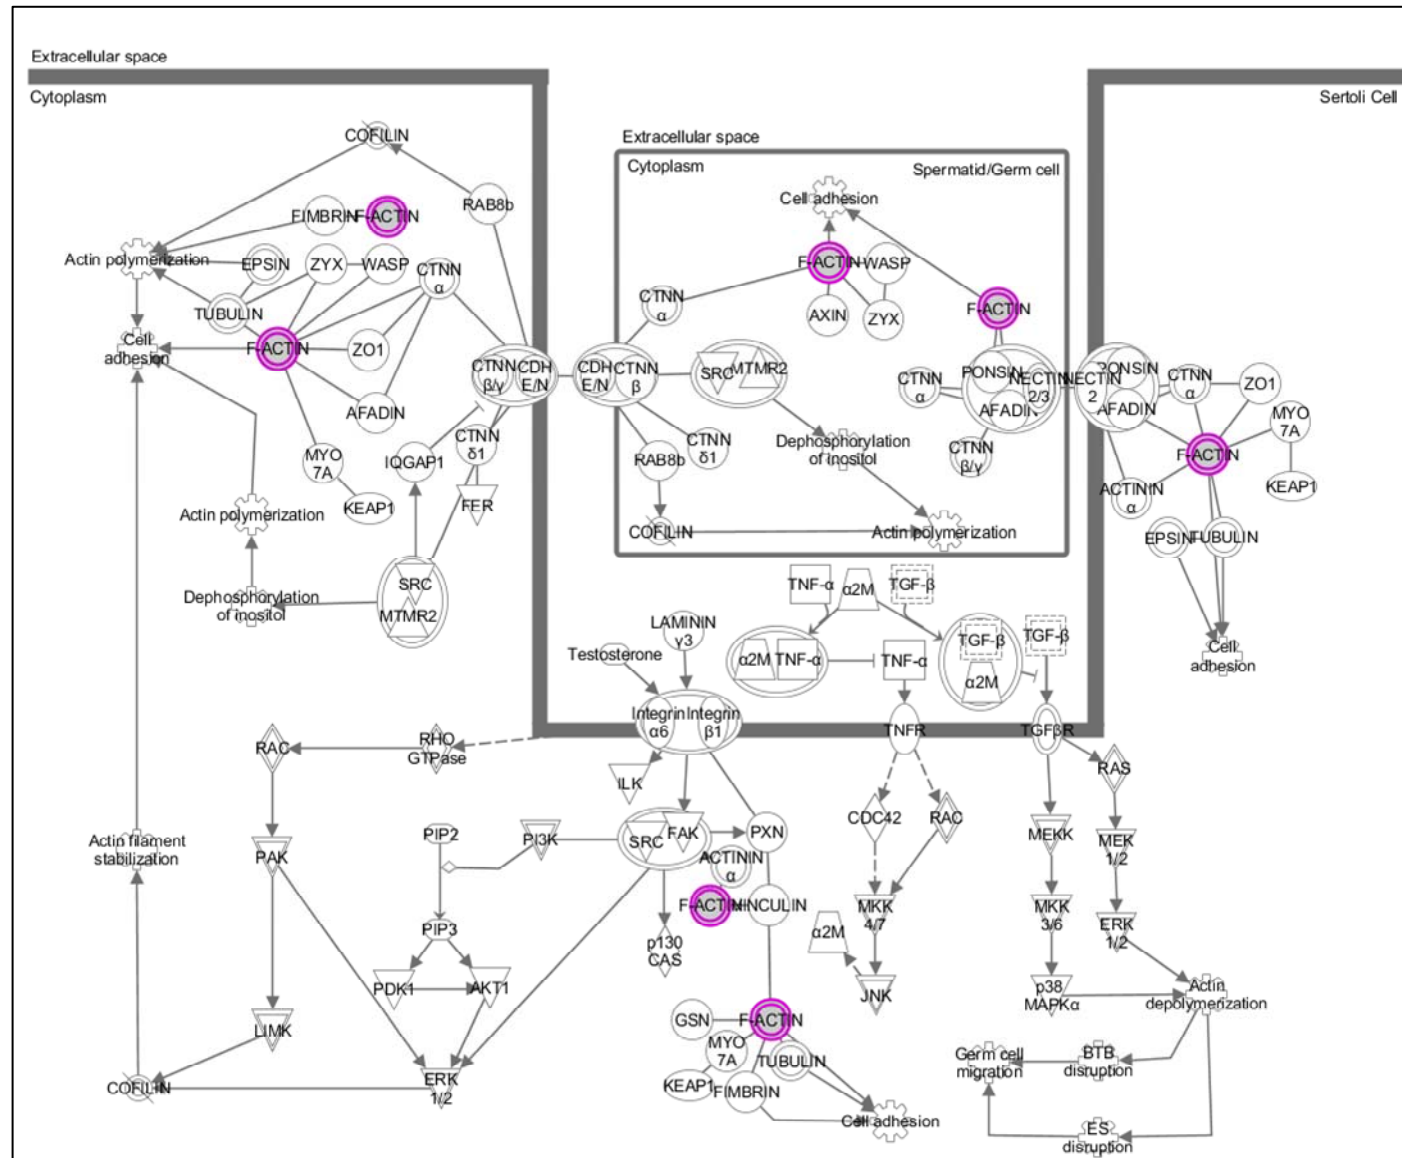

## 22-Tight junction signaling

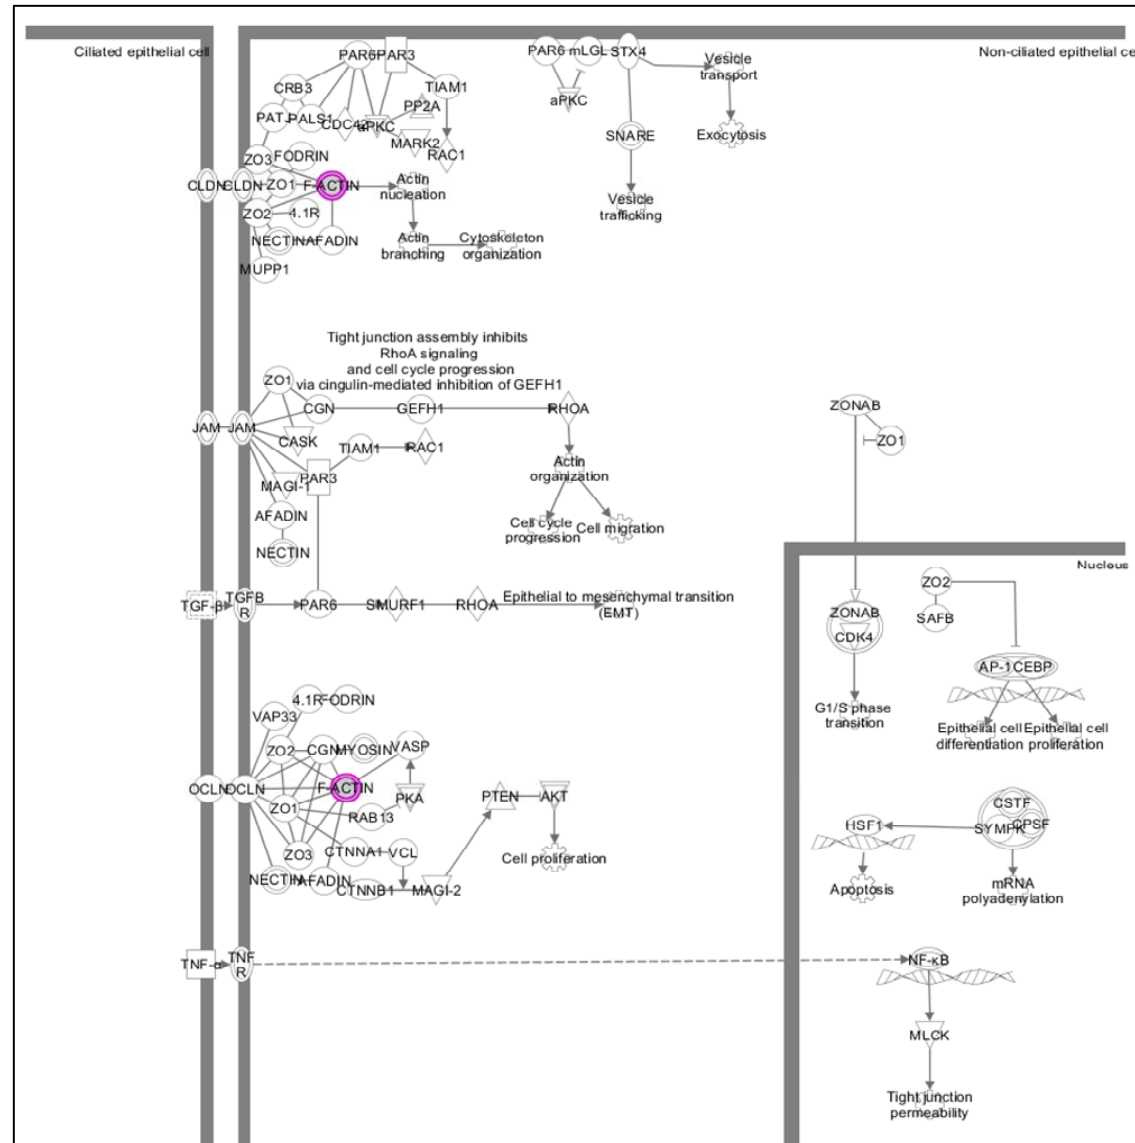

## 23-RhoGDI signaling

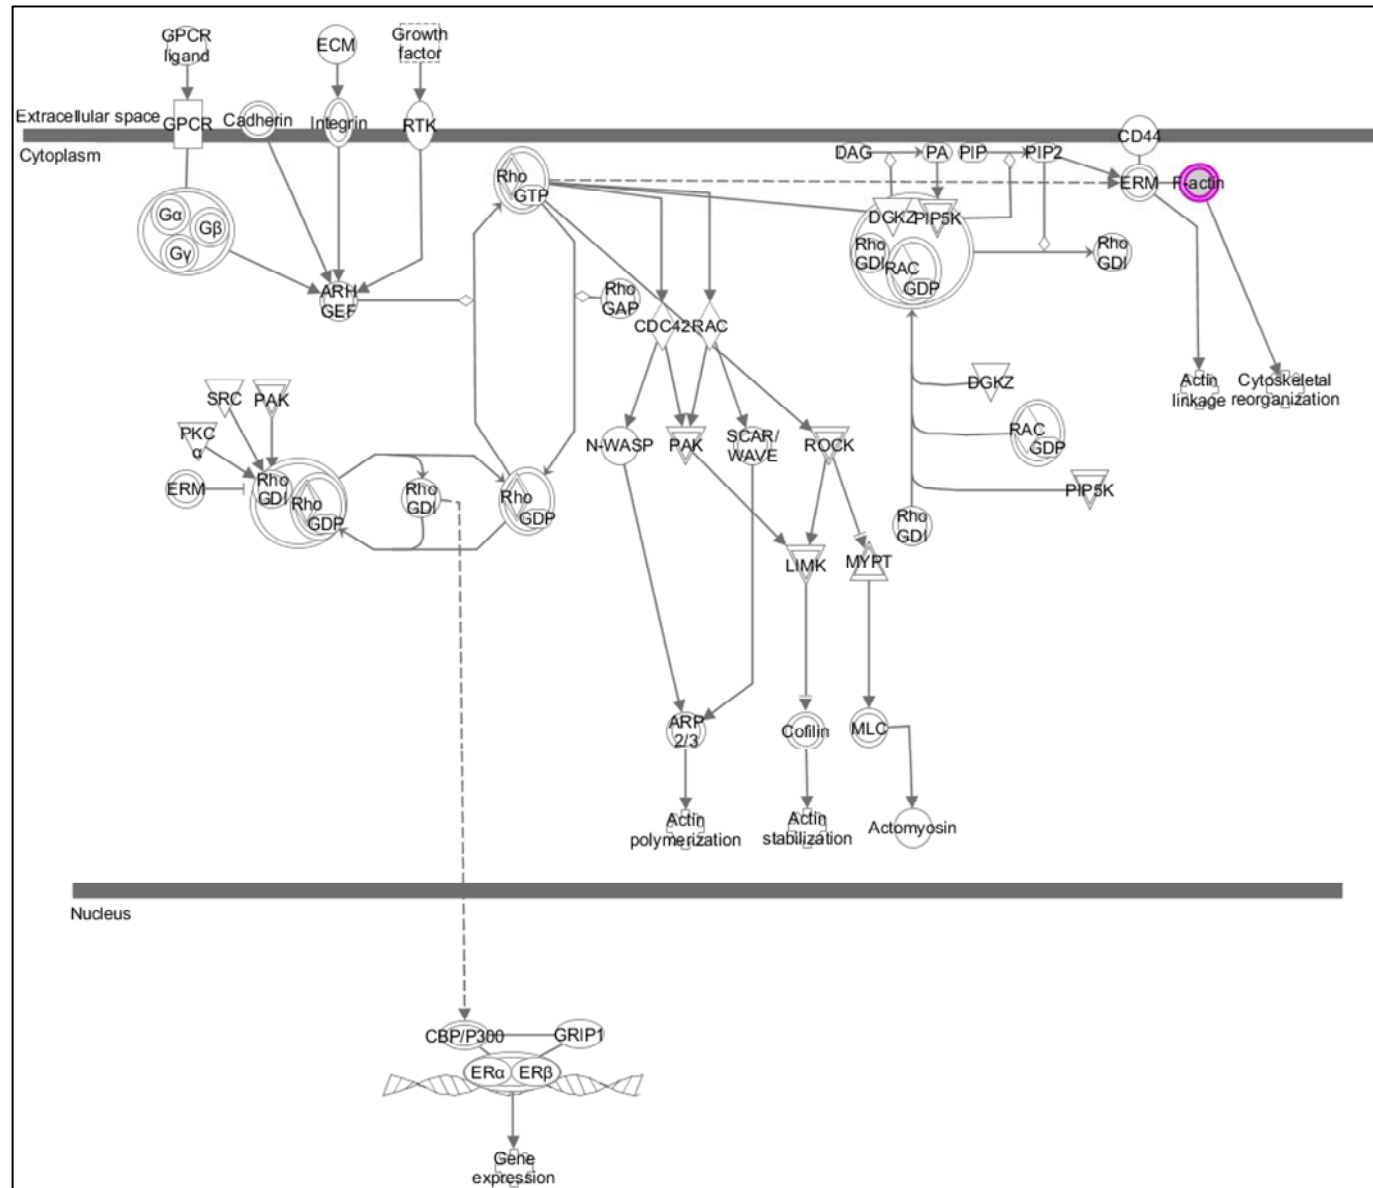



## 25-ILK signaling

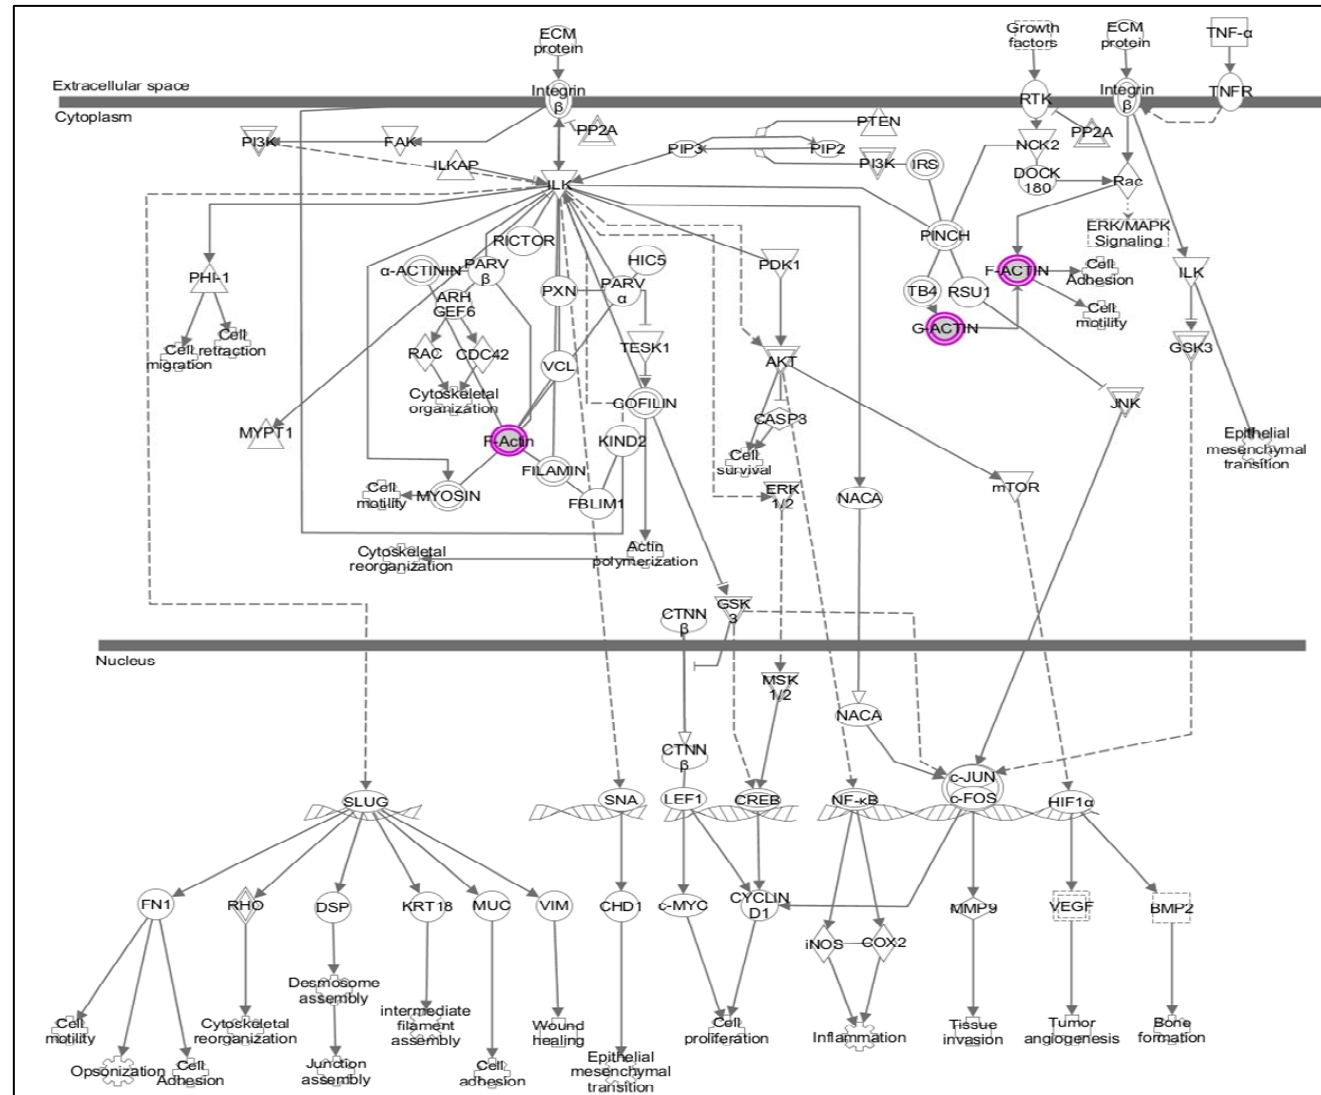

## 26-Agranulocyte adhesion and diapedesis

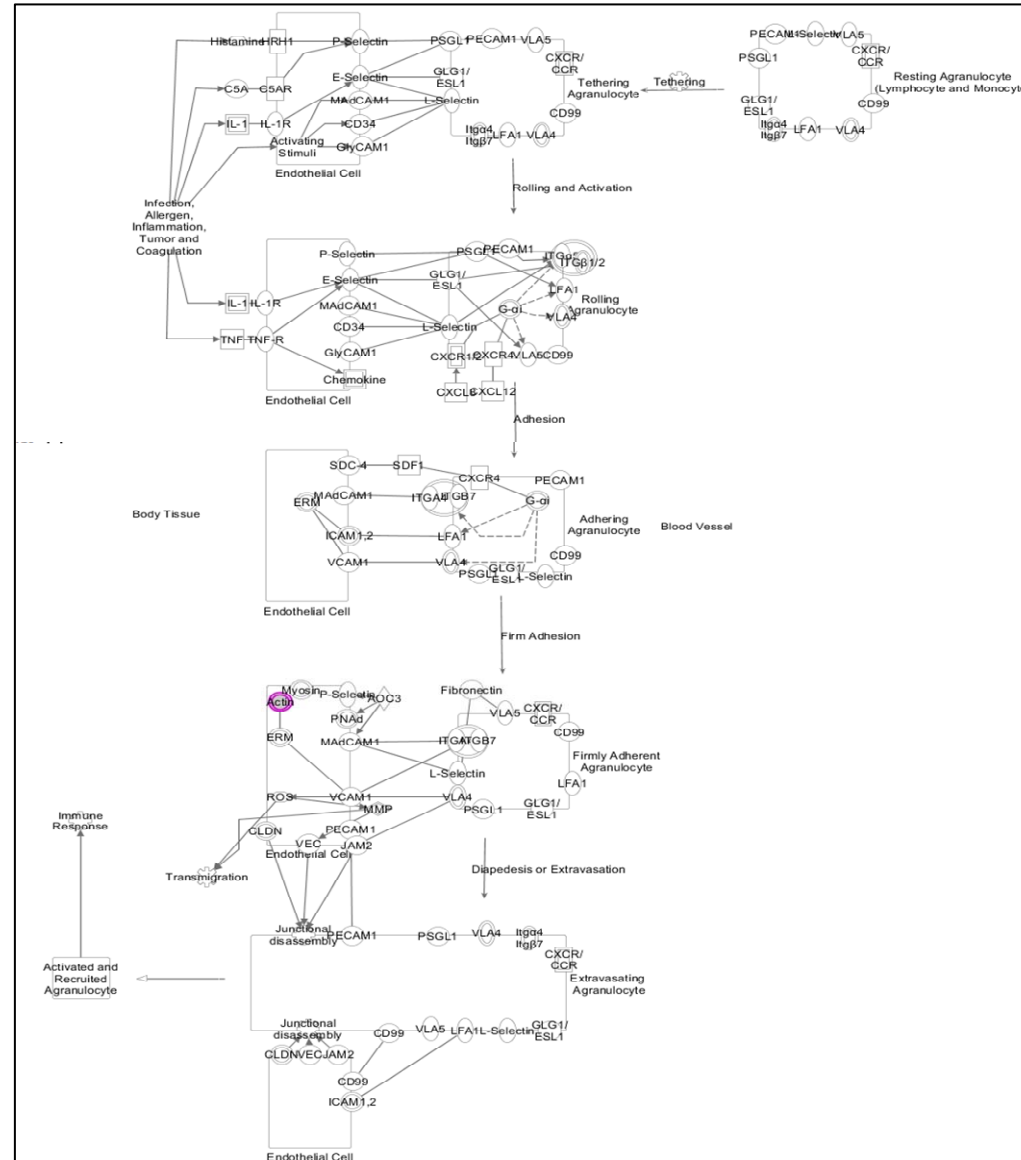

## 27-Integrin signaling

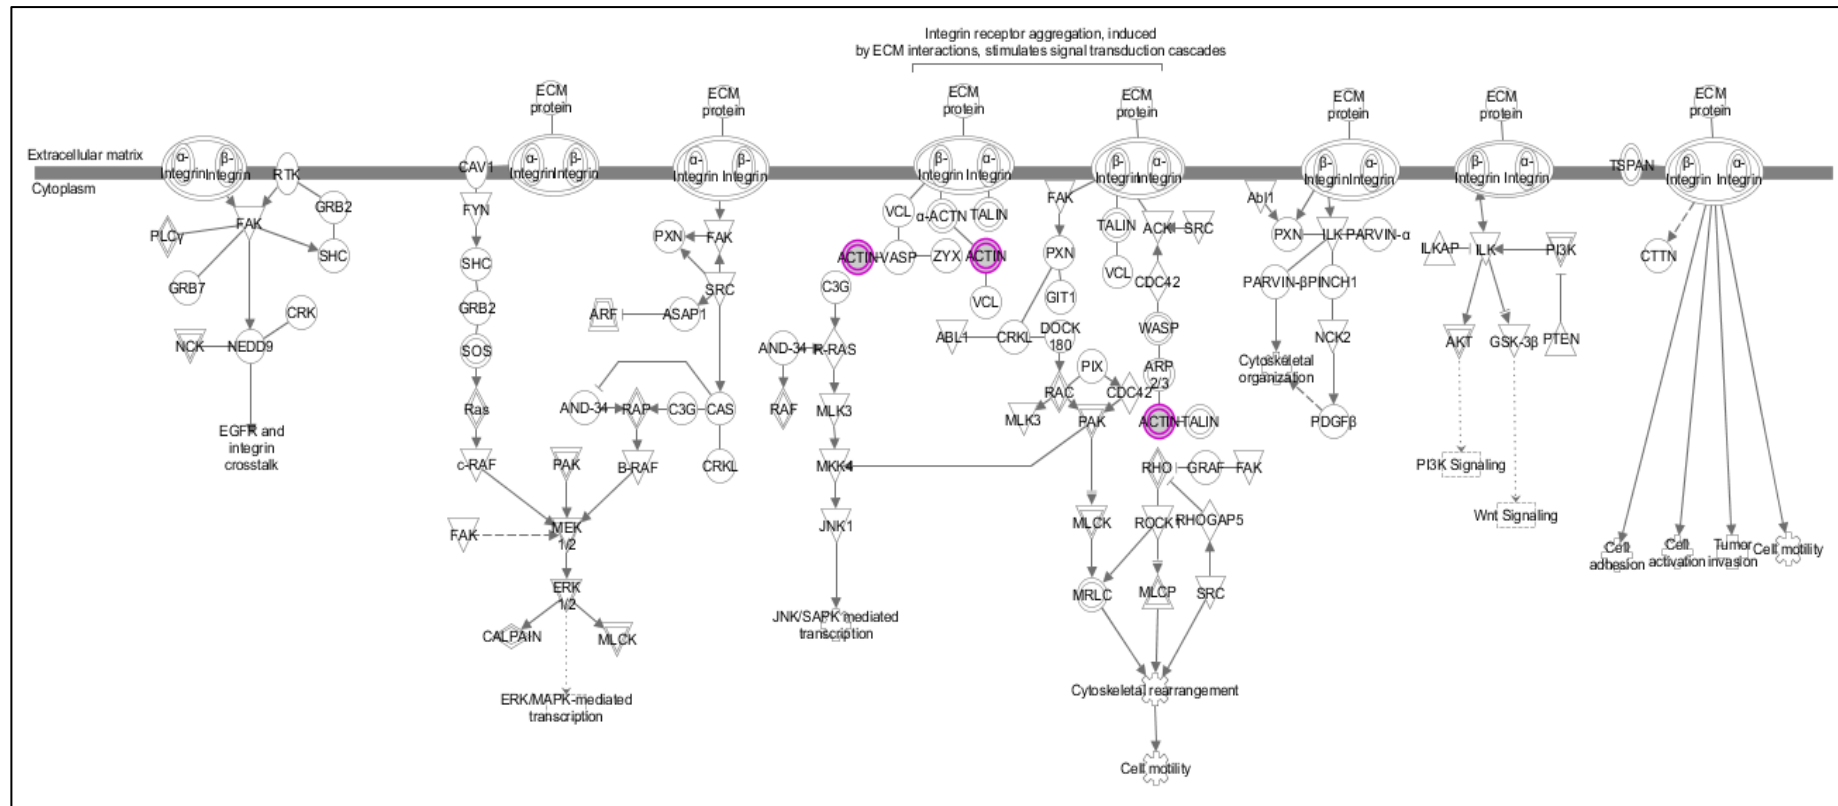

## 28-Leukocyte extravasation signaling

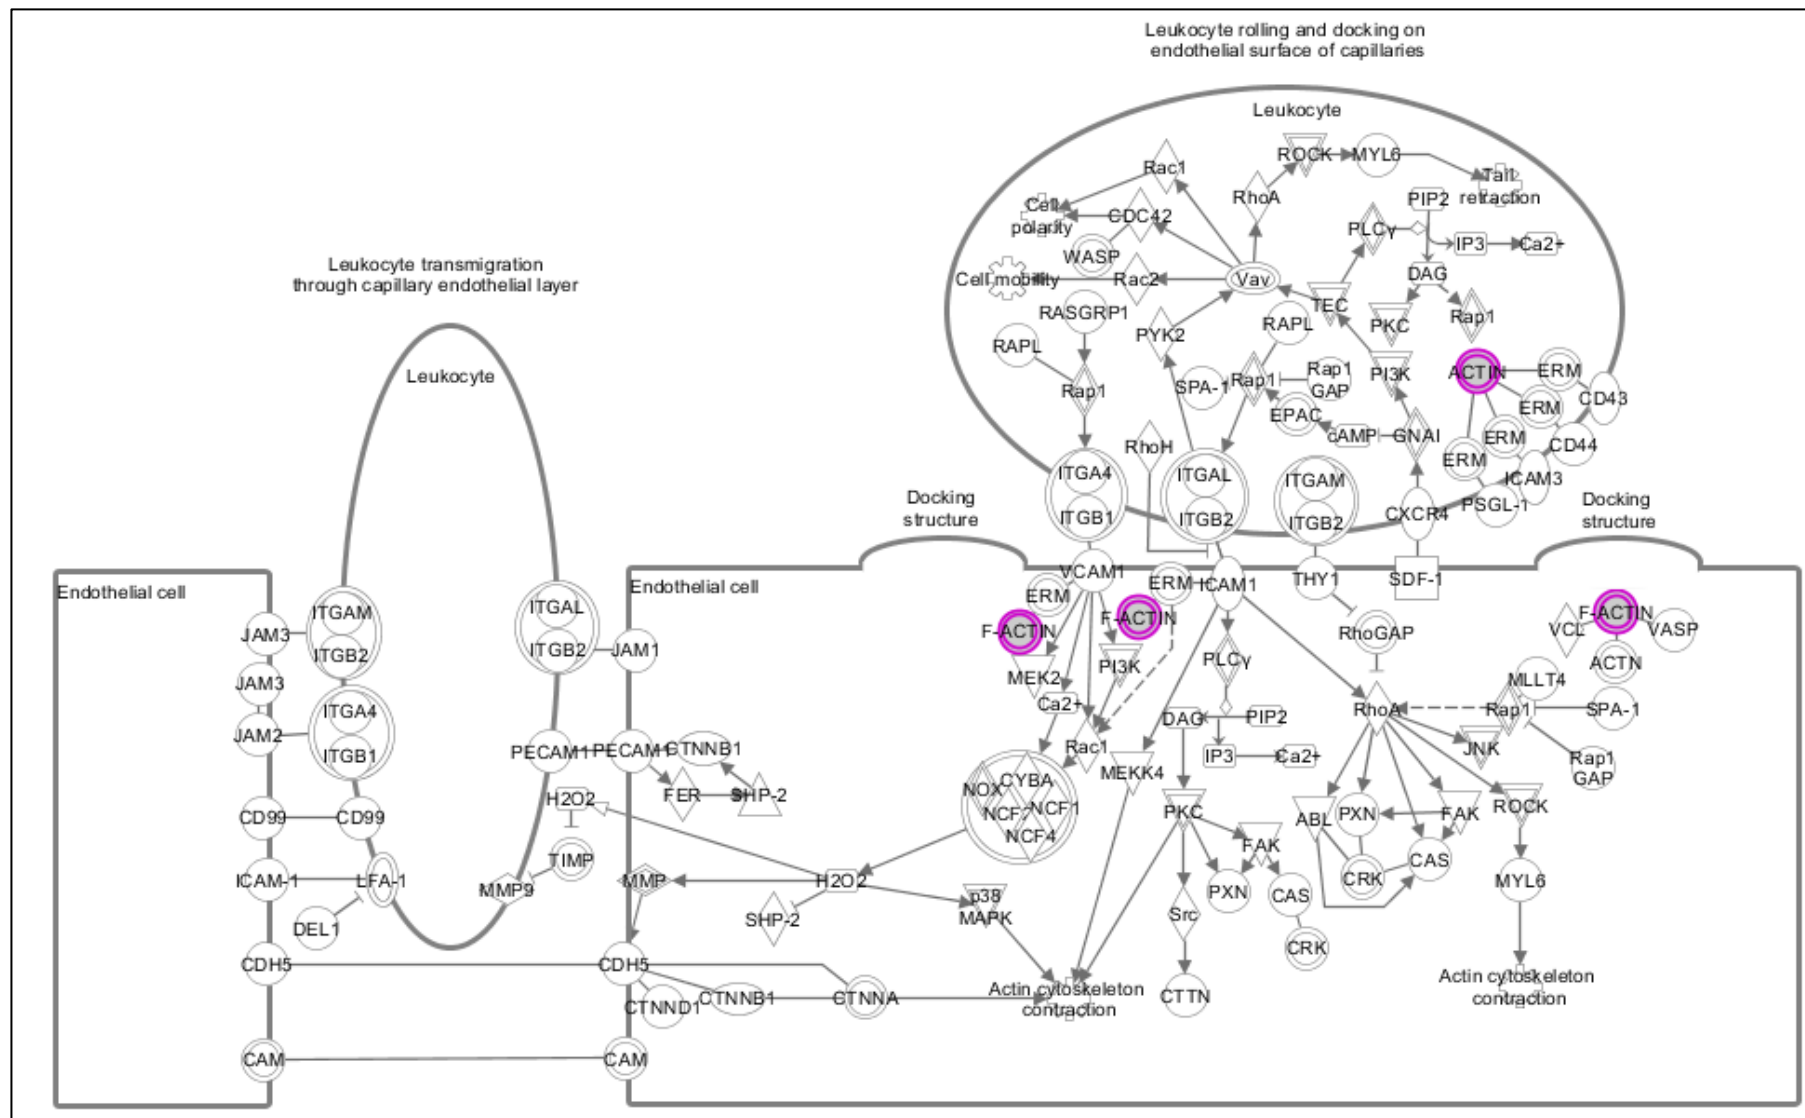

## 29-Actin cytoskeleton signaling

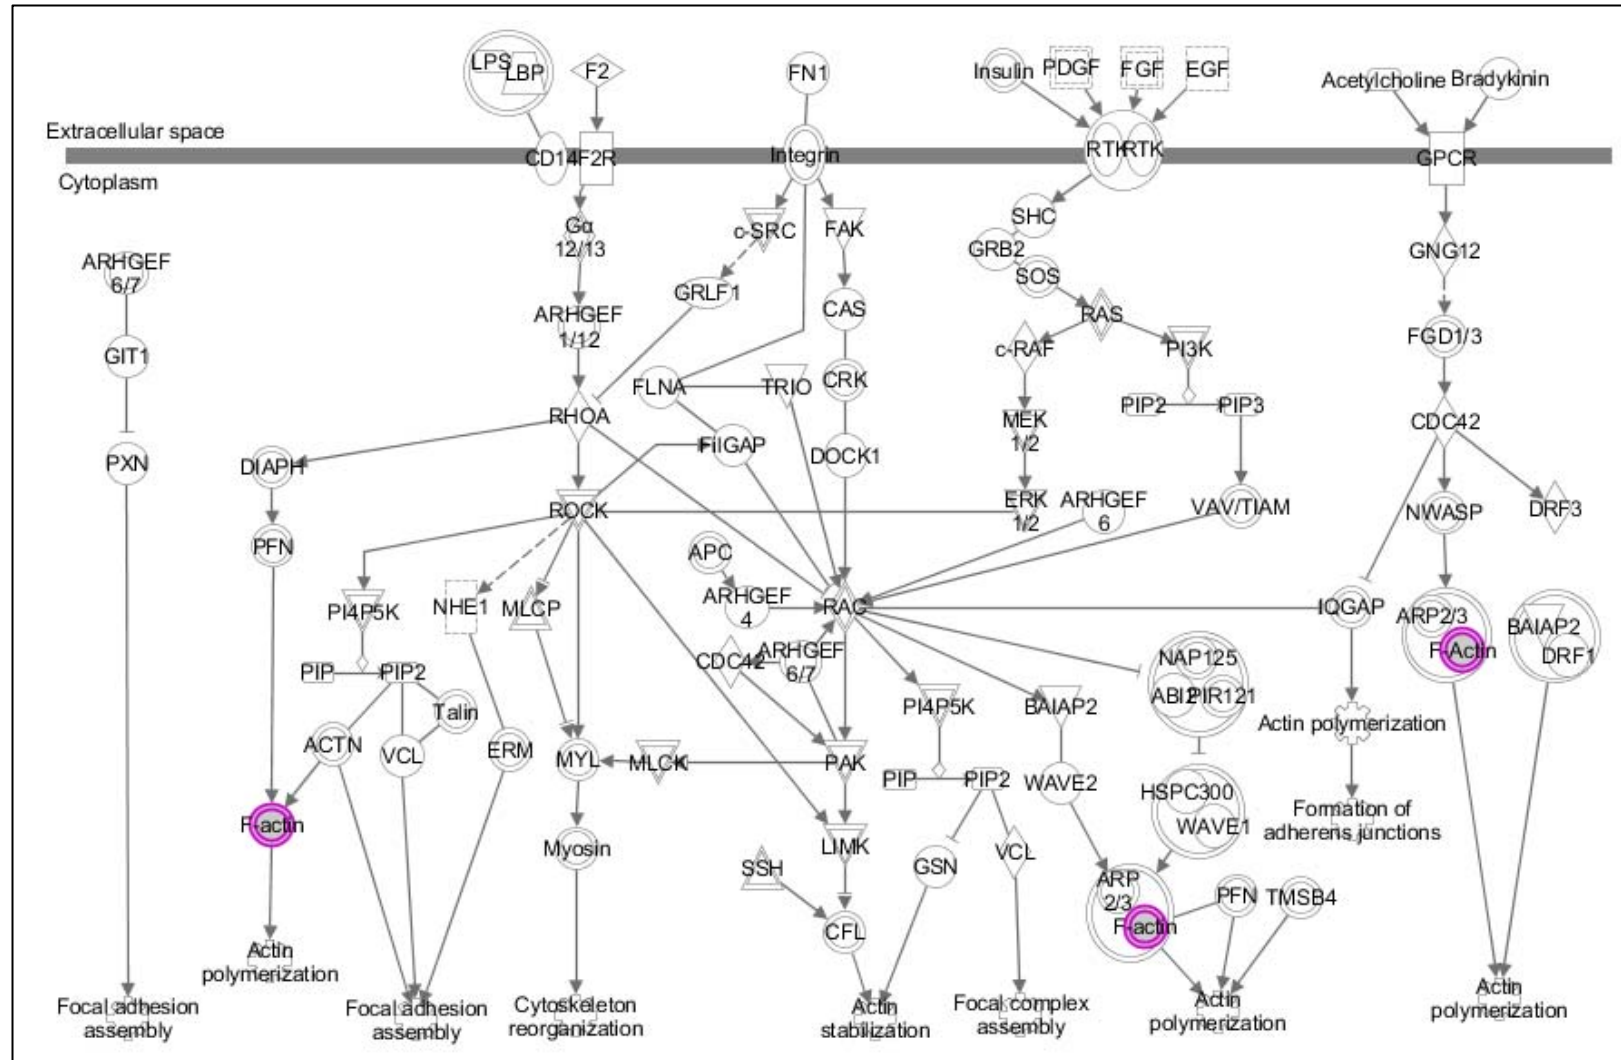

## 30-Signaling by Rho family GTPases

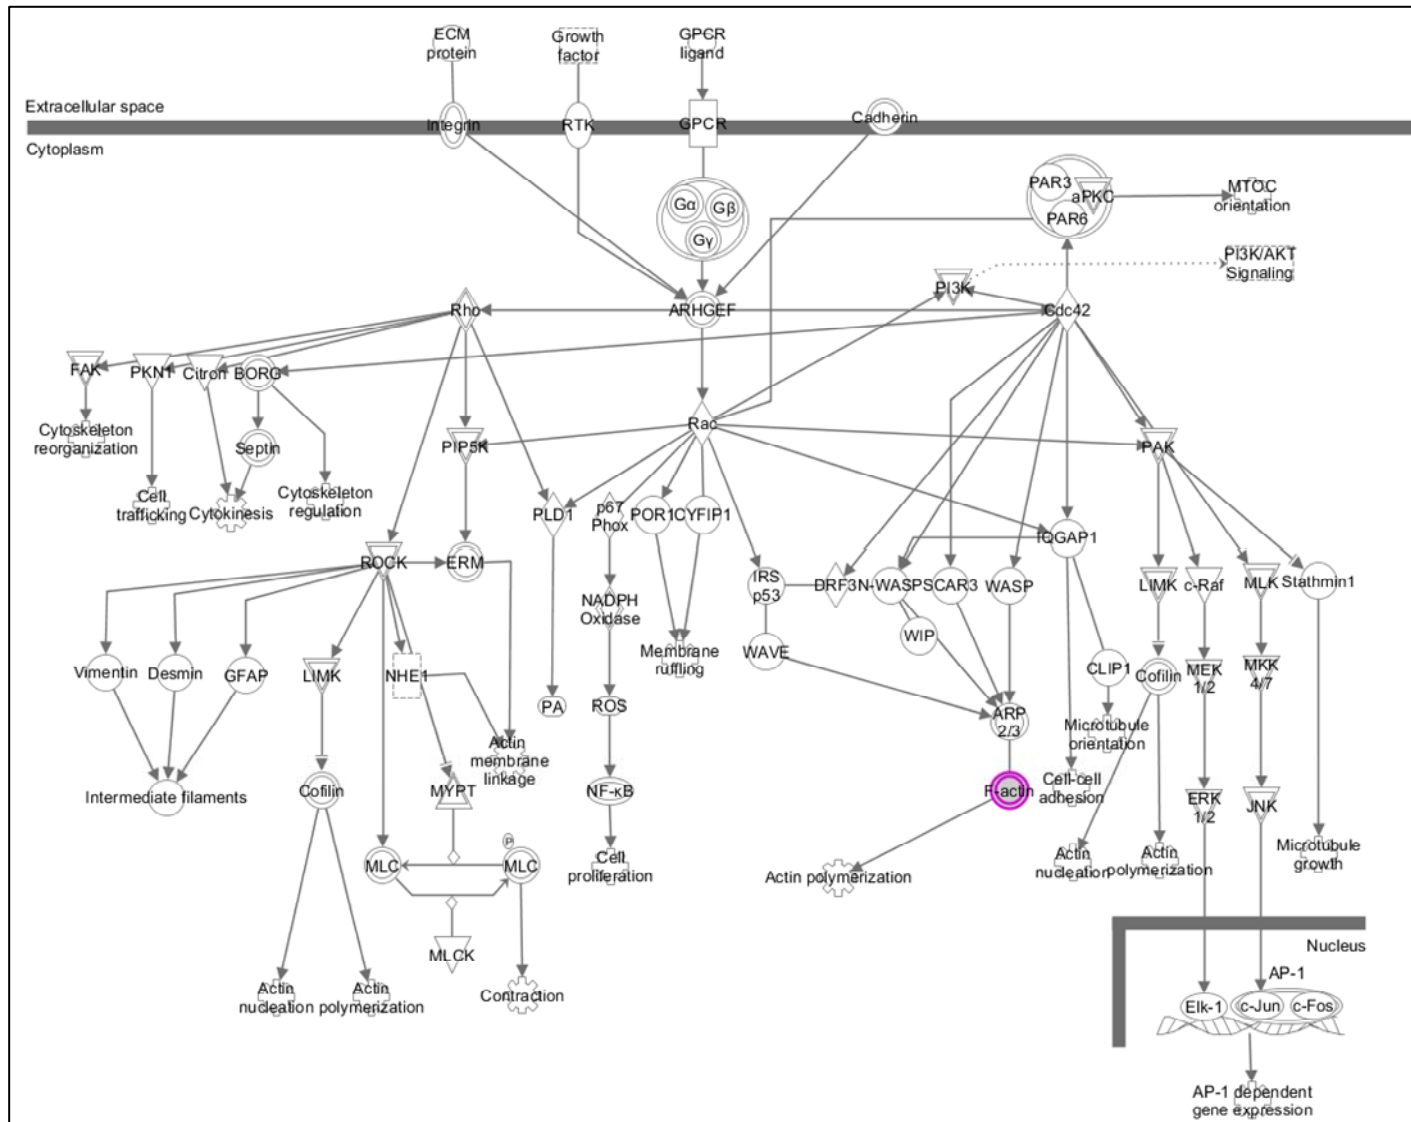

## 31-Calcium signaling

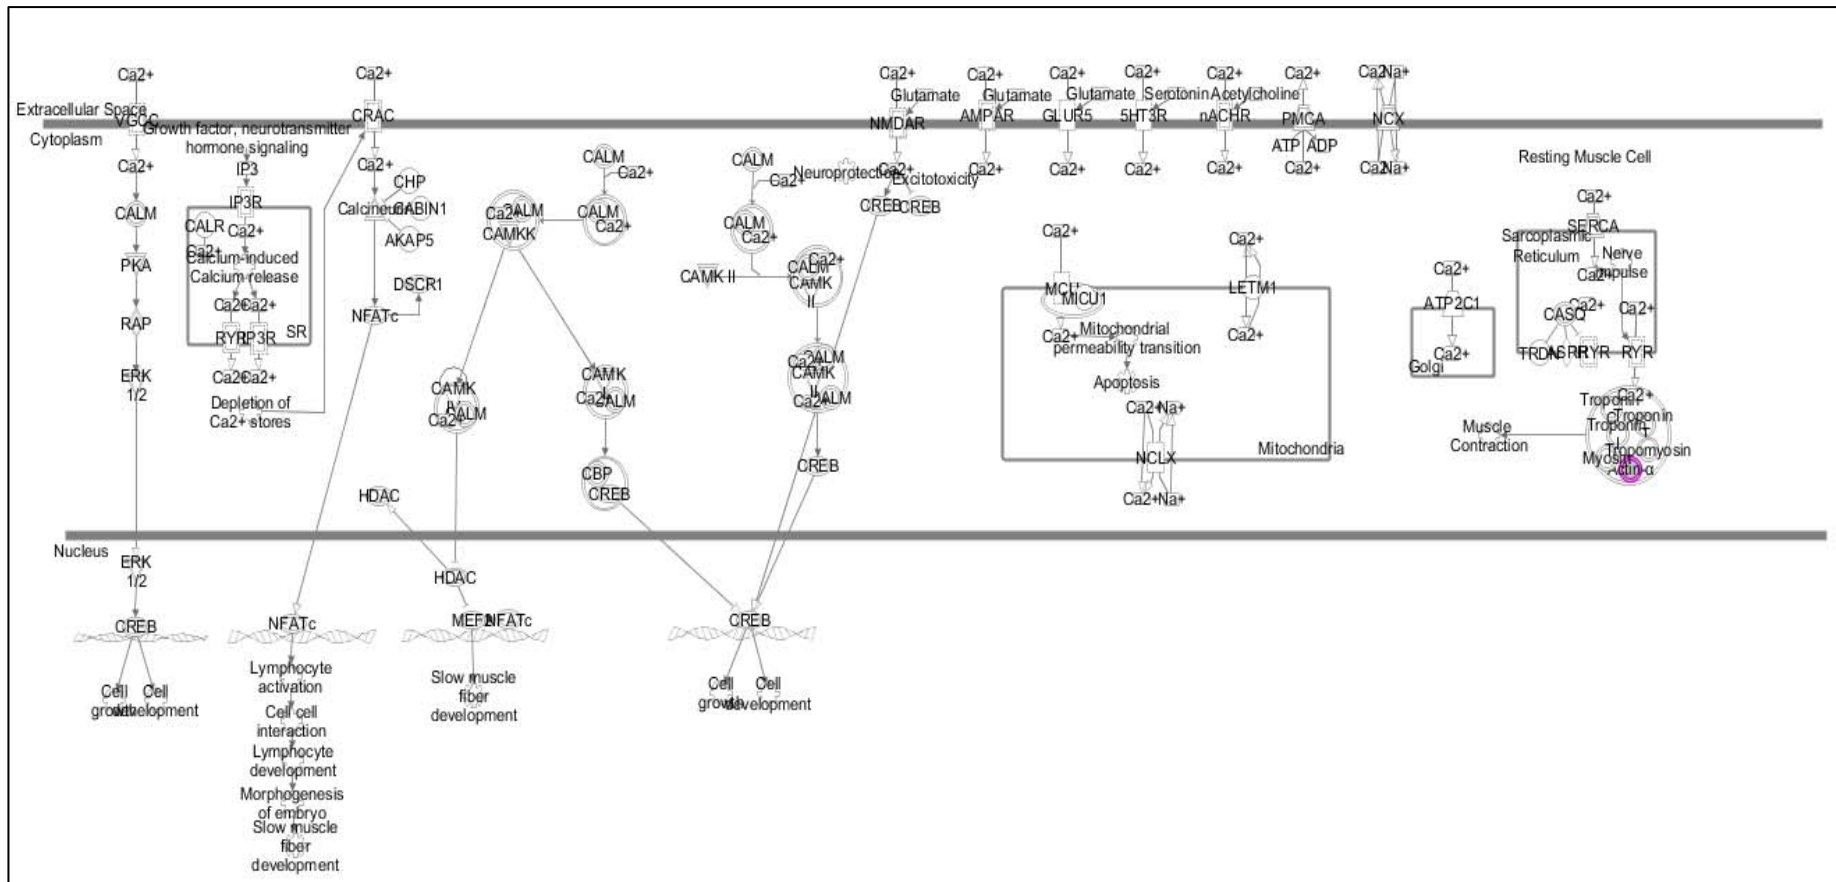

The diagram illustrates the ubiquitin-proteasome system, showing the biochemical pathways for ubiquitination and the subsequent degradation of target proteins.

**Ubiquitin Activation and E2-Ubiquitin Conjugation:**

- Ubiquitin (Ub) is activated by E1 (ubiquitin-activating enzyme) using ATP, forming a thioester bond with E1.
- E1 transfers Ub to E2 (ubiquitin-conjugating enzyme), forming an E2-Ub conjugate.

**E3 Complexes and Ubiquitination Pathways:**

- RING E3 Complex:** E2-Ub transfers Ub to the RING E3 complex, leading to ubiquitination chain elongation. This pathway is associated with the formation of K48-linked ubiquitin chains.
- U-box E3 Complex:** E2-Ub transfers Ub to the U-box E3 complex, leading to ubiquitination chain elongation. This pathway is associated with the formation of M1-linked ubiquitin chains.
- Other E3 Complexes:** E2-Ub can also transfer Ub to other E3 complexes, such as the E3 complex associated with the RING E3 complex, leading to ubiquitination chain elongation.

**Ubiquitination Chain Elongation:**

- Ubiquitination chain elongation involves the sequential addition of Ub molecules to the target protein, forming a polyubiquitinated target protein.
- The ubiquitinated target protein is then degraded by the 26S proteasome (PA700/20S) into peptides.

**Proteasome and Ubiquitin Linkage:**

- The 26S proteasome (PA700/20S) is a large, multi-subunit complex responsible for degrading ubiquitinated target proteins.
- The ubiquitin linkage (K48) is a key determinant of the target protein's fate, leading to degradation by the 26S proteasome.

**Regulation of Processes:**

- Ubiquitination is involved in various cellular processes, including DNA repair, apoptosis, endocytosis of cell surface receptors, and regulation of processes.
- Ubiquitination is also involved in the regulation of the ubiquitin-proteasome system itself, including the regulation of E1, E2, and E3 complexes.

**Antigen Presentation Pathway:**

- Ubiquitinated target proteins are degraded by the 26S proteasome into peptides.
- These peptides are then processed by the immunoproteasome (PA28/20S) into peptide fragments.
- The peptide fragments are then presented by MHC class I molecules in the ER for an inflammatory response.

### 33-Nitric oxide signaling in the cardiovascular system

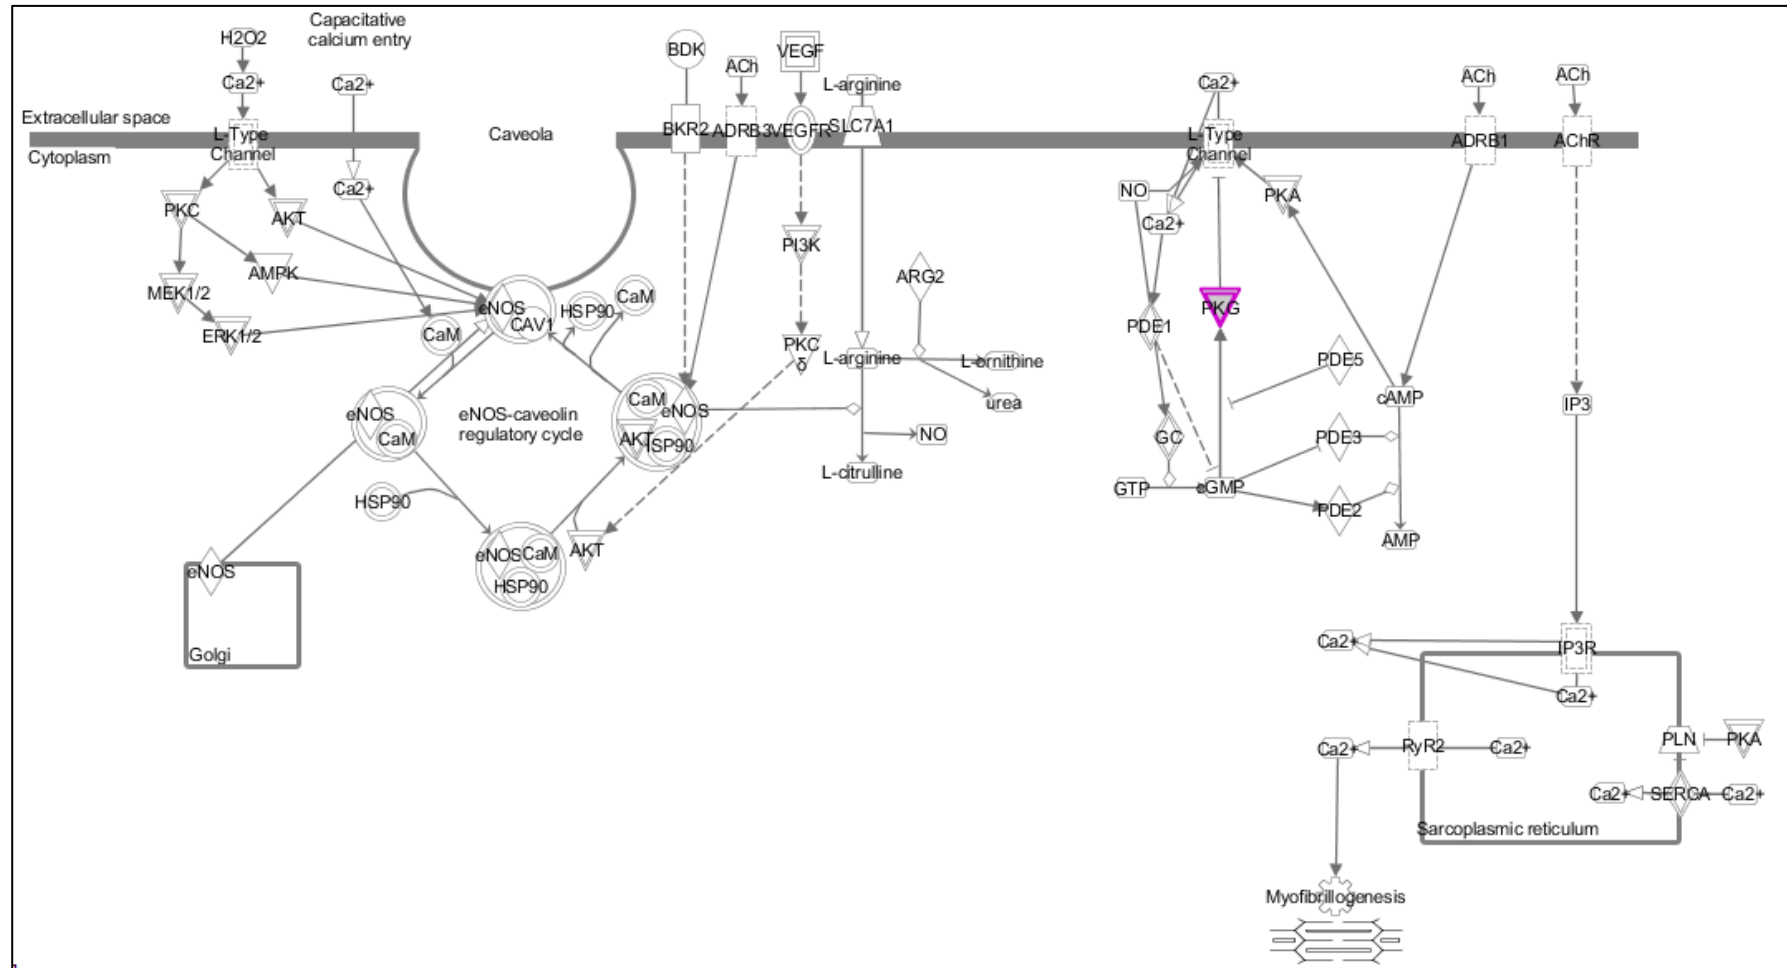

Supplement: Supplementary file 5 [file Presentation_5.zip › Supplemental materials 8.3.pdf]
