# Supplementary material for: Multiomics-Based Signaling Pathway Network Alterations in Human Non-functional Pituitary Adenomas
Source: Front Endocrinol (Lausanne). 2019 Dec 17;10:835. doi: 10.3389/fendo.2019.00835 (PMC6928143; doi:10.3389/fendo.2019.00835)

Supplemental materials 9.1 Phosphoproteins from pituitary controls for IPA analysis (Dataset 9)

| ID     | Notes | Molecules | Description                                   | Location            | Function      | Drug |
|--------|-------|-----------|-----------------------------------------------|---------------------|---------------|------|
| O15530 |       | PDPK1     | 3-phosphoinositide dependent protein kinase 1 | Cytoplasm           | kinase        |      |
| P01189 |       | POMC      | proopiomelanocortin                           | Extracellular Space | other         |      |
| P01241 |       | GH1       | growth hormone 1                              | Extracellular Space | growth factor |      |
| P02671 |       | FGA       | fibrinogen alpha chain                        | Extracellular Space | other         | F2   |
| P04004 |       | VTN       | vitronectin                                   | Extracellular Space | other         |      |
| P05060 |       | CHGB      | chromogranin B (secretogranin 1)              | Extracellular Space | other         |      |
| P05386 |       | RPLP1     | ribosomal protein, large, P1                  | Cytoplasm           | other         |      |
| P05387 | D     | RPLP2*    | ribosomal protein, large, P2                  | Cytoplasm           | other         |      |
| P05387 | D     | RPLP2*    | ribosomal protein, large, P2                  | Cytoplasm           | other         |      |
| P05388 |       | RPLP0     | ribosomal protein, large, P0                  | Cytoplasm           | other         |      |

|        |          |                                                                                        |                     |                       |                                                   |
|--------|----------|----------------------------------------------------------------------------------------|---------------------|-----------------------|---------------------------------------------------|
| P07900 | HSP90AA1 | heat shock protein 90kDa alpha (cytosolic), class A member 1                           | Cytoplasm           | enzyme                | alvespimycin, retaspimycin, luminespib, cisplatin |
| P07910 | HNRNPC   | heterogeneous nuclear ribonucleoprotein C (C1/C2)                                      | Nucleus             | other                 |                                                   |
| P10451 | SPP1     | secreted phosphoprotein 1                                                              | Extracellular Space | cytokine              |                                                   |
| P10645 | CHGA     | chromogranin A (parathyroid secretory protein 1)                                       | Cytoplasm           | other                 |                                                   |
| P13521 | SCG2     | secretogranin II                                                                       | Extracellular Space | cytokine              |                                                   |
| P13861 | PRKAR2A  | protein kinase, cAMP-dependent, regulatory, type II, alpha                             | Cytoplasm           | kinase                |                                                   |
| P22466 | GAL      | galanin/GMAP prepropeptide                                                             | Extracellular Space | other                 |                                                   |
| P23396 | RPS3     | ribosomal protein S3                                                                   | Cytoplasm           | enzyme                |                                                   |
| P29692 | EEF1D    | eukaryotic translation elongation factor 1 delta (guanine nucleotide exchange protein) | Cytoplasm           | translation regulator |                                                   |
| P35221 | CTNNA1   | catenin (cadherin-associated protein), alpha 1, 102kDa                                 | Plasma Membrane     | other                 |                                                   |
| P50502 | ST13     | suppression of tumorigenicity 13 (colon carcinoma) (Hsp70 interacting protein)         | Cytoplasm           | other                 |                                                   |
| P51858 | HDGF     | hepatoma-derived growth factor                                                         | Extracellular Space | growth factor         |                                                   |

|        |          |                                                     |                 |        |
|--------|----------|-----------------------------------------------------|-----------------|--------|
| P60174 | TPI1     | triosephosphate isomerase 1                         | Cytoplasm       | enzyme |
| Q01518 | CAP1     | CAP, adenylate cyclase-associated protein 1 (yeast) | Plasma Membrane | other  |
| Q15019 | Septin2  | septin 2                                            | Cytoplasm       | enzyme |
| Q15185 | PTGES3   | prostaglandin E synthase 3 (cytosolic)              | Cytoplasm       | enzyme |
| Q9H3Z4 | DNAJC5   | DnaJ (Hsp40) homolog, subfamily C, member 5         | Plasma Membrane | other  |
| Q9UKM9 | RALY     | RALY heterogeneous nuclear ribonucleoprotein        | Nucleus         | other  |
| P62805 | unmapped |                                                     |                 |        |

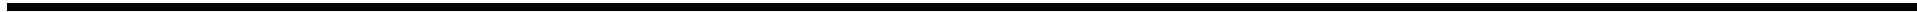

Supplement: Supplementary file 5 [file Presentation_5.zip › Supplemental materials 9.1.pdf]
