# Supplementary material for: Multiomics-Based Signaling Pathway Network Alterations in Human Non-functional Pituitary Adenomas
Source: Front Endocrinol (Lausanne). 2019 Dec 17;10:835. doi: 10.3389/fendo.2019.00835 (PMC6928143; doi:10.3389/fendo.2019.00835)

**Supplemental materials 9.3**  
**Statistically significant canonical pathways derived from phosphoproteins from pituitary controls**  
**for IPA analysis (Dataset 9)**

1. EIF2 signaling
2. Telomerase signaling
3. eNOS signaling
4. Aldosterone signaling in epithelial cells
5. PPARa\_RXRa activation
6. Endometrial cancer signaling
7. Growth hormone signaling
8. Leptin signaling in obesity
9. Glucocorticoid receptor signaling
10. Melanocyte development and pigmentation signaling
11. Prostate cancer signaling
12. TR\_RXR activation
13. Neuregulin signaling
14. G beta gamma signaling
15. IGF-1 signaling
16. Nitric oxide signaling in cardiovascular system
17. Androgen signaling
18. Corticotropin releasing hormone signaling
19. LXR\_RXR activation
20. PI3K\_AKT signaling
21. FXR\_RXR activation
22. Insulin receptor signaling
23. Aryl hydrocarbon receptor signaling
24. AMPK signaling
25. Regulation of eIF4 and p70S6K signaling
26. Germ cell-sertoli cell junction signaling
27. Prostanoid biosynthesis
28. Tight junction signaling
29. Acute phase response signaling
30. RAR activation
31. Extrinsic prothrombin activation pathway
32. Sertoli cell-sertoli cell junction signaling
33. Sucrose degradation V (mammalian)
34. mTOR signaling
35. Huntington's disease signaling
36. Intrinsic prothrombin activation pathway
37. Sonic hedgehog signaling
38. Protein ubiquitination pathway
39. Coagulation system
40. Role of JAK2 in hormone-like cytokine signaling
41. G-protein coupled receptor signaling
42. Xenobiotic metabolism signaling
43. Glycolysis I

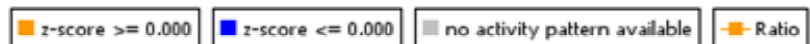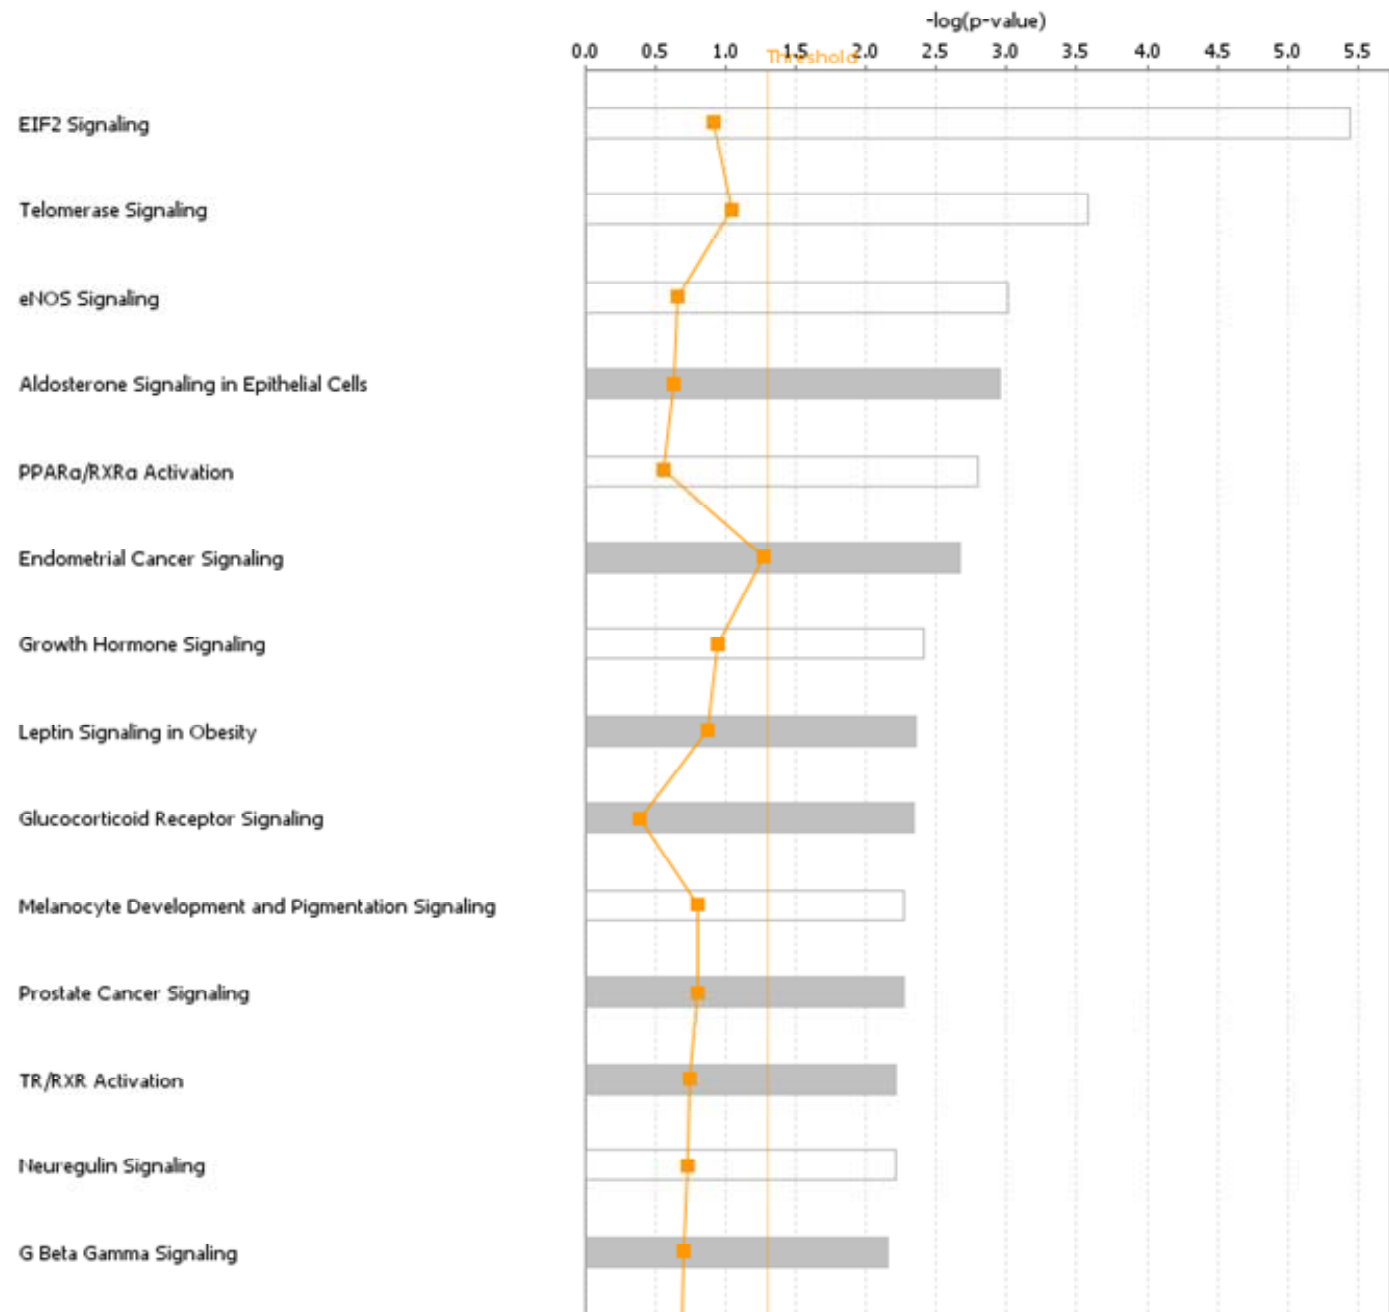



## 2-Telomerase signaling

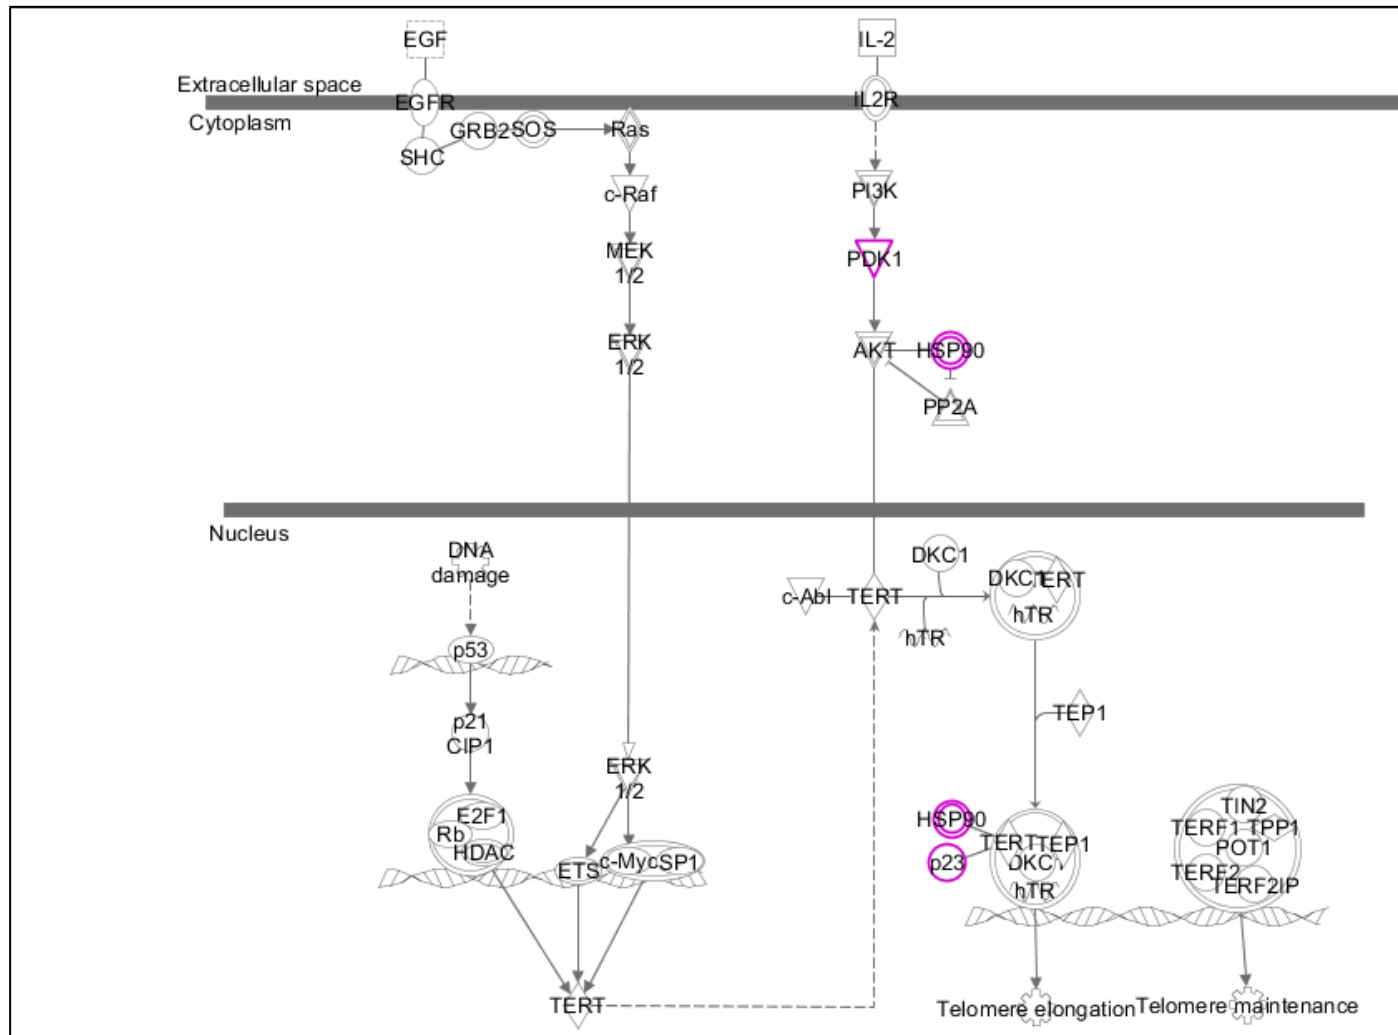

### 3-eNOS signaling

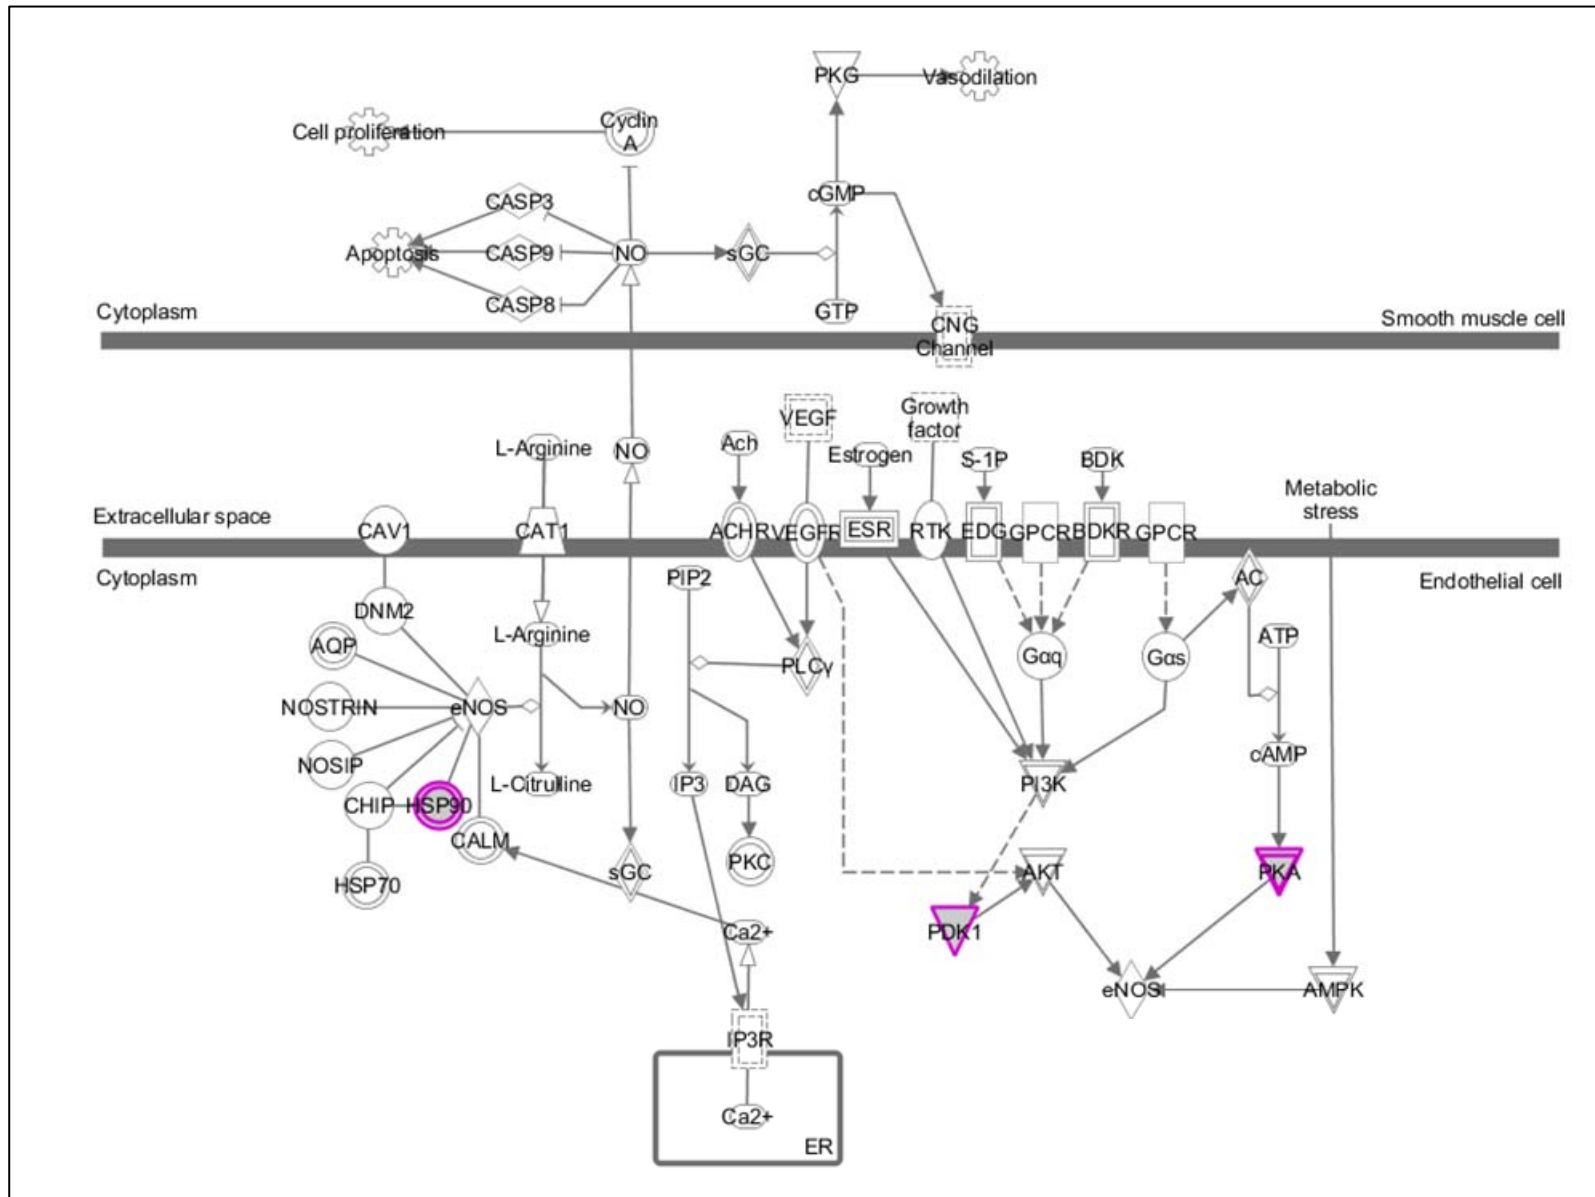

## 4-Aldosterone signaling in epithelial cells

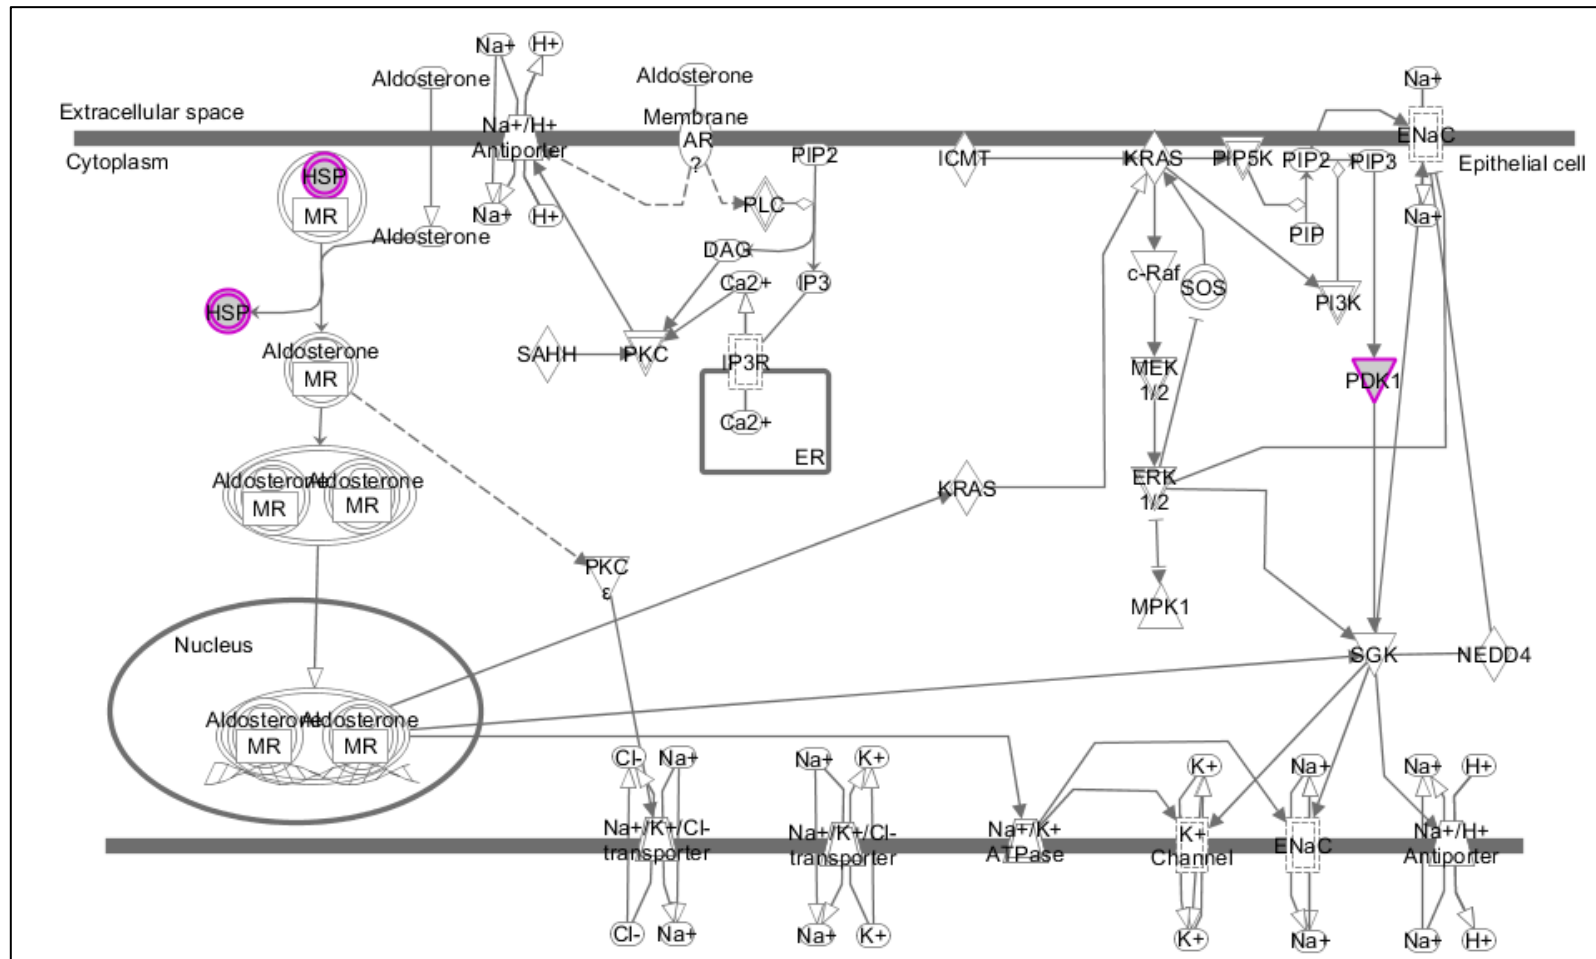

[illegible]

## 6-Endometrial cancer signaling

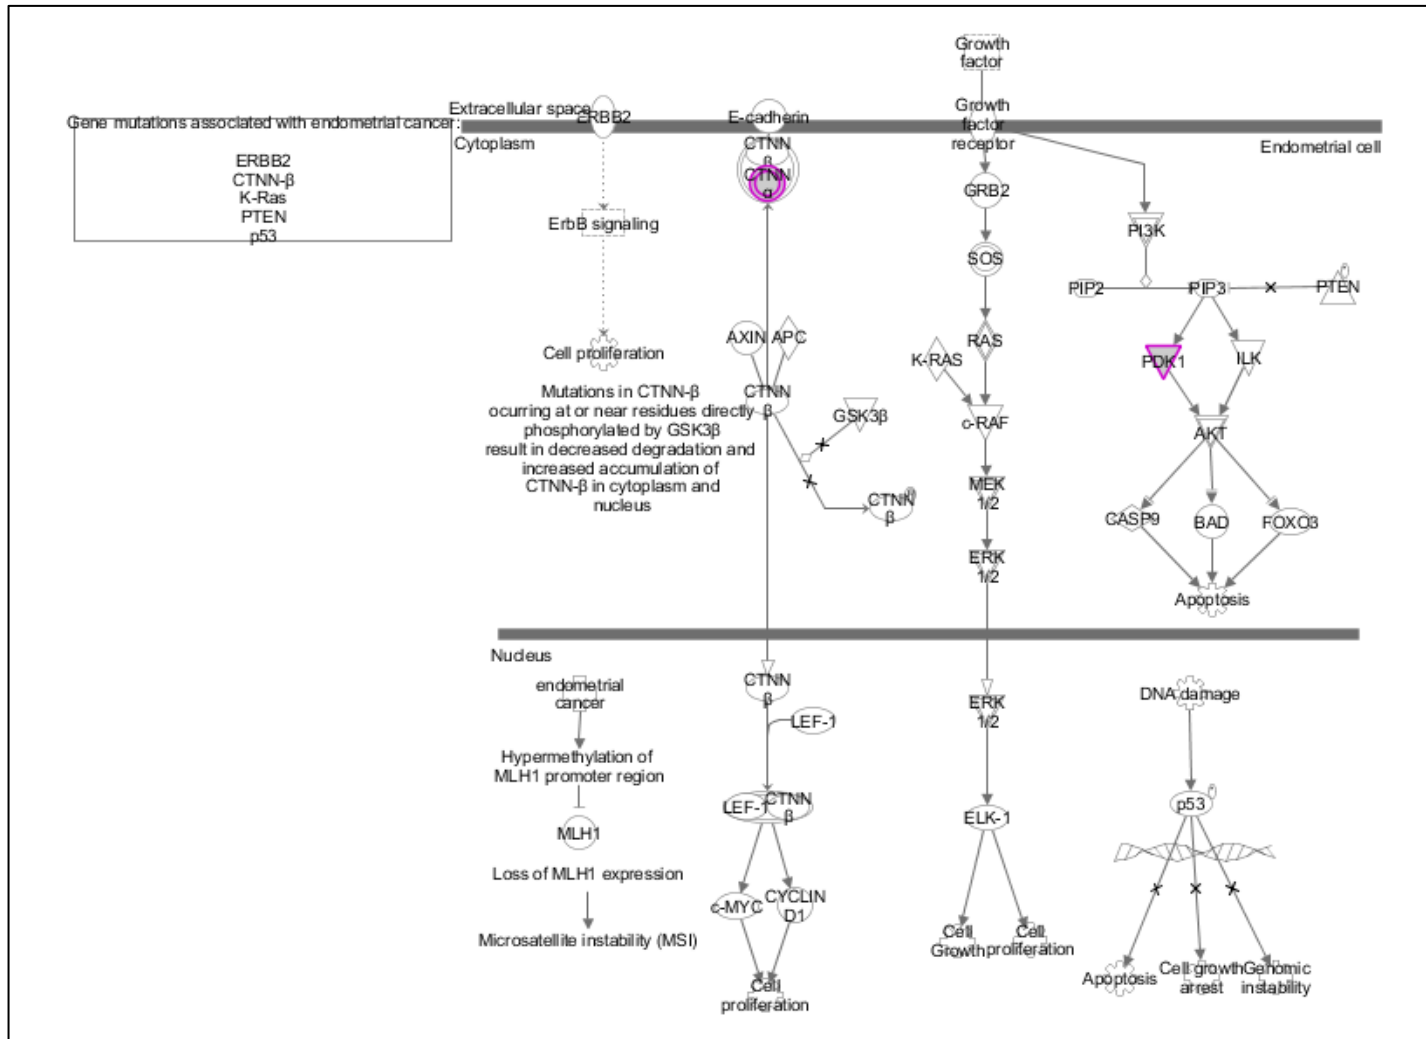

## 7-Growth hormone signaling

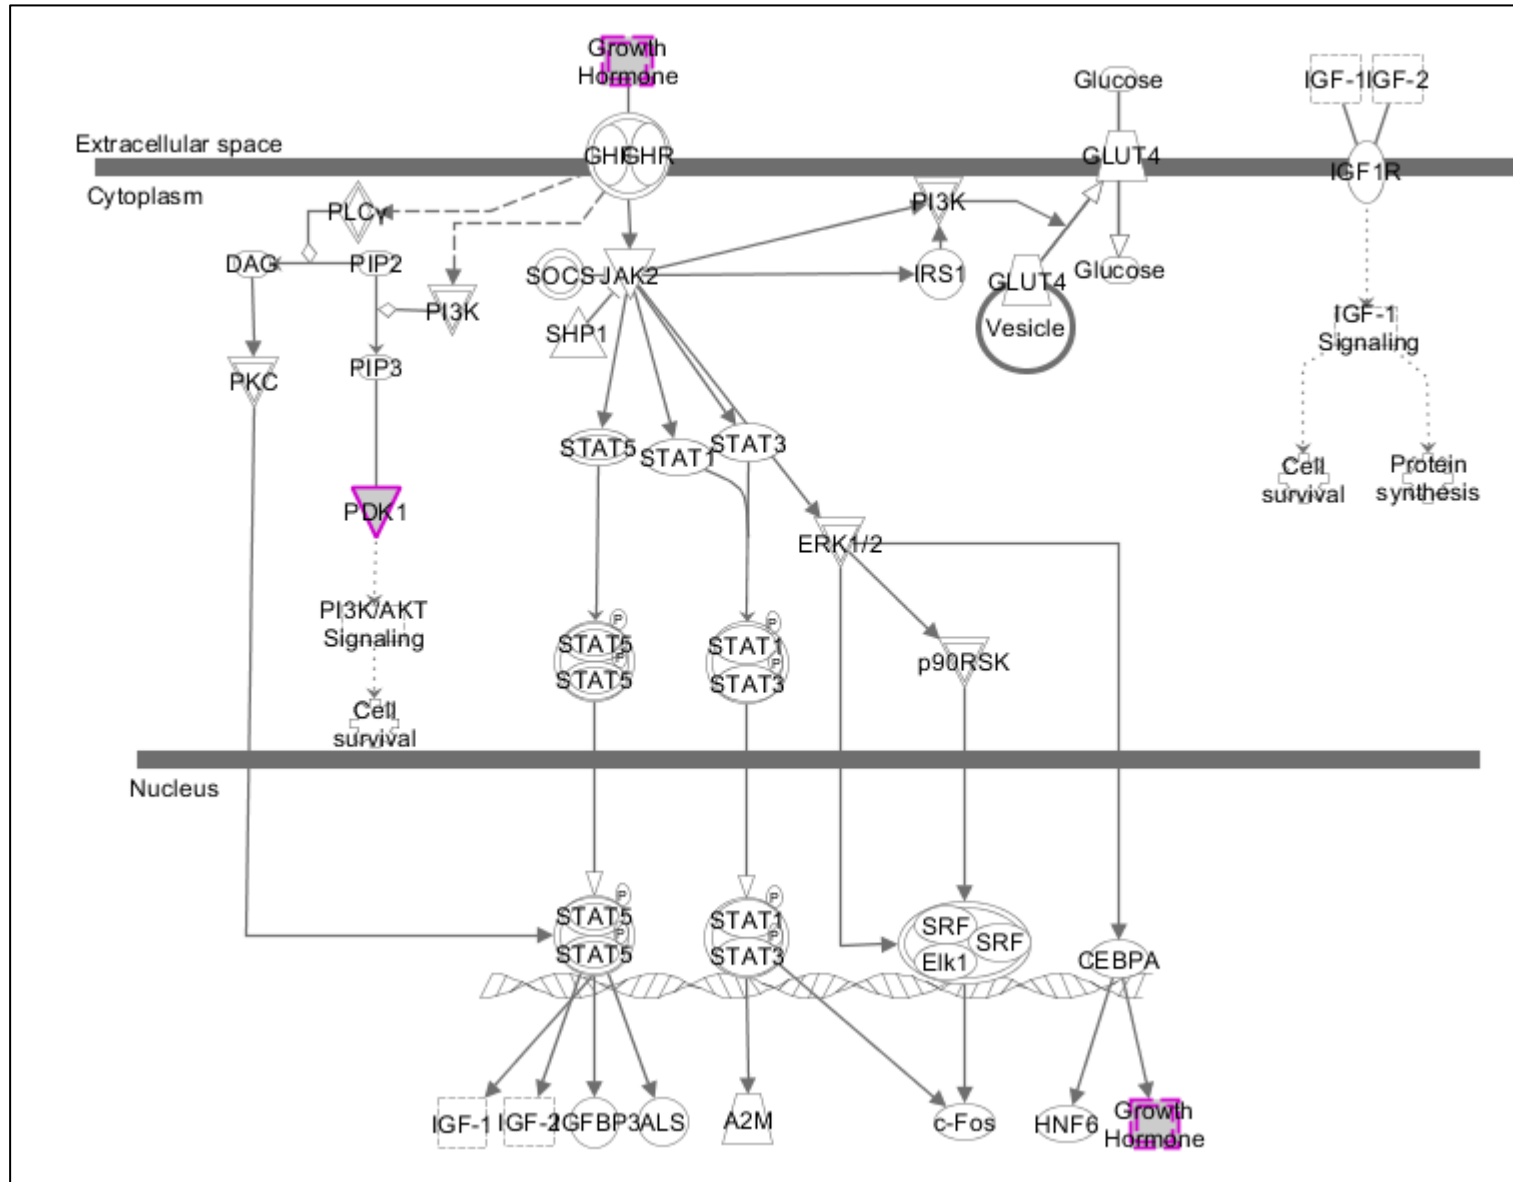

## 8-Leptin signaling in obesity

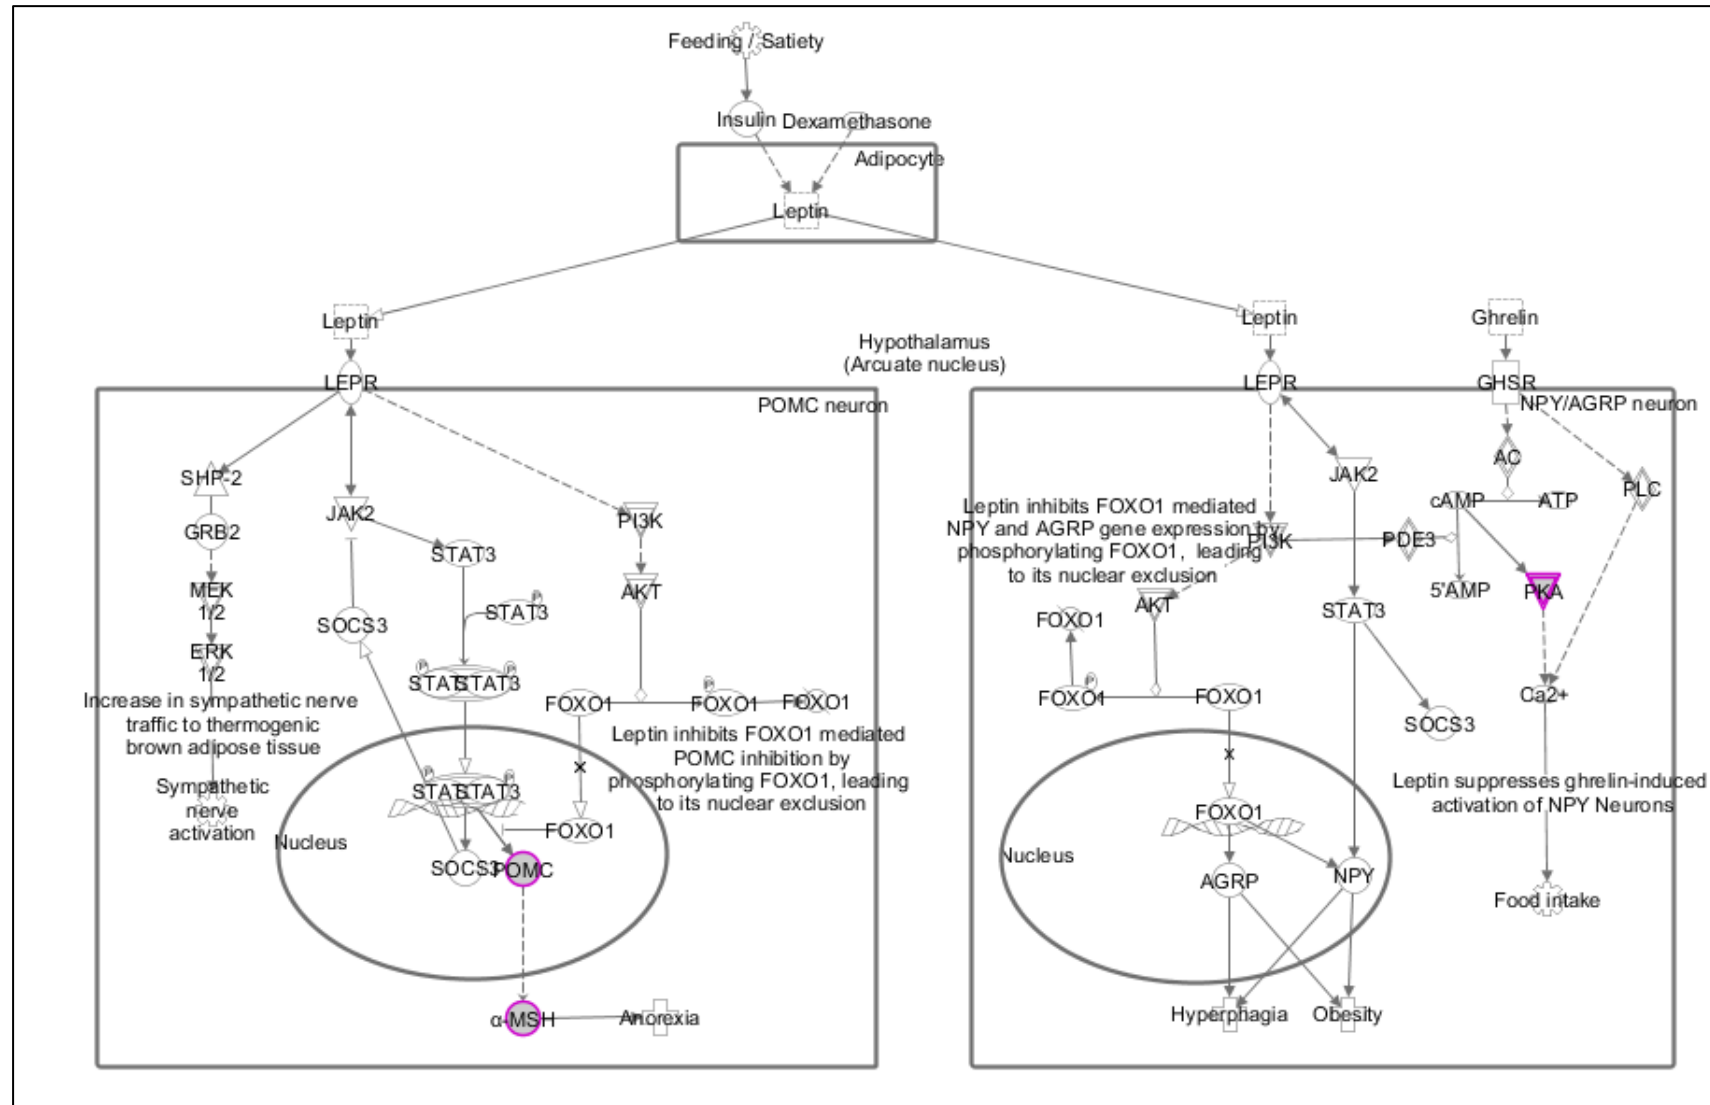

## 9-Glucocorticoid receptor signaling

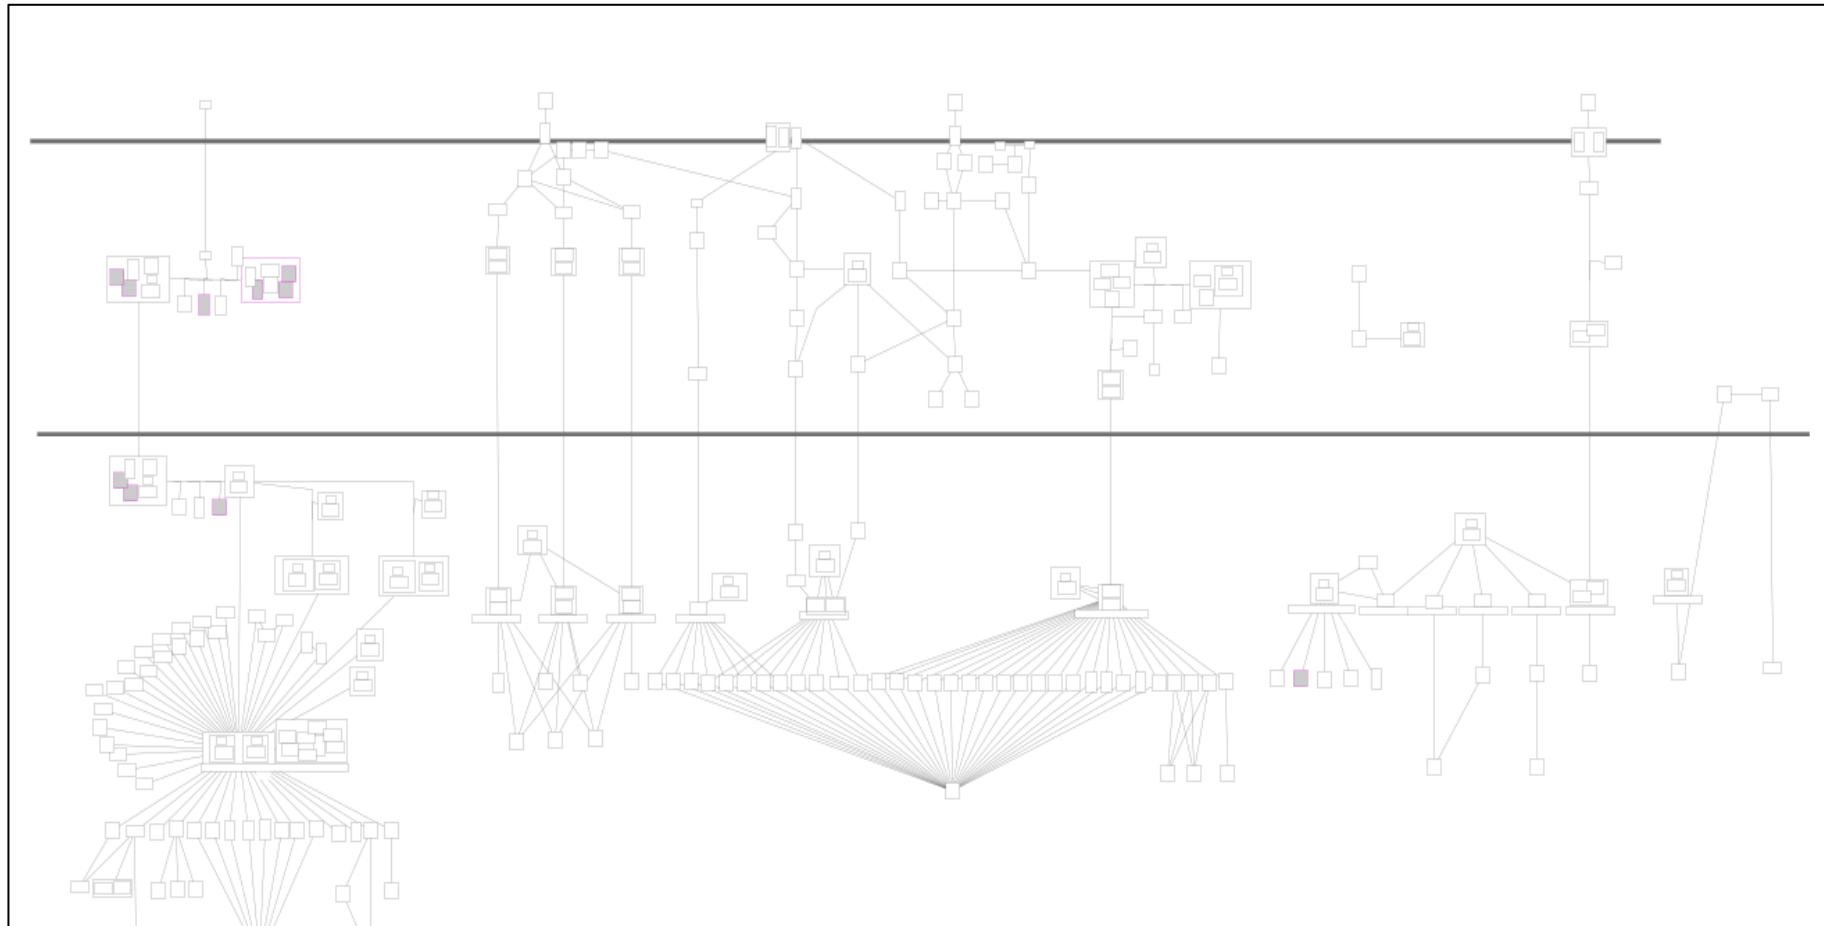

## 10-Melanocyte development and pigmentation signaling

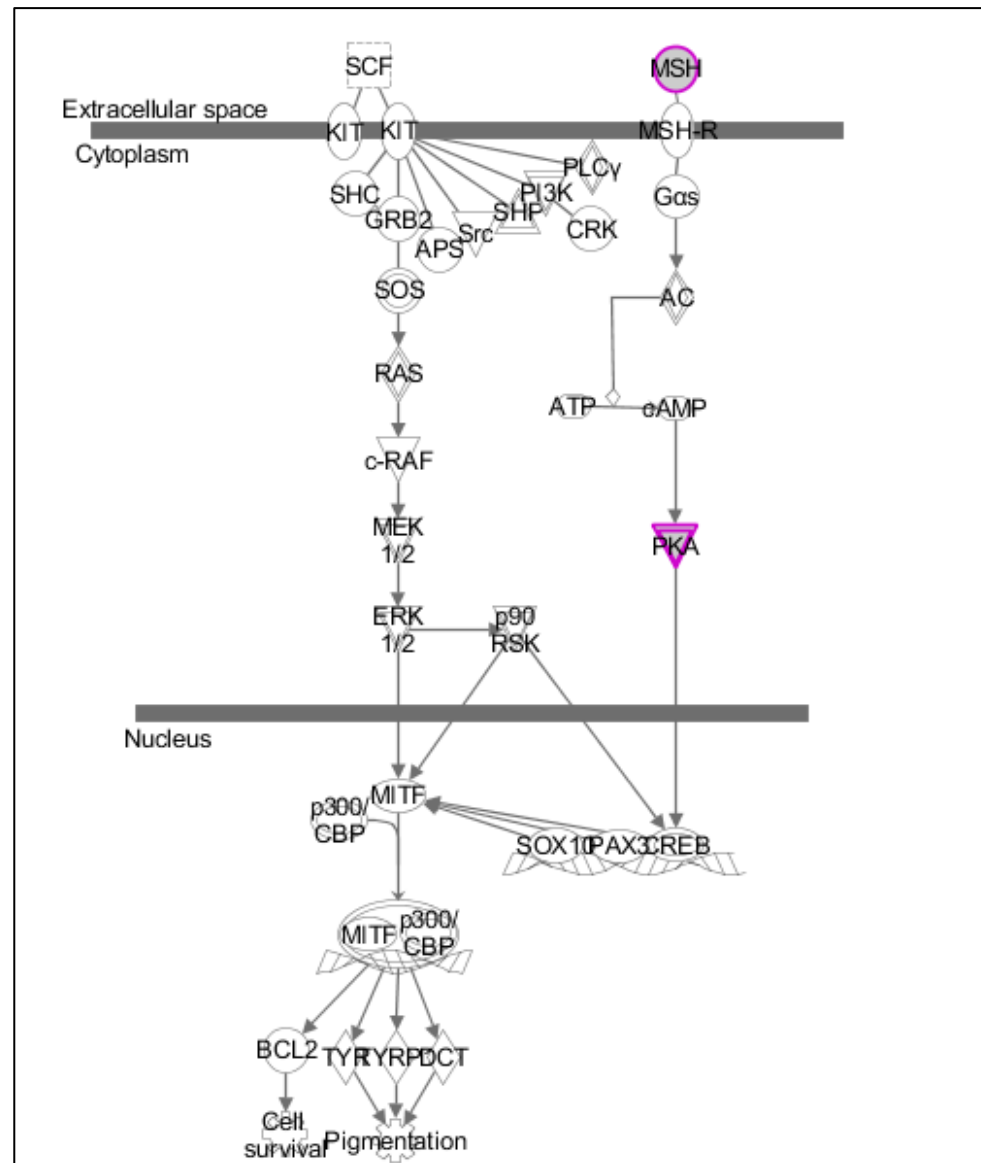

## 11-Prostate cancer signaling

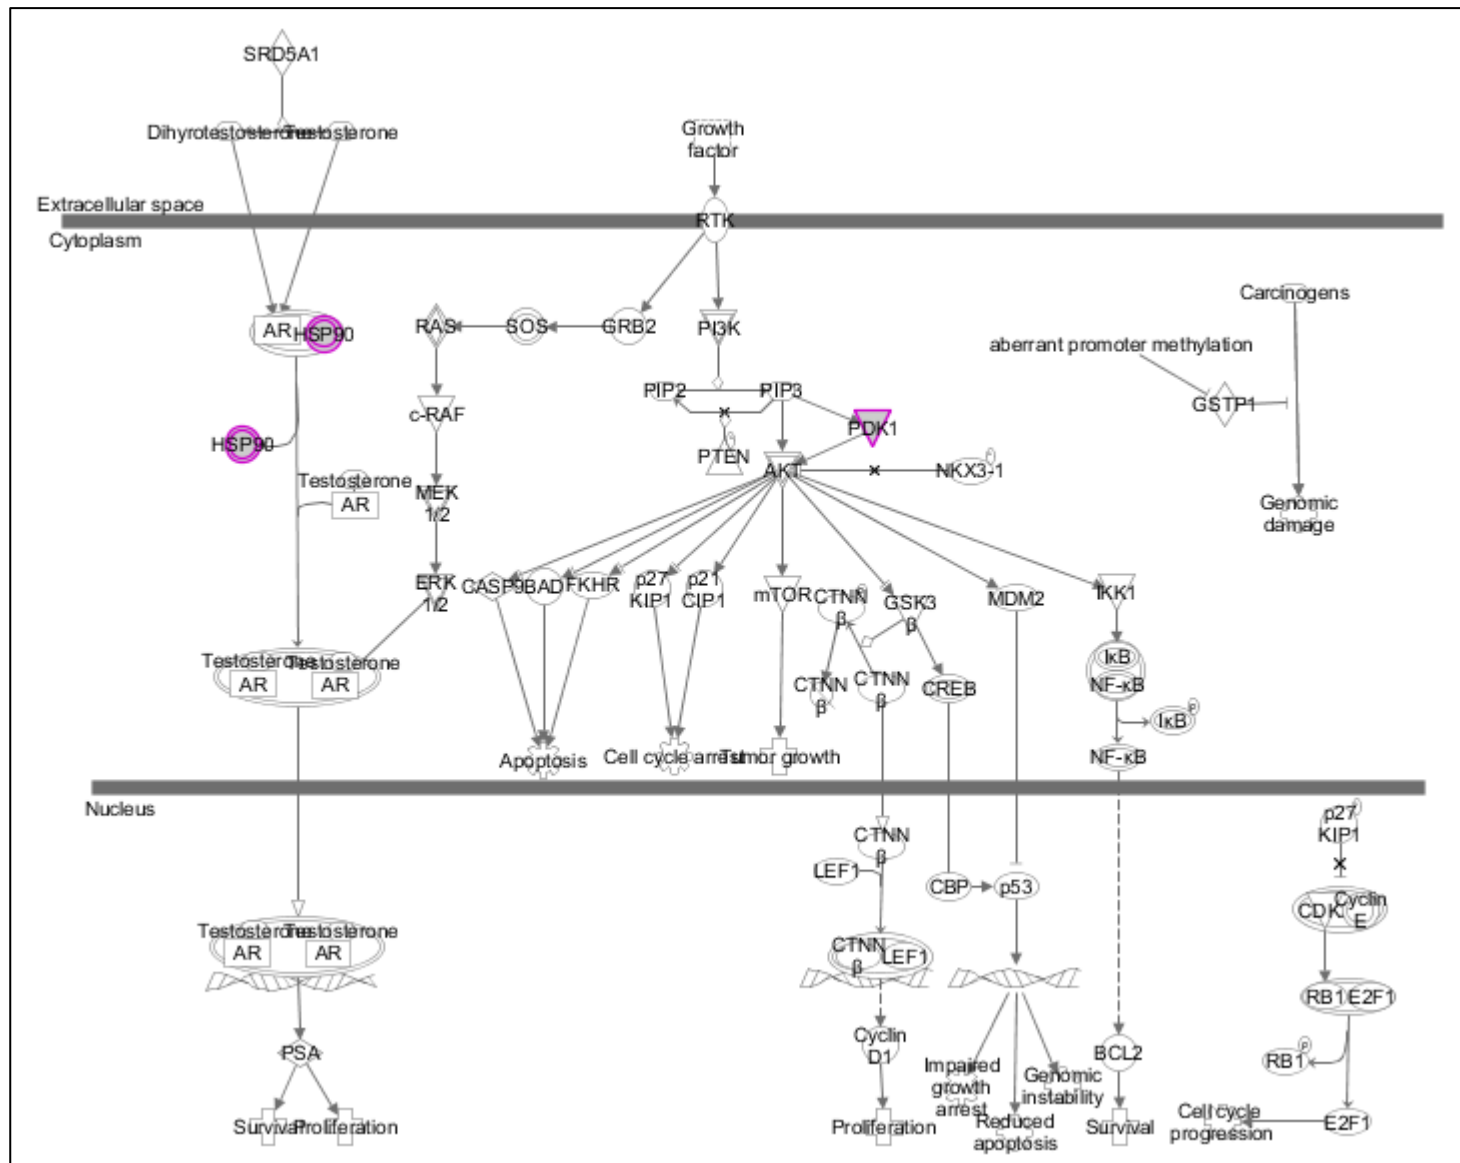

## 12-TR\_RXR activation

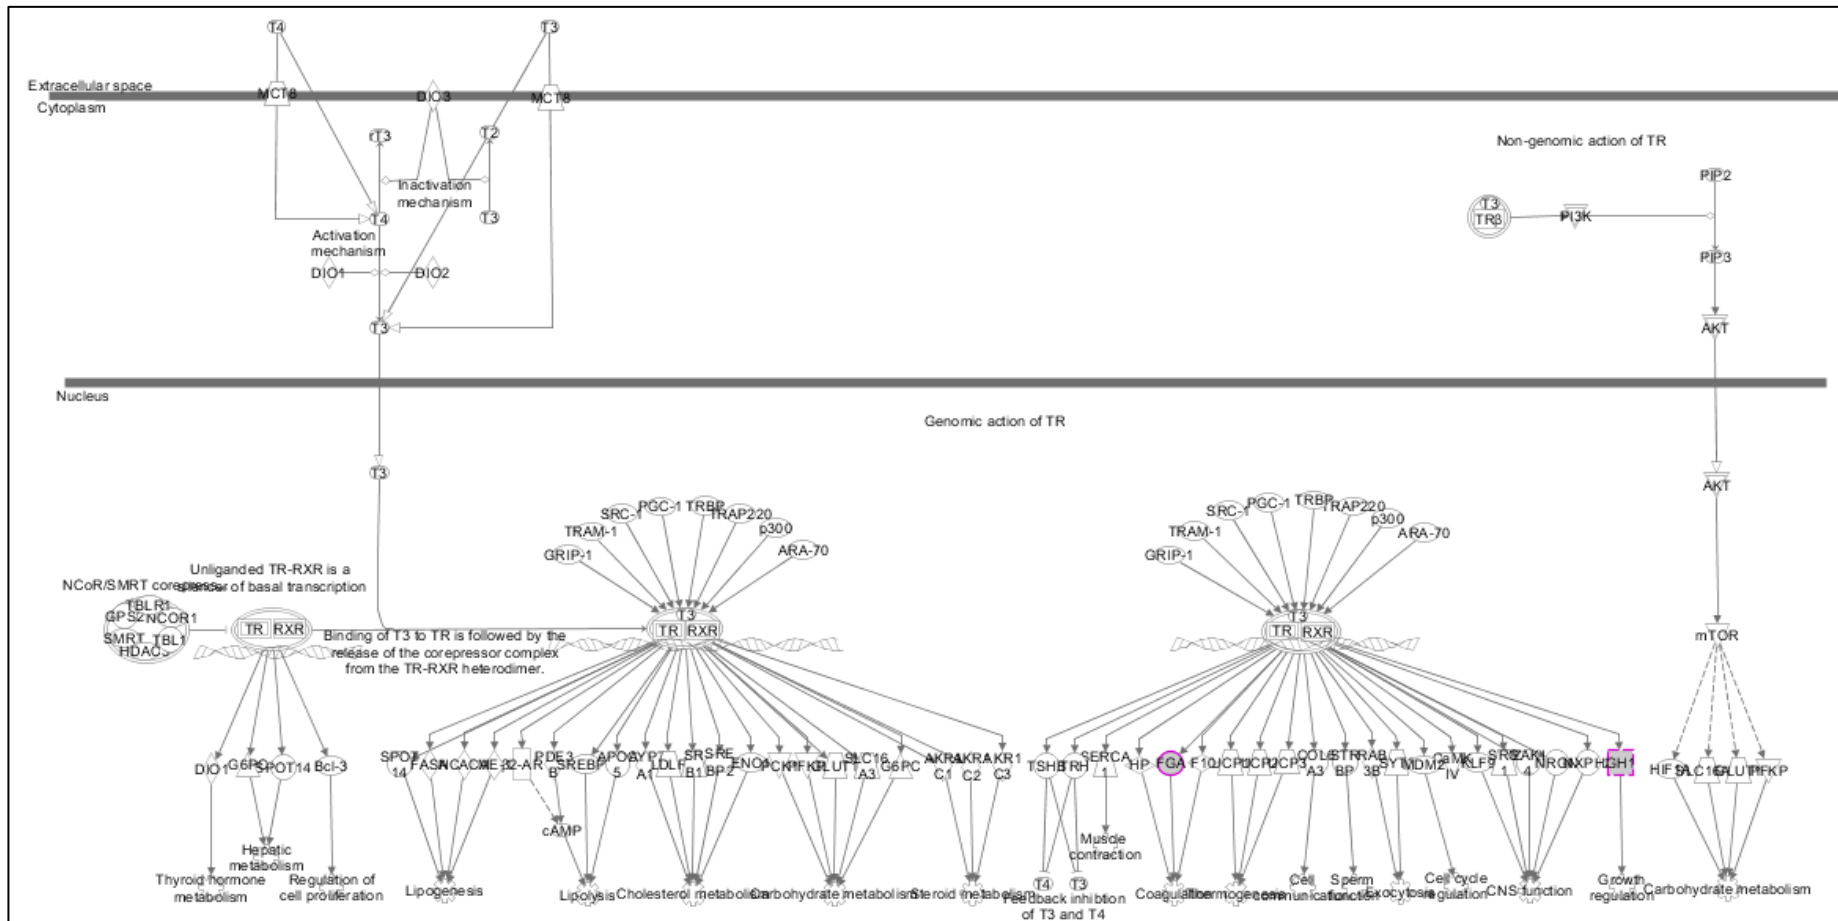

## 13-Neurigin signaling

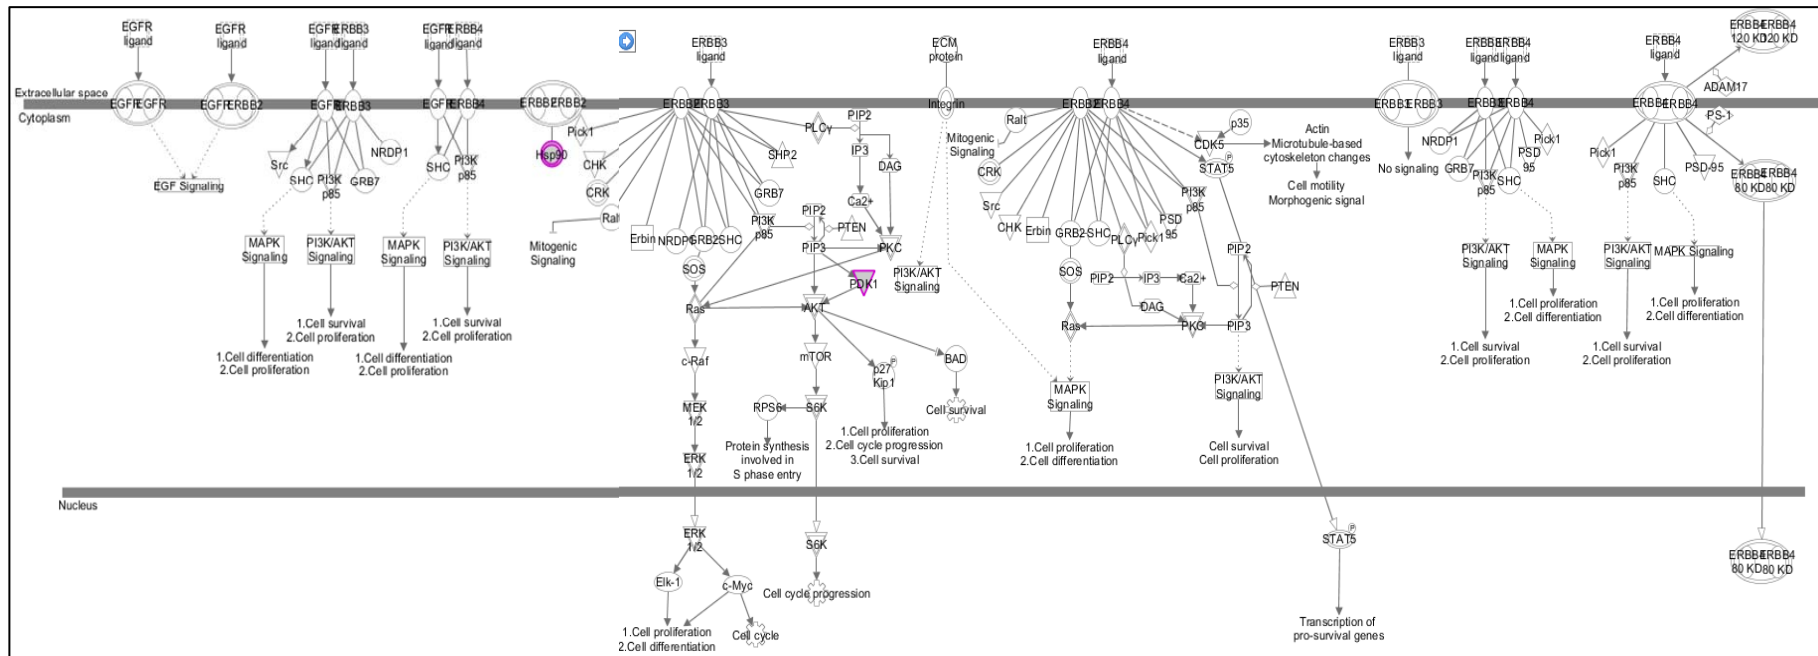

## 14-G beta gamma signaling

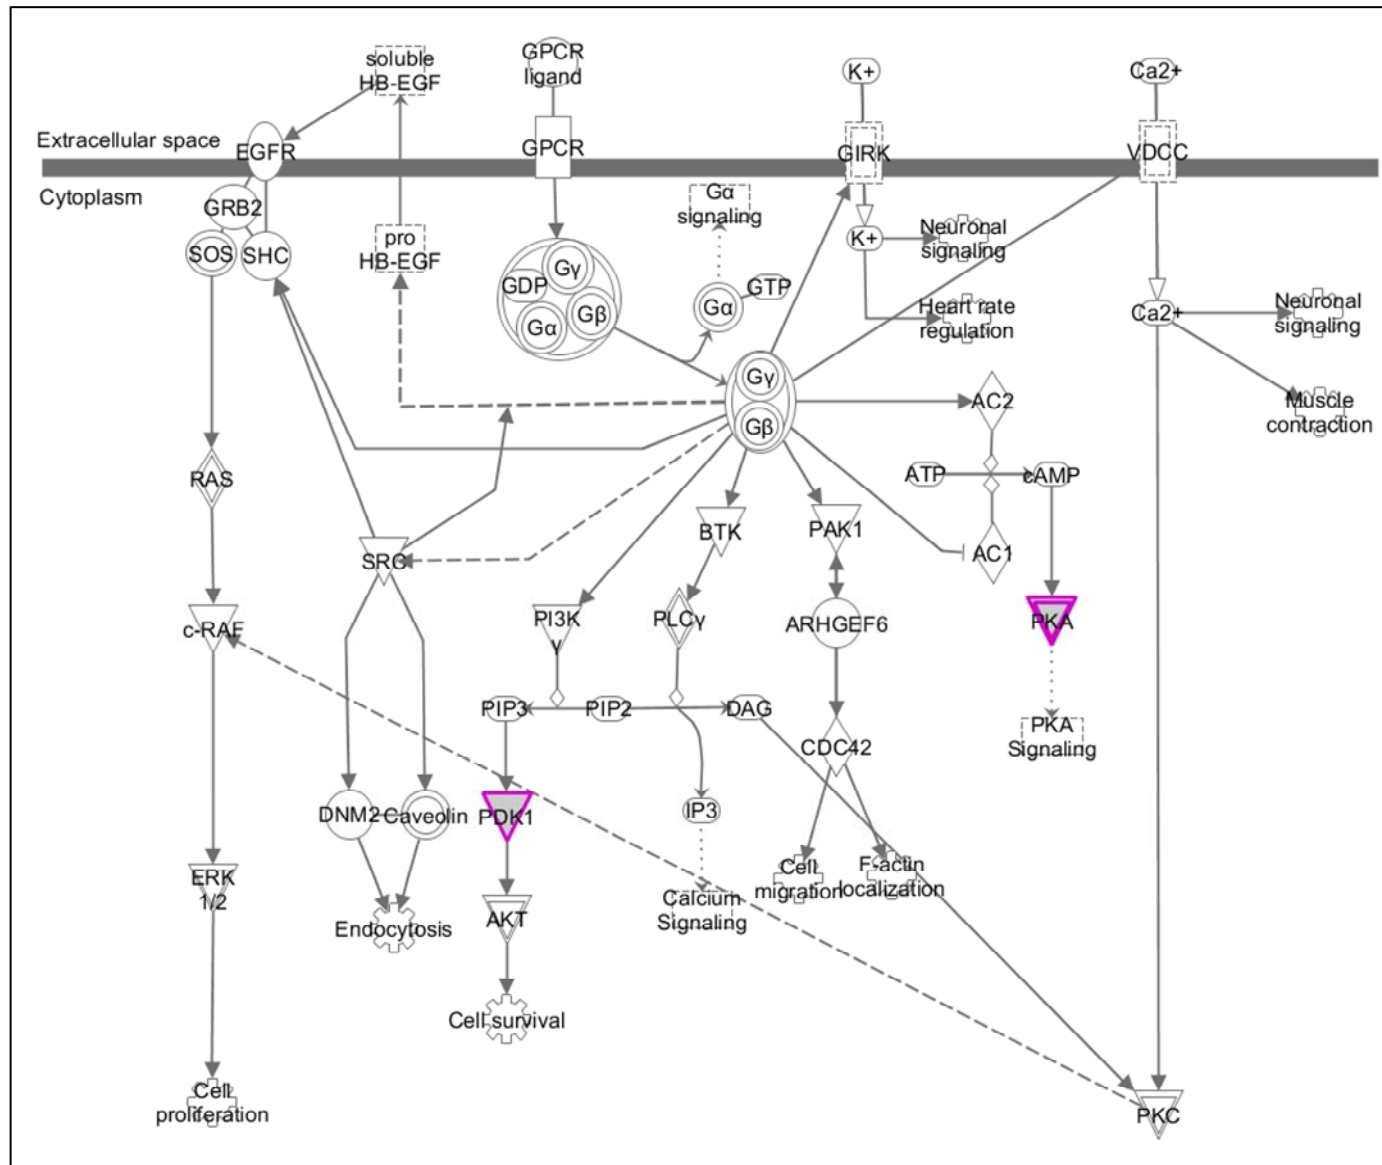

## 15-IGF-1 signaling

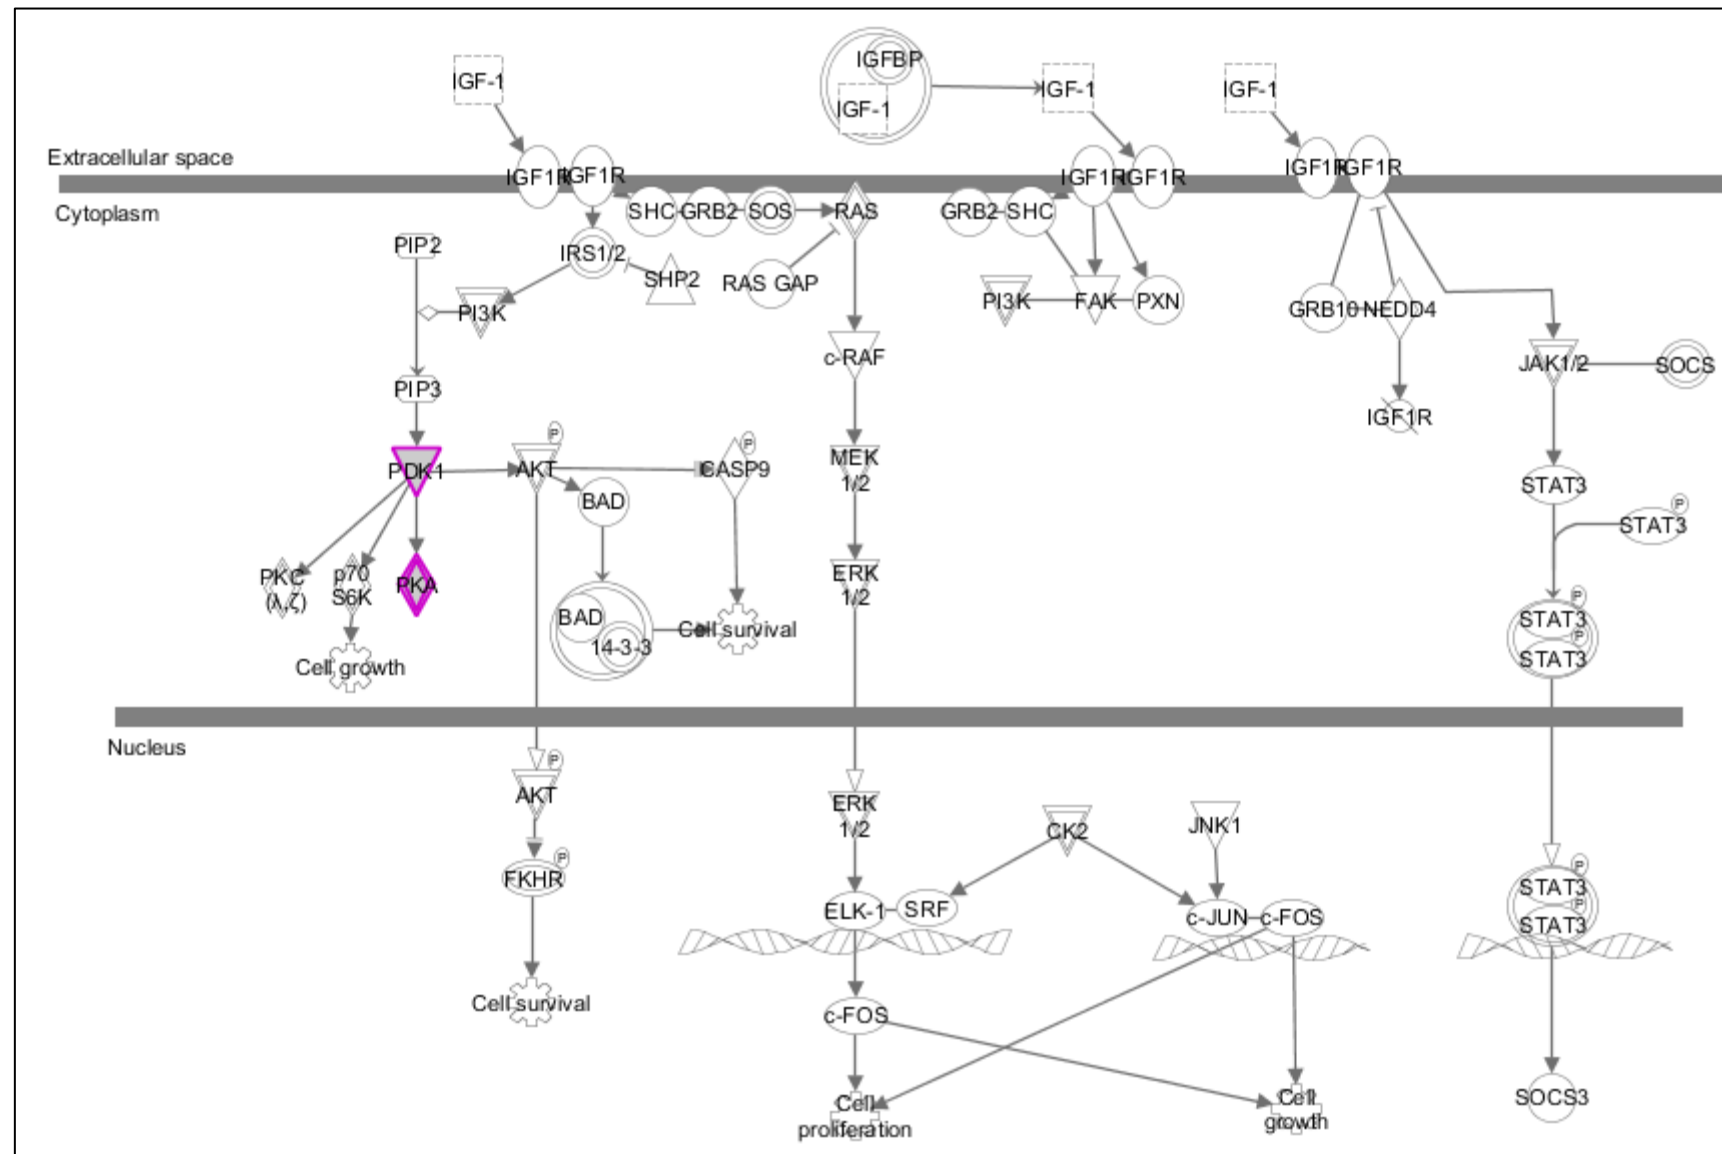

## 16-Nitric oxide signaling in cardiovascular system

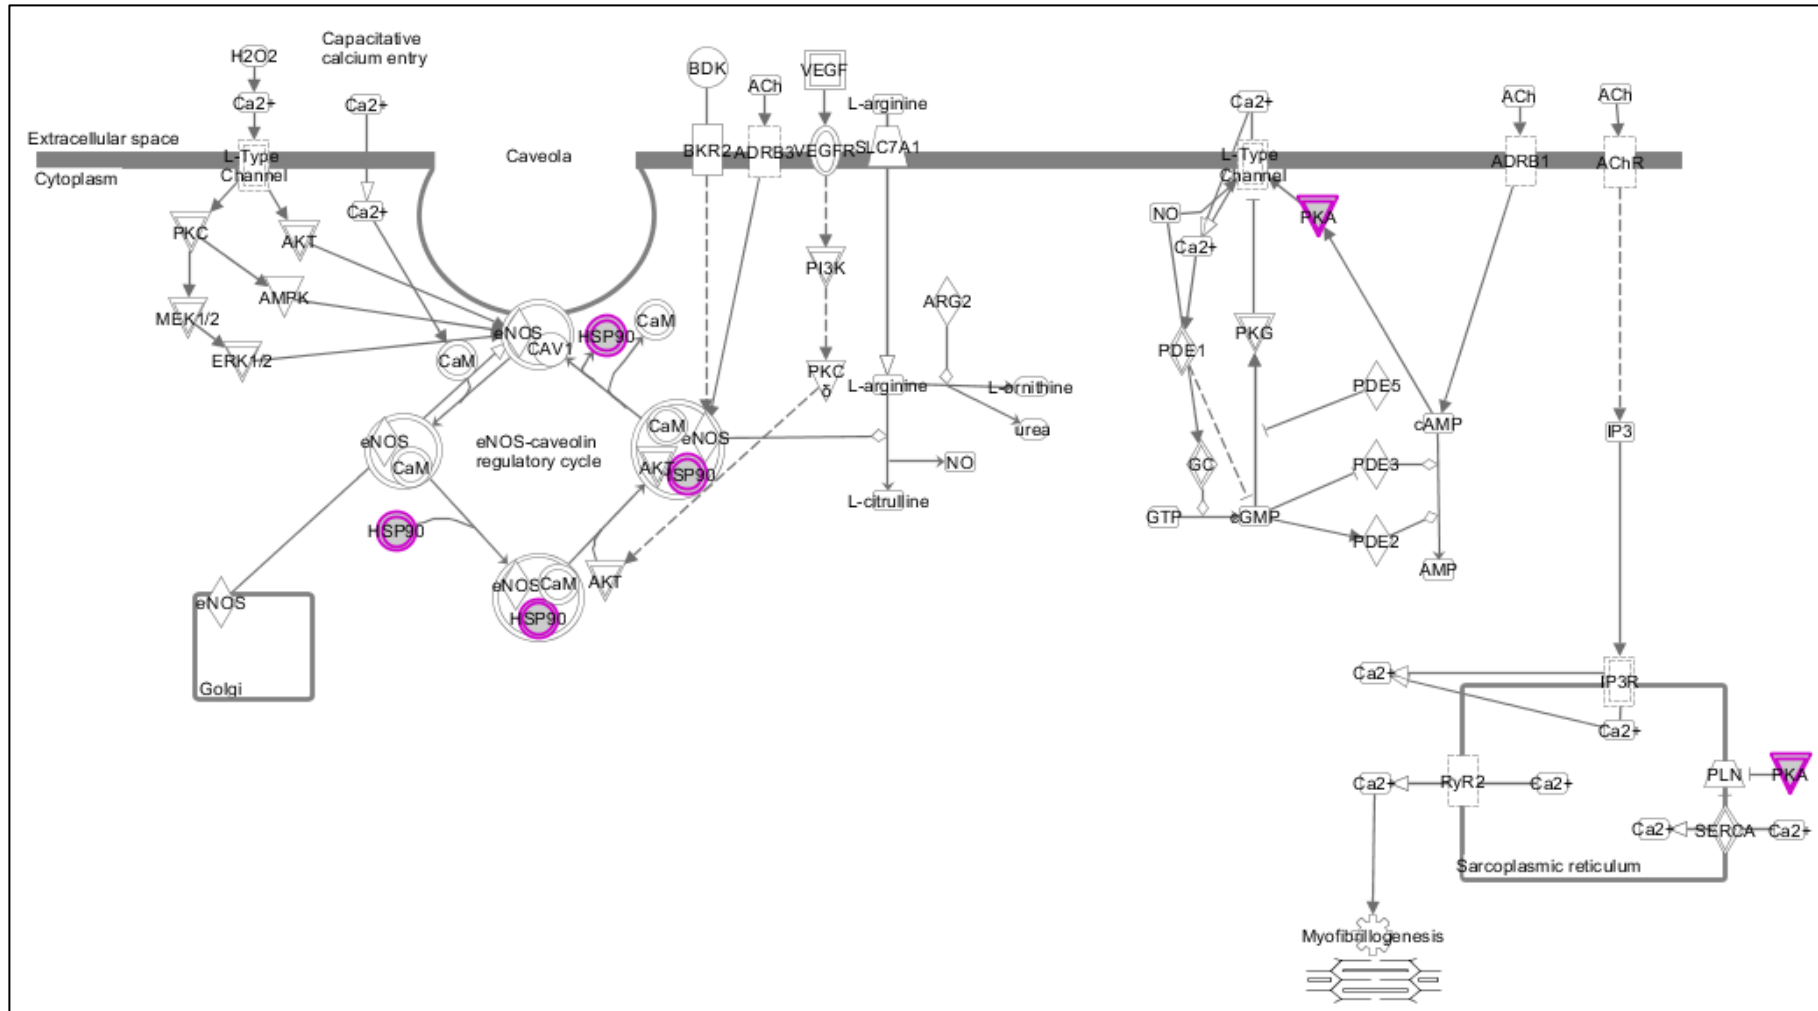

## 17-Androgen signaling

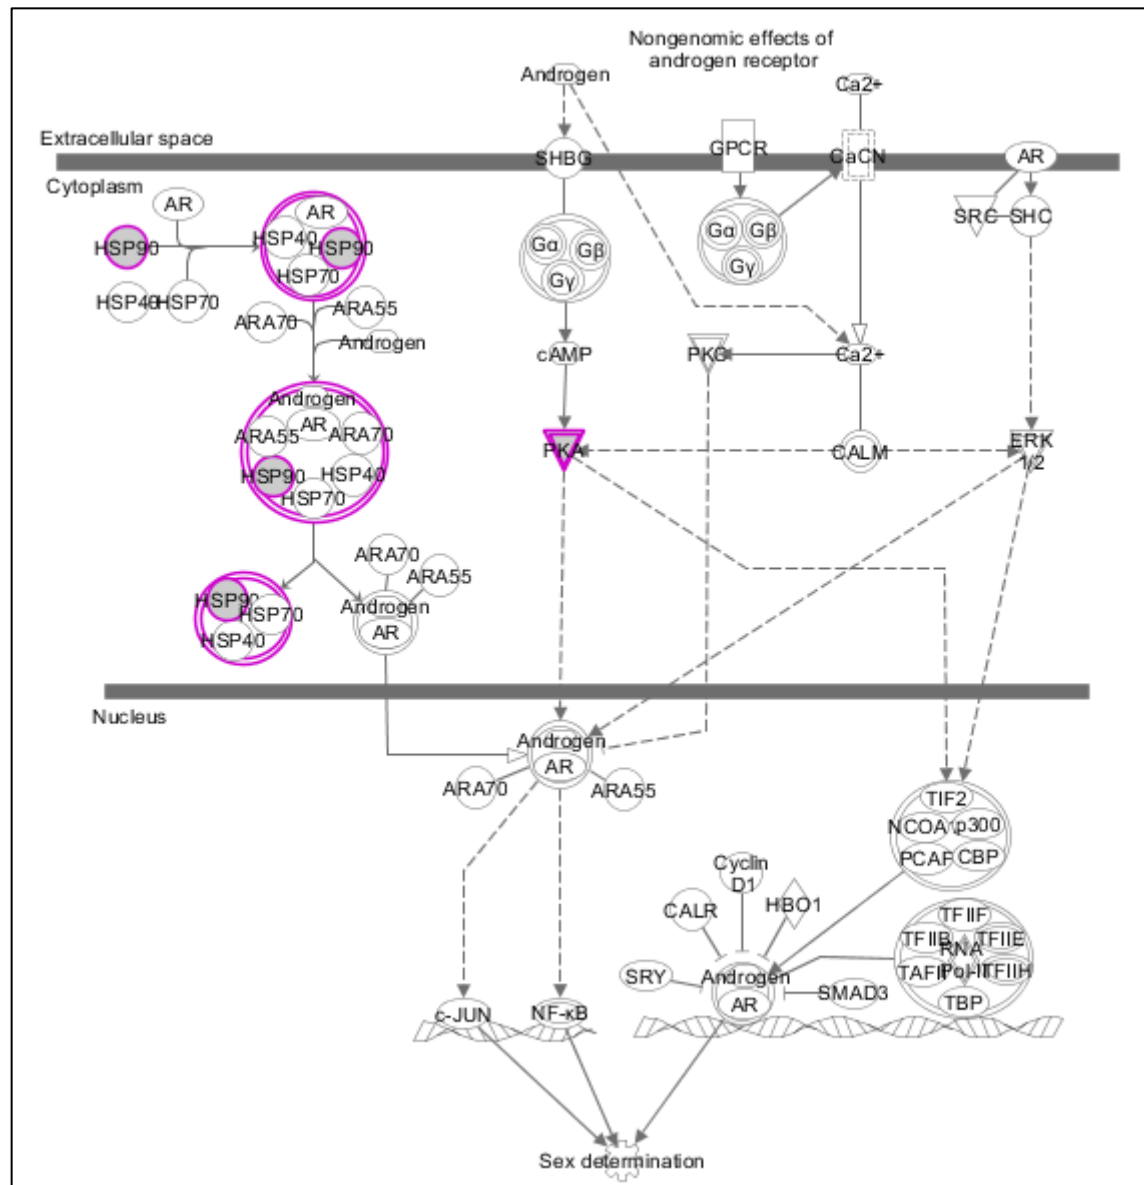

## 18-Corticotropin releasing hormone signaling

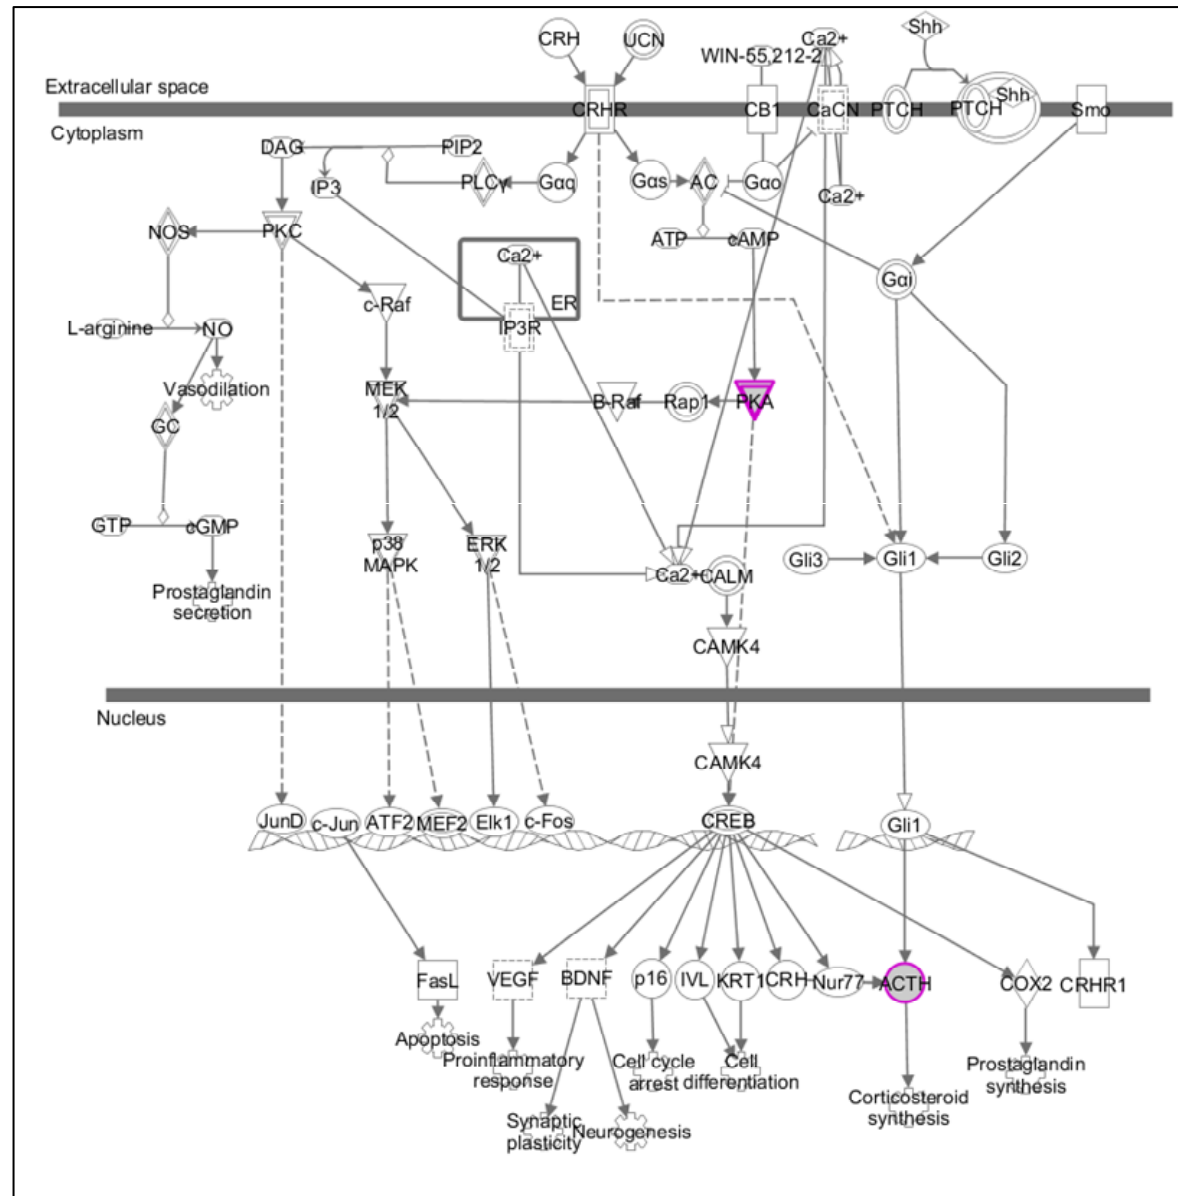

9 04:38 下午

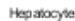

Macrophage

## 20-PI3K\_AKT signaling

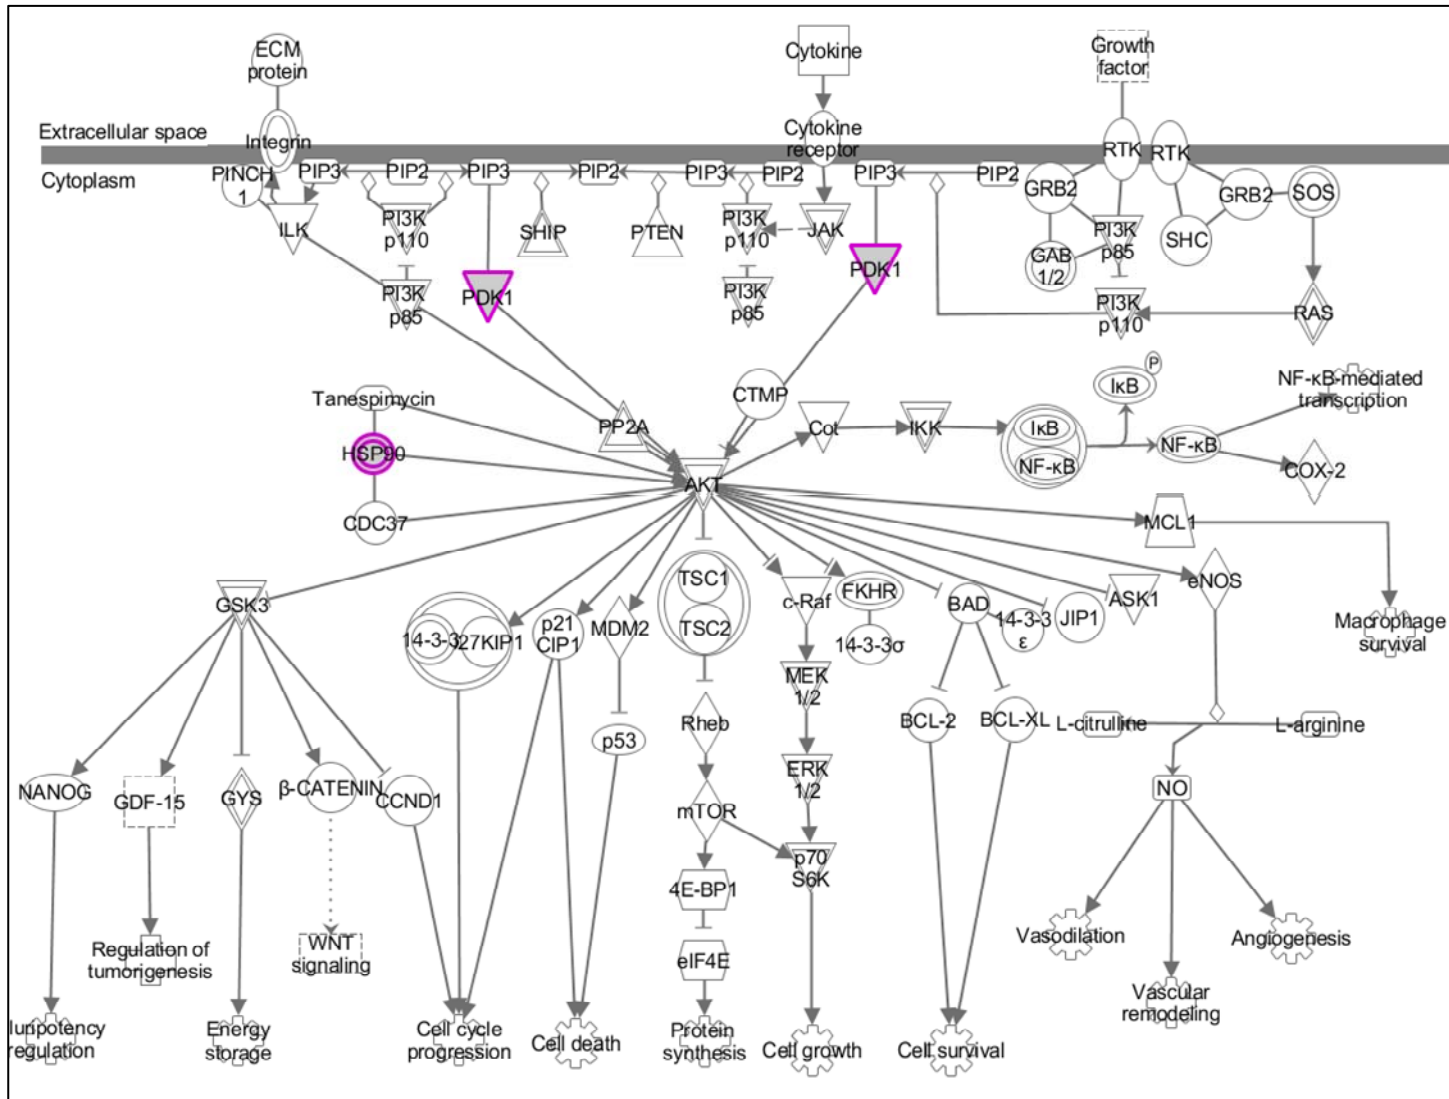

21-FXR\_RXR activation

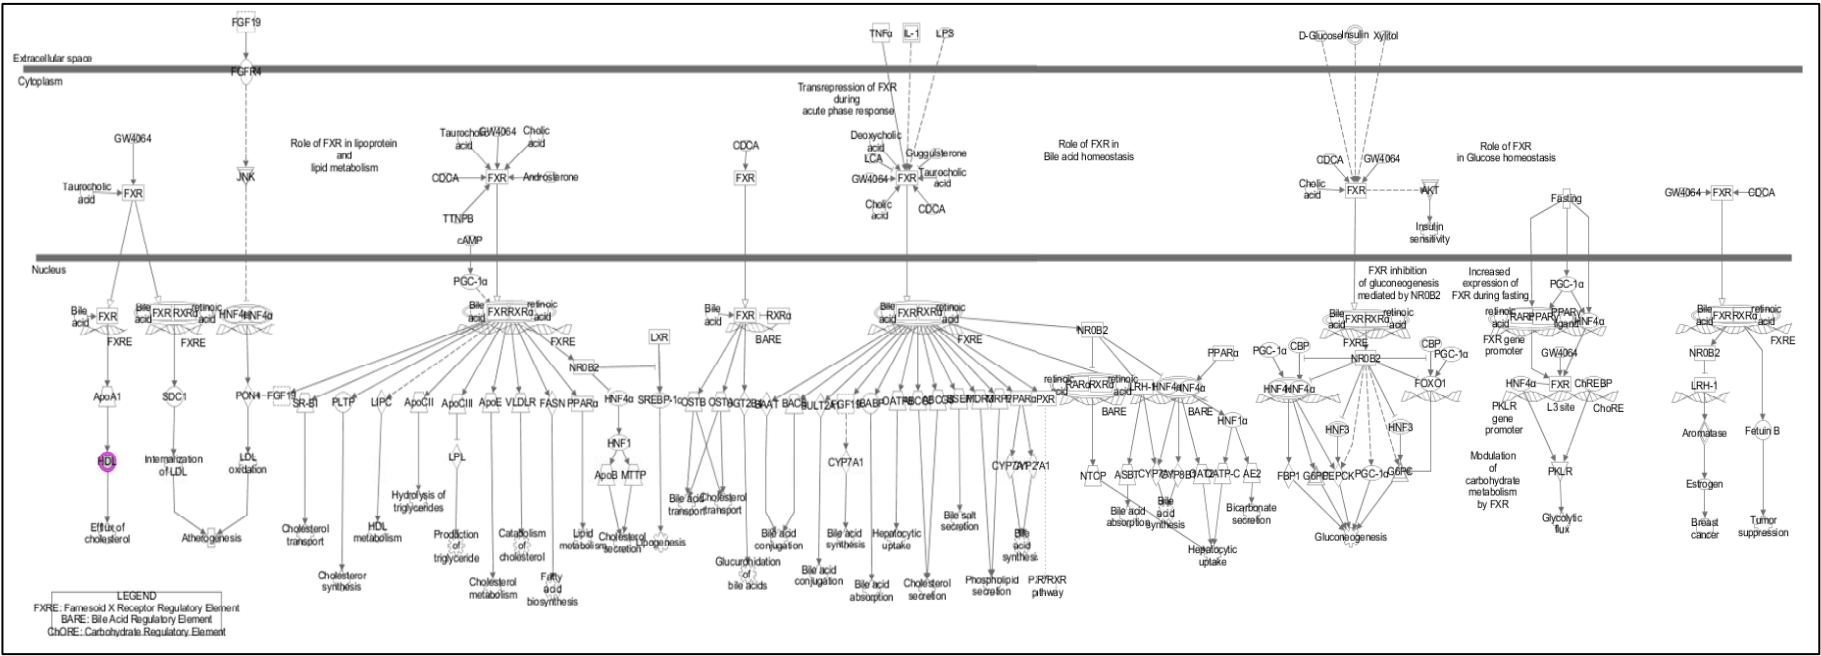

## 22-Insulin receptor signaling

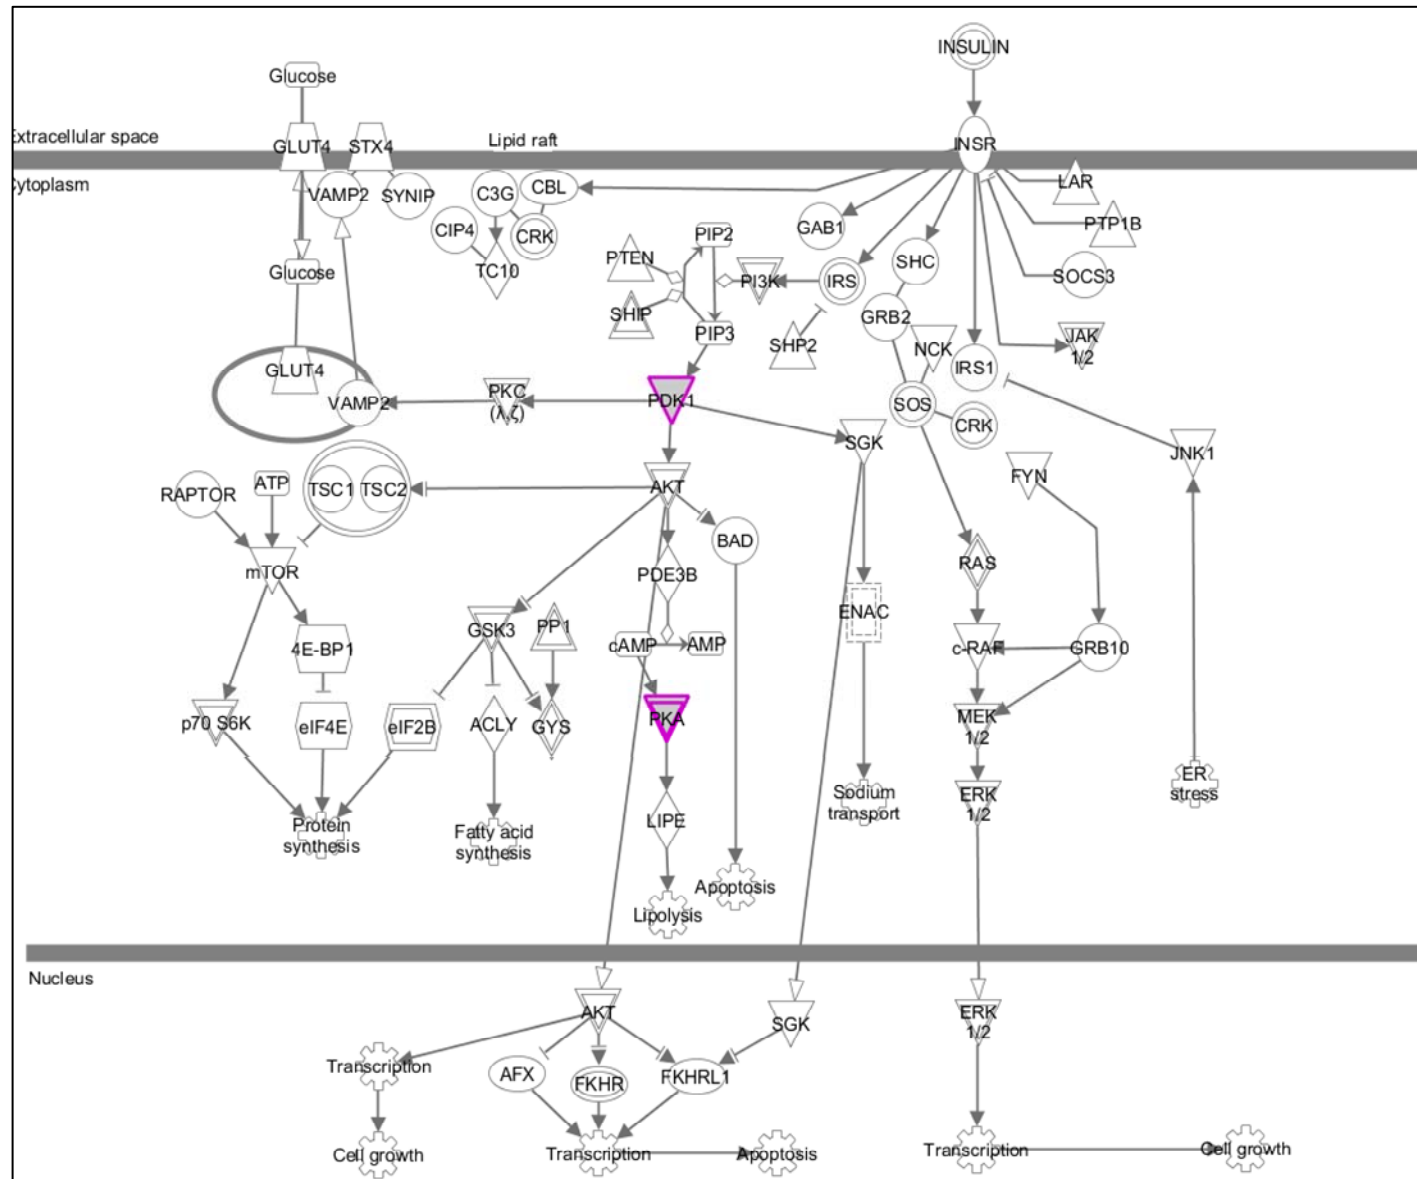

## 23-Aryl hydrocarbon receptor signaling

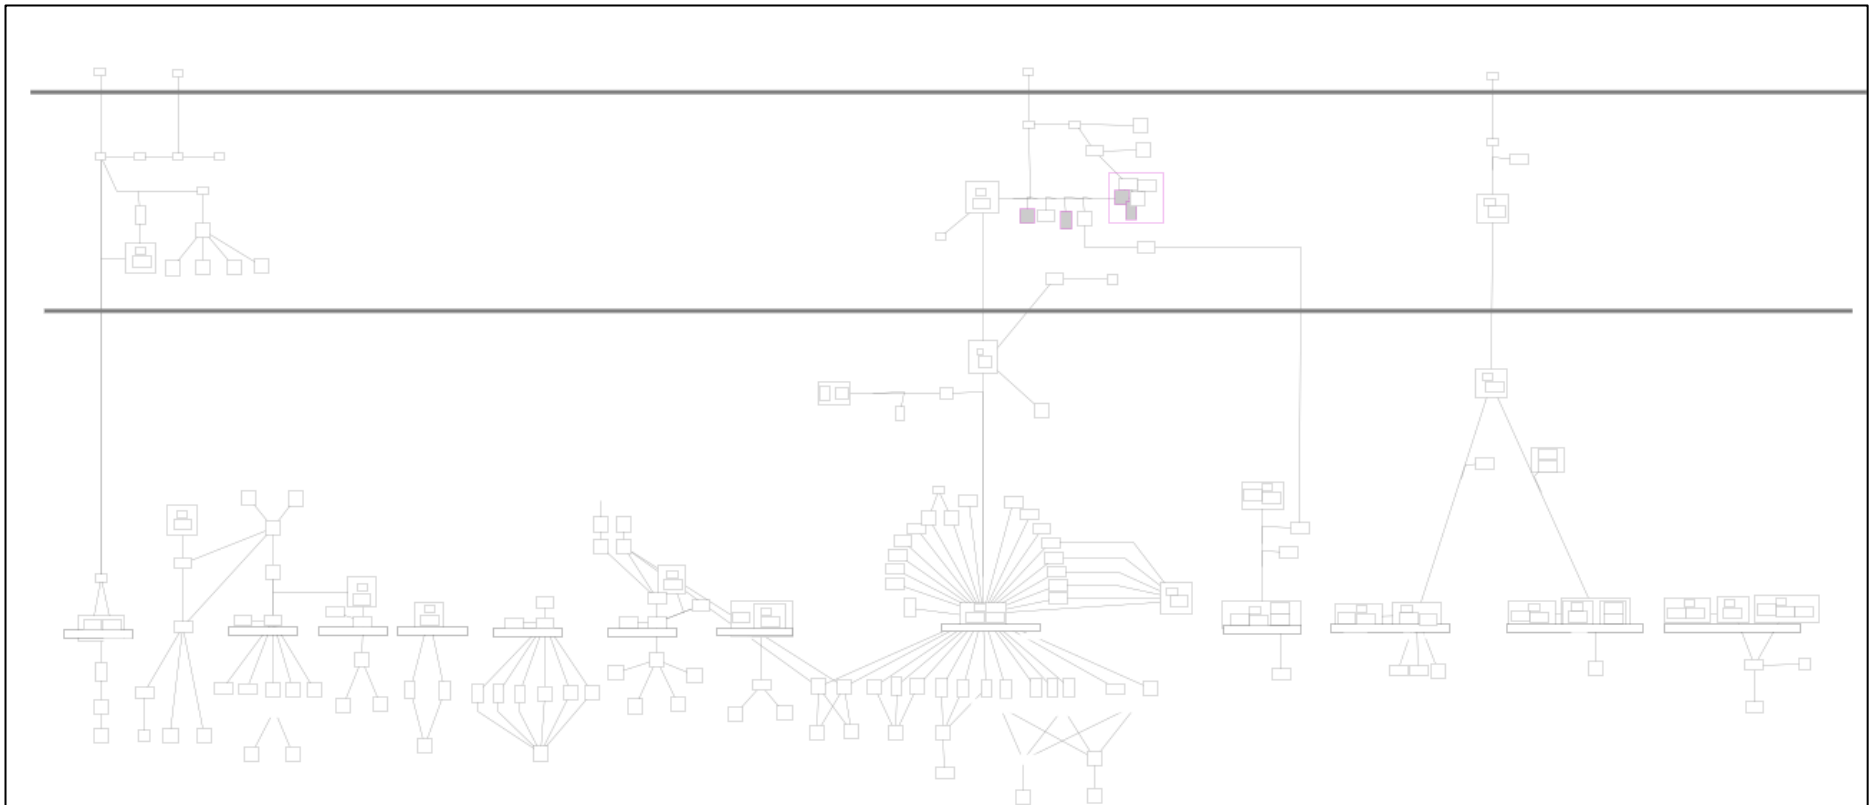

## 24-AMPK signaling

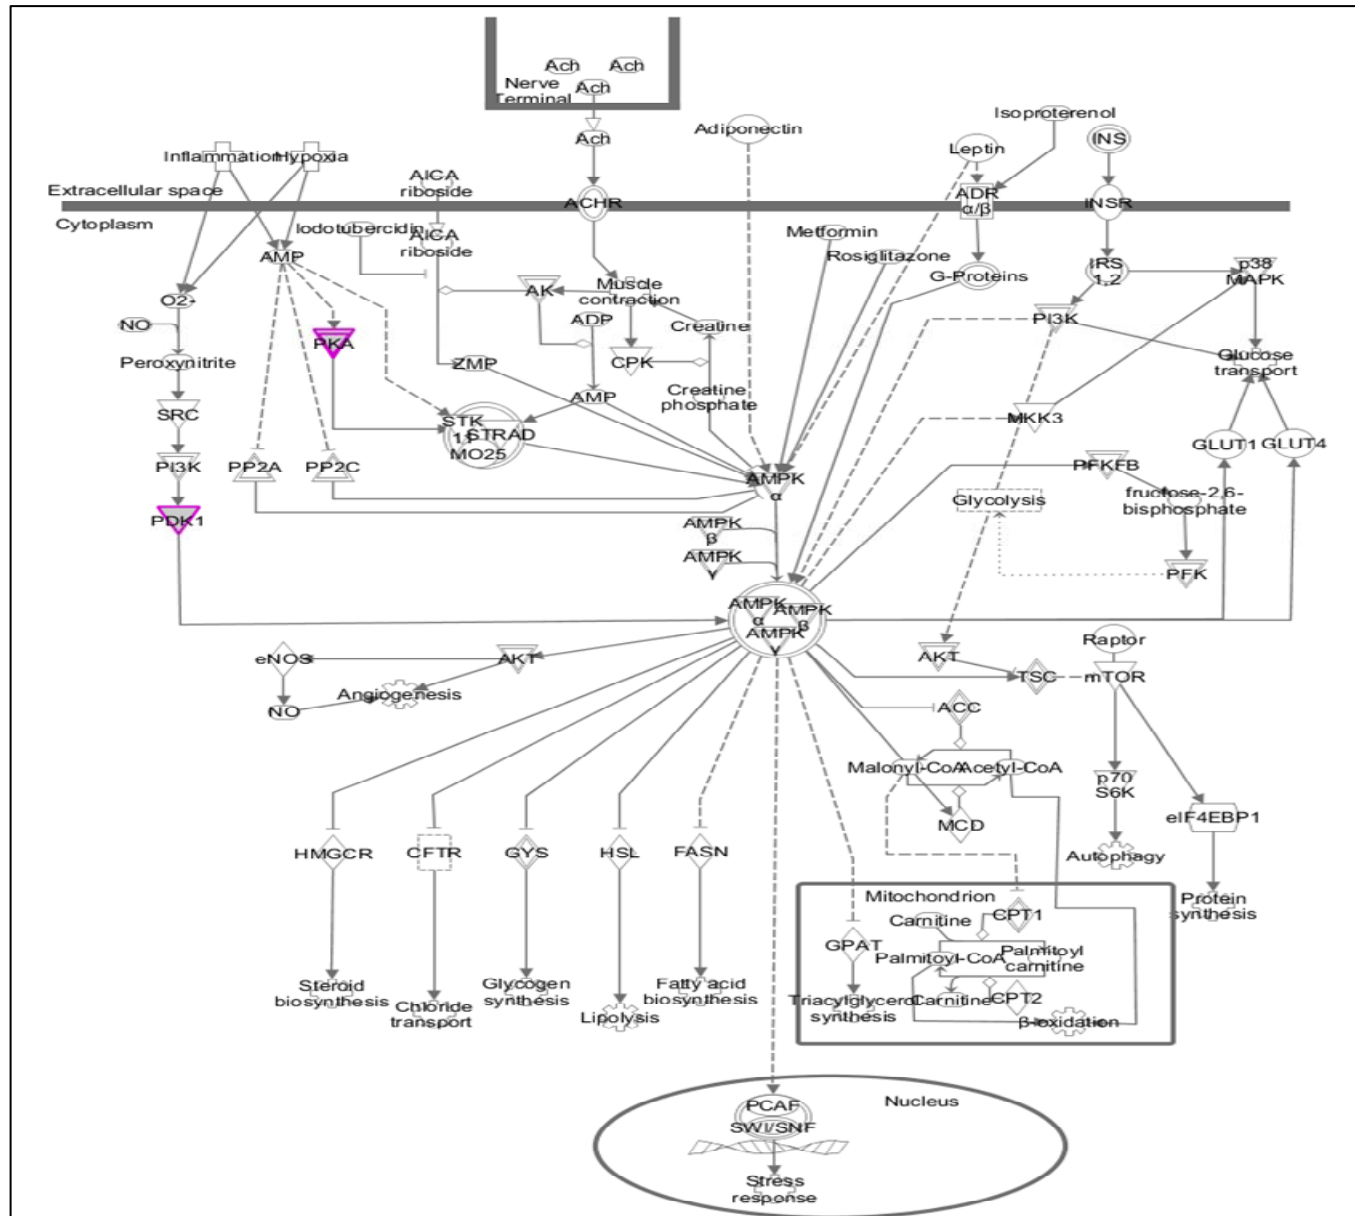

The diagram illustrates the mTOR signaling pathway and its role in translation regulation. It is divided into the Extracellular space and the Cytoplasm by a horizontal line.

**Extracellular space:** Stimuli include Stress, Heat Shock, Anisomycin; Cytokines, Growth factors, Hormones; and ECM protein.

**Cytoplasm:**

- Stress, Heat Shock, Anisomycin:** Activates p38 MAPK, which leads to MNK1. MNK1 phosphorylates eIF4E, leading to the formation of eIF4EBP and eIF4E. This complex leads to Translation OFF.
- Cytokines, Growth factors, Hormones:** Bind to a Receptor, which activates IRS1. IRS1 activates PI3K, which leads to PIP3 and then PIP2. PIP2 activates PDK1, which phosphorylates PKC and AKT. AKT inhibits mTOR.
- ECM protein:** Binds to Integrin, which activates SHC, GRB2, SOS, Ras, c-Raf, MEK 1/2, and ERK 1/2. ERK 1/2 phosphorylates S6K.
- mTOR Pathway:** mTOR (rapamycin-mTOR) is inhibited by Rapamycin. S6K is activated by mTOR and phosphorylates S6.
- Translation ON:** The mTOR pathway leads to the formation of the eIF4F complex (eIF4E, eIF4A, eIF4B) and the eIF4G complex (eIF4G, eIF4A, eIF4B). These complexes, along with PABP and PAIP1, lead to the formation of the 48S ribosomal subunit (40S, eIF2, eIF3, eIF1A, eIF1B, mRNA). This complex leads to Translation ON.

## 26-Germ cell-sertoli cell junction signaling

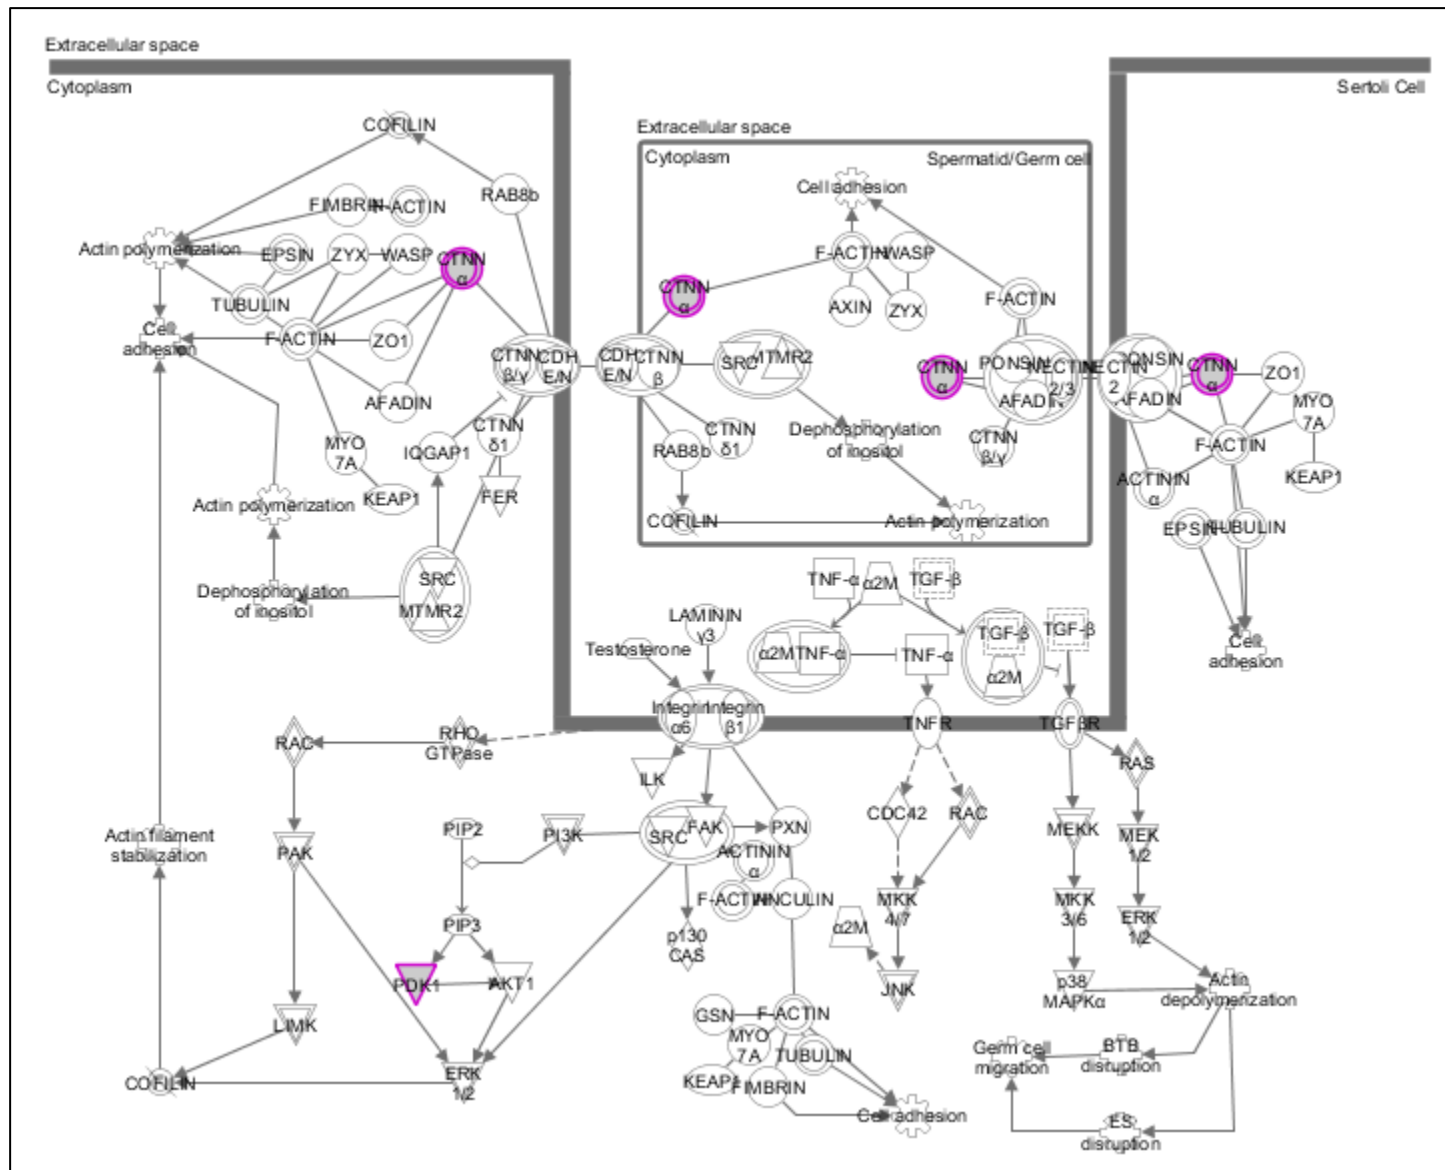

## 27-Prostanoid biosynthesis

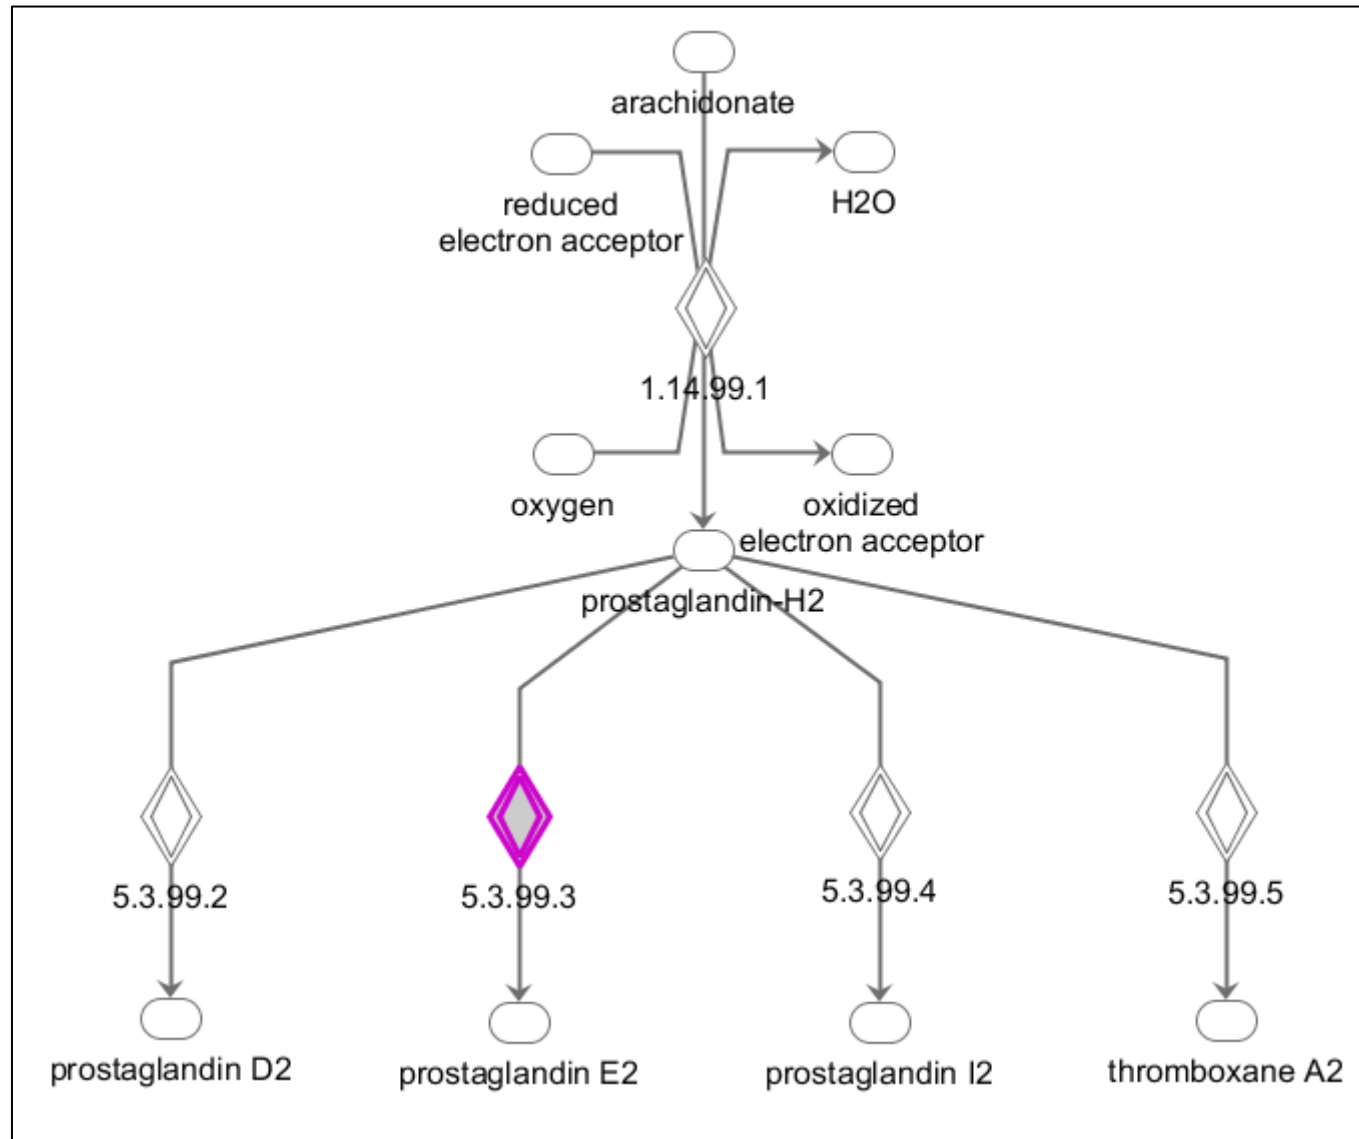

## 28-Tight junction signaling

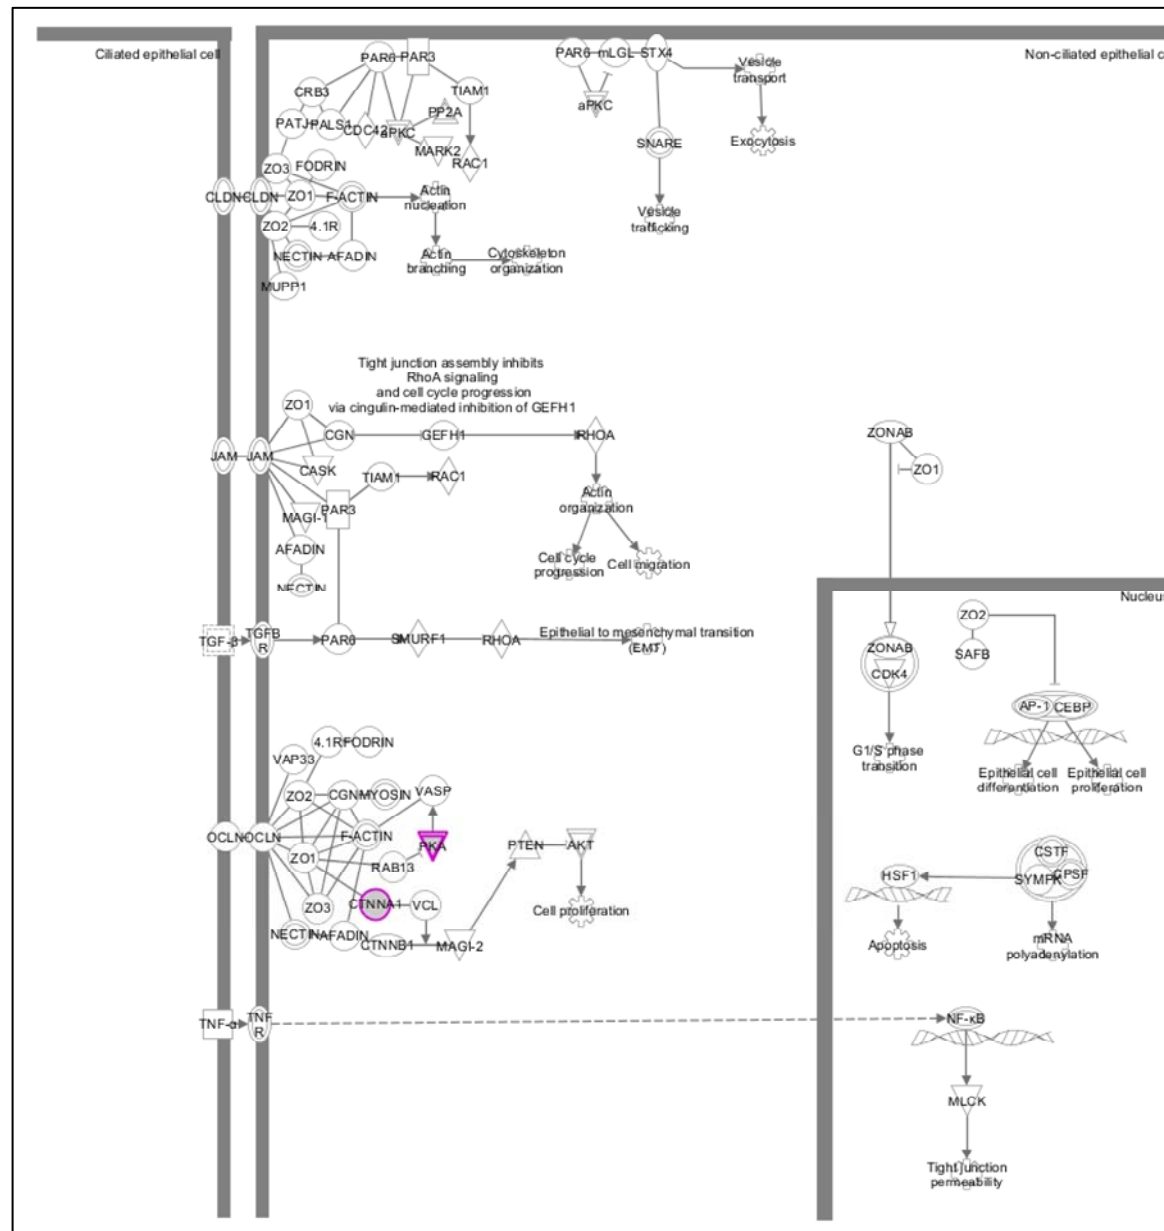

## 29-Acute phase response signaling

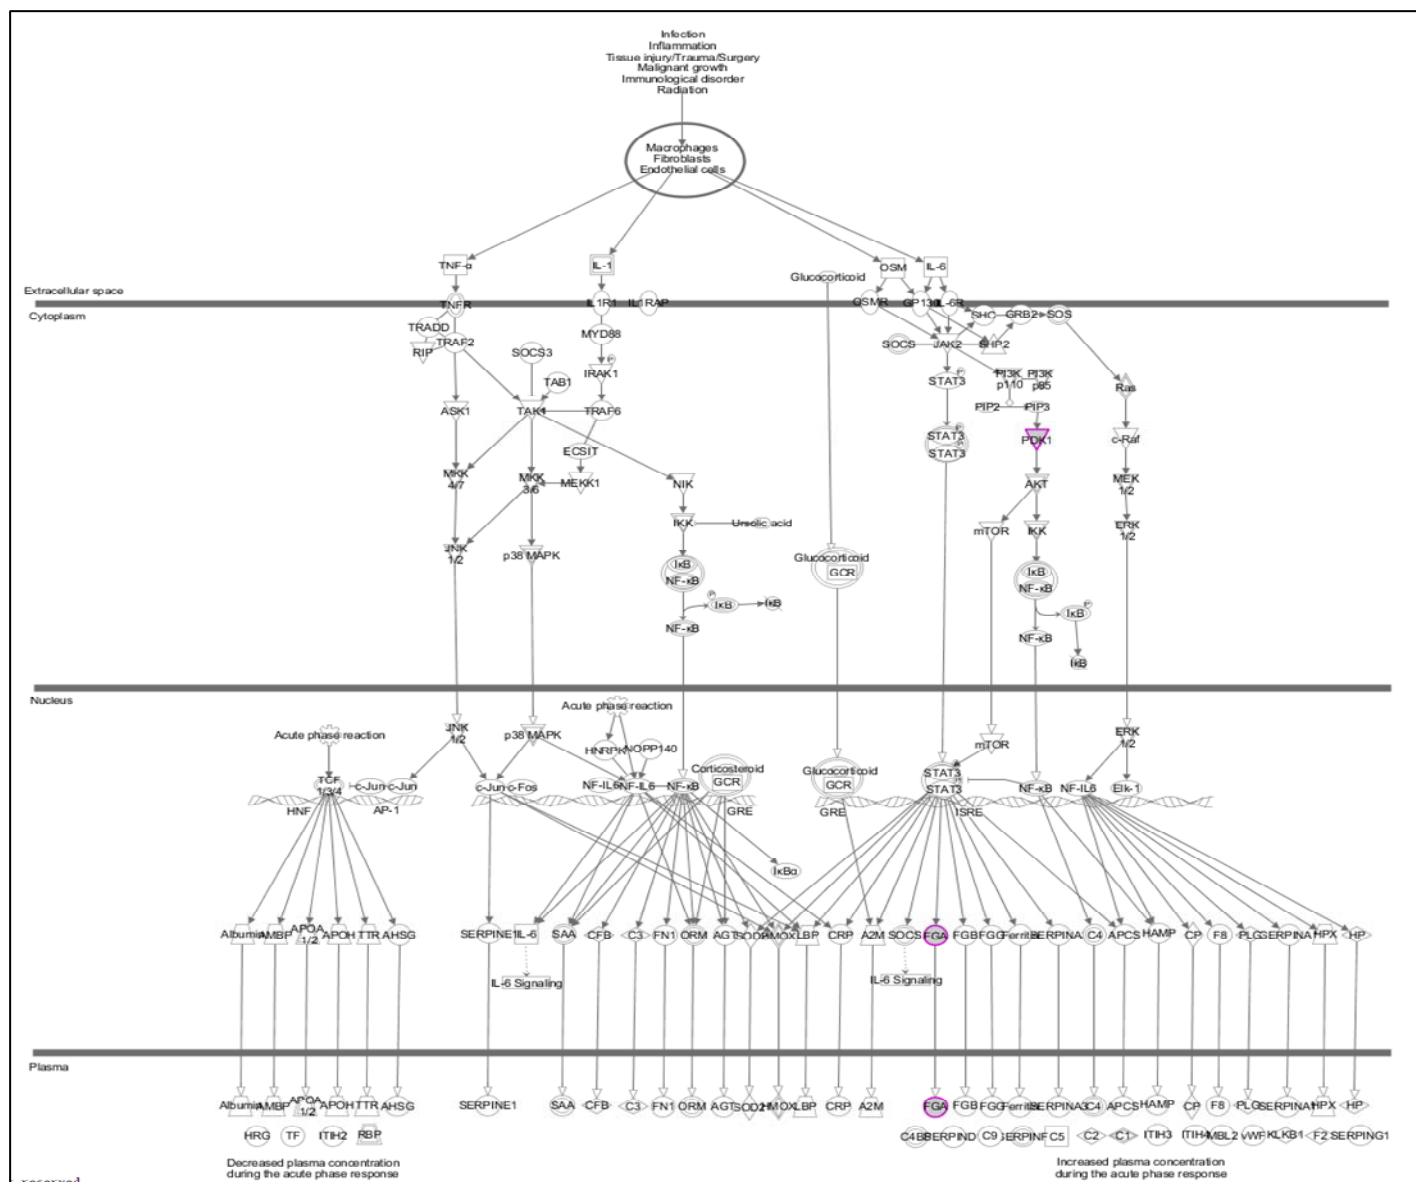

### 30-RAR activation

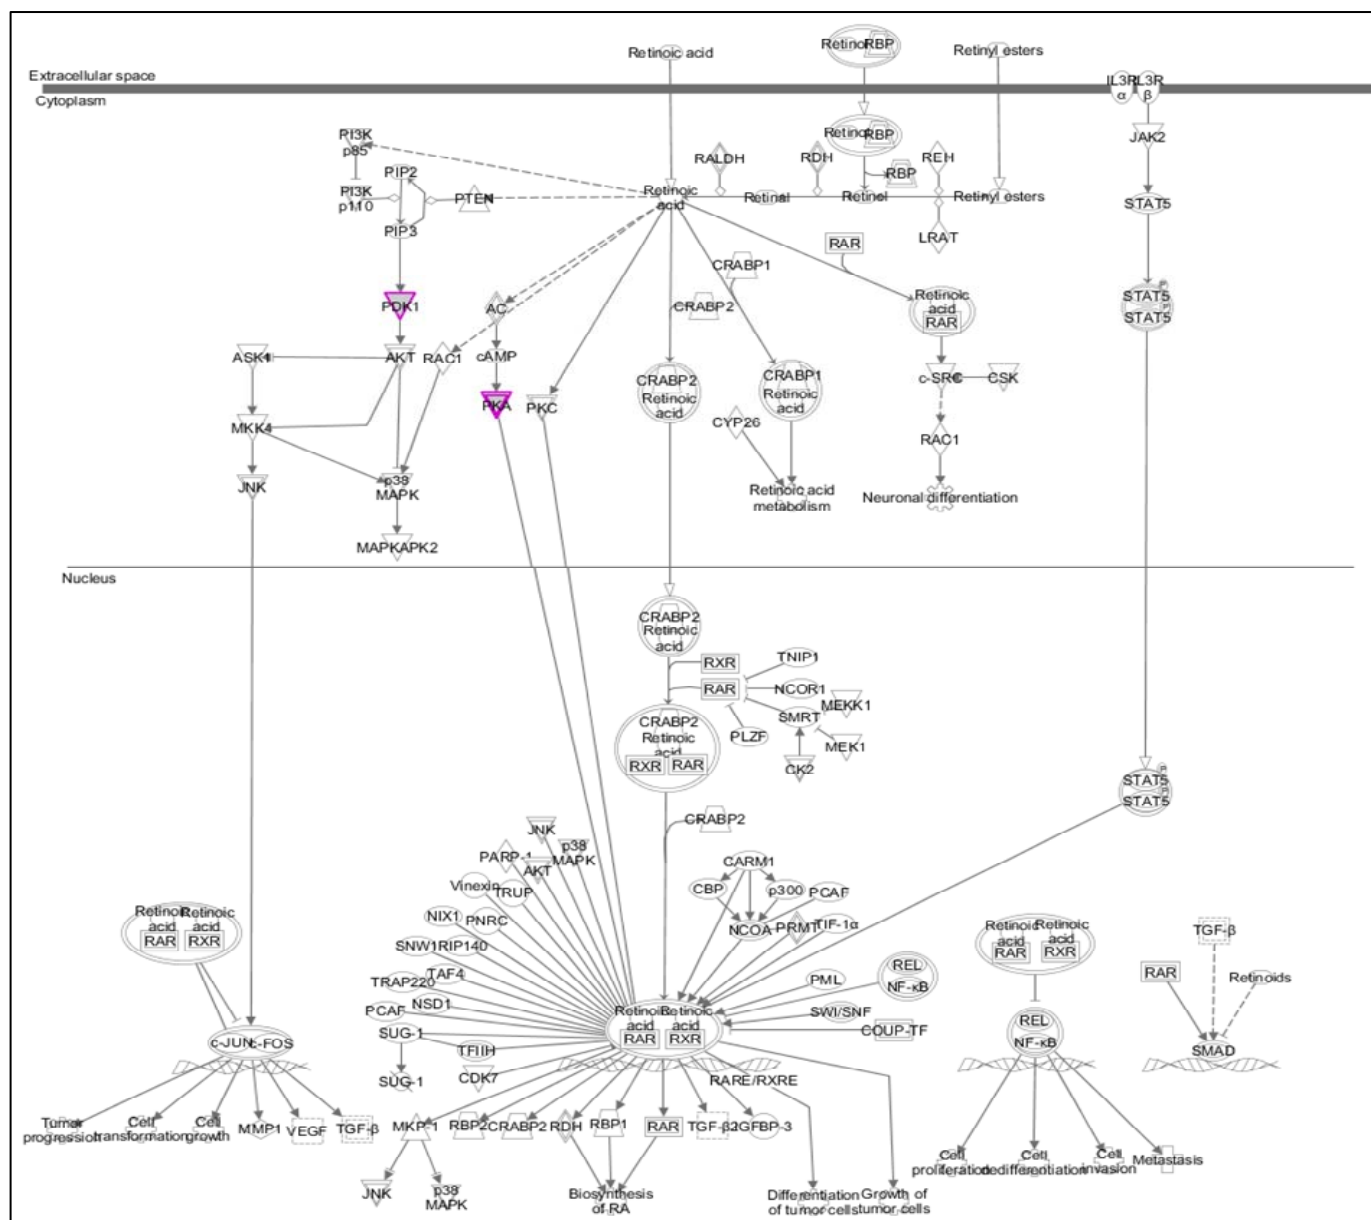

### 31-Extrinsic prothrombin activation pathway

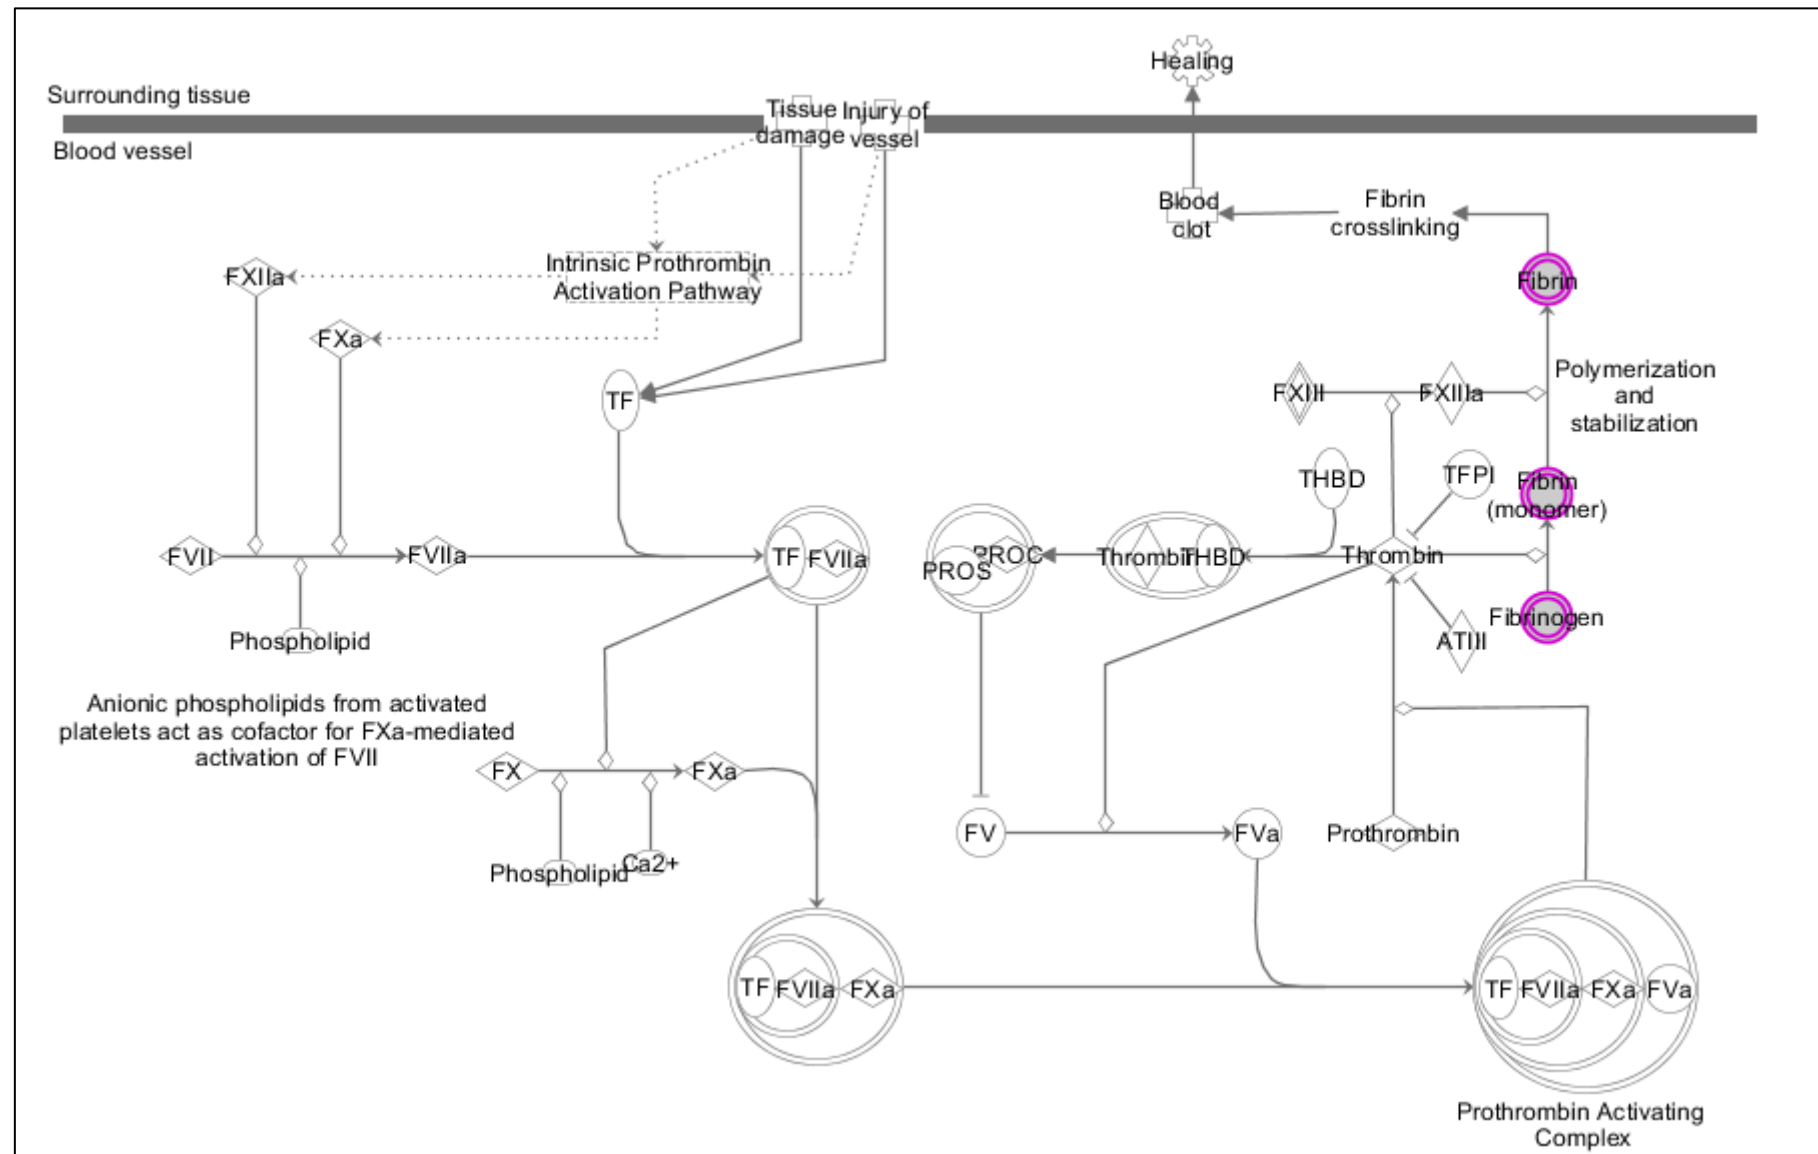

## 32-Sertoli cell-sertoli cell junction signaling

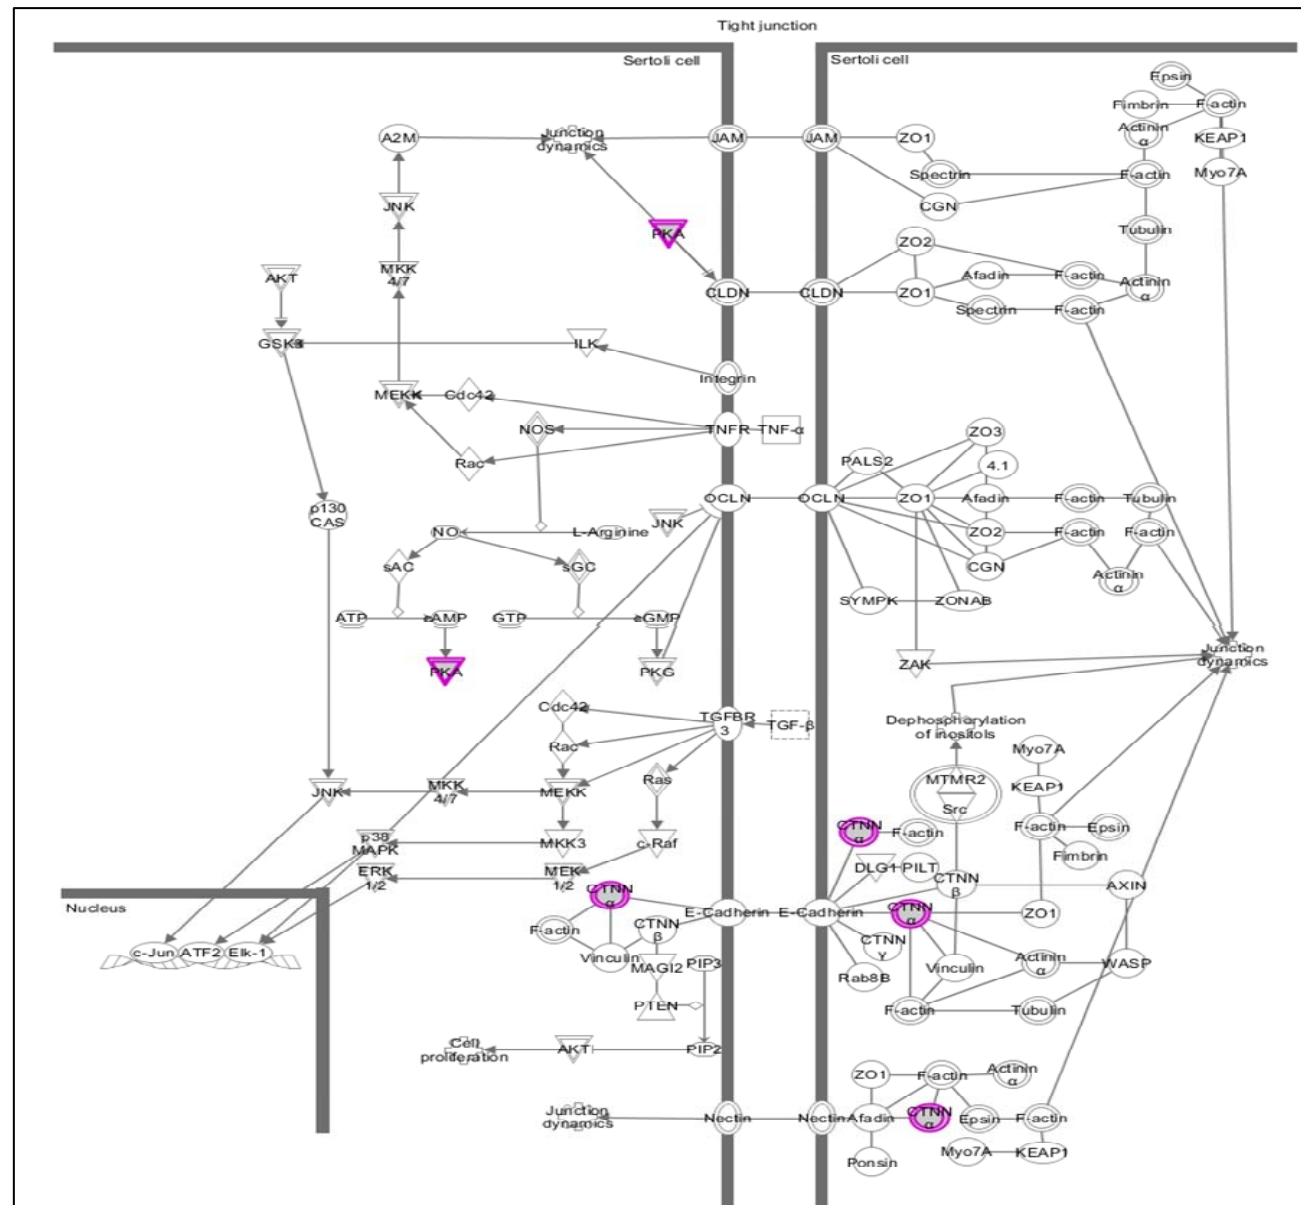

### 33-sucrose degradation V (mammalian)

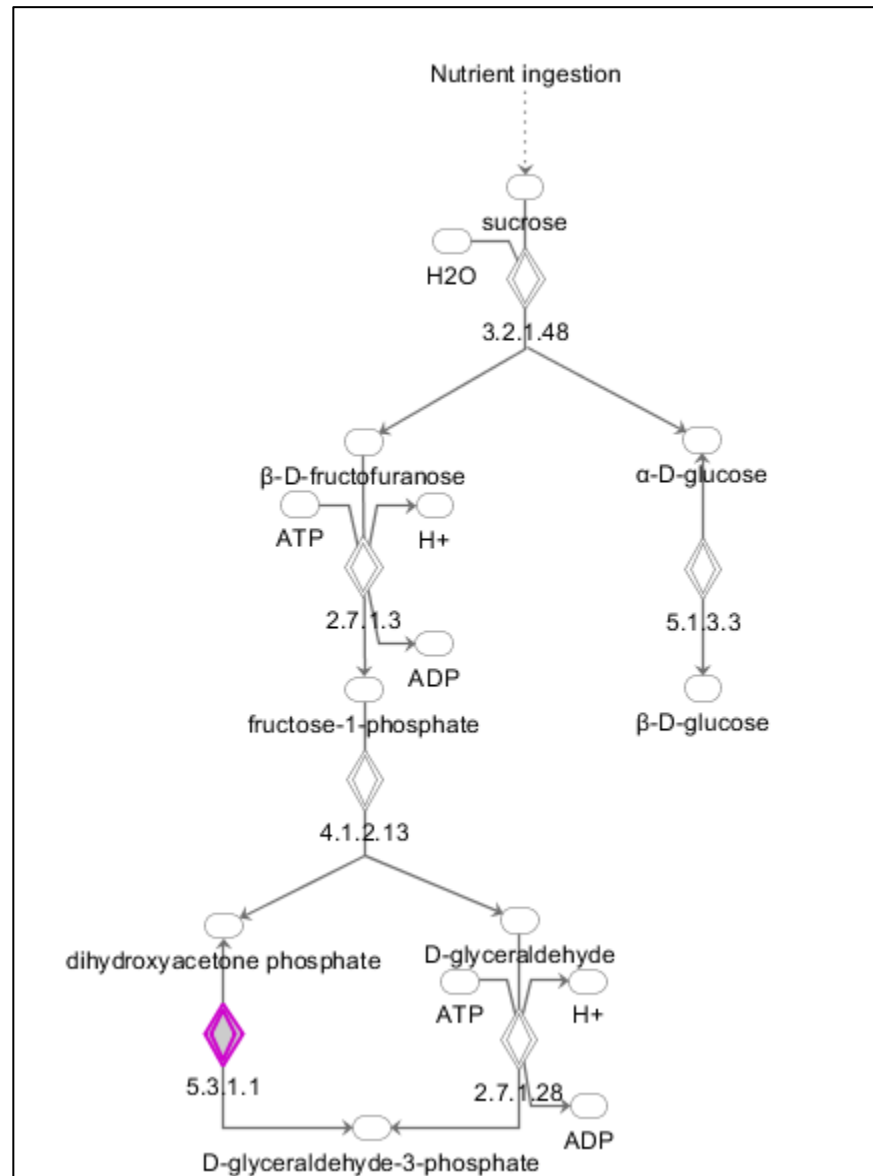

## 34-mTOR signaling

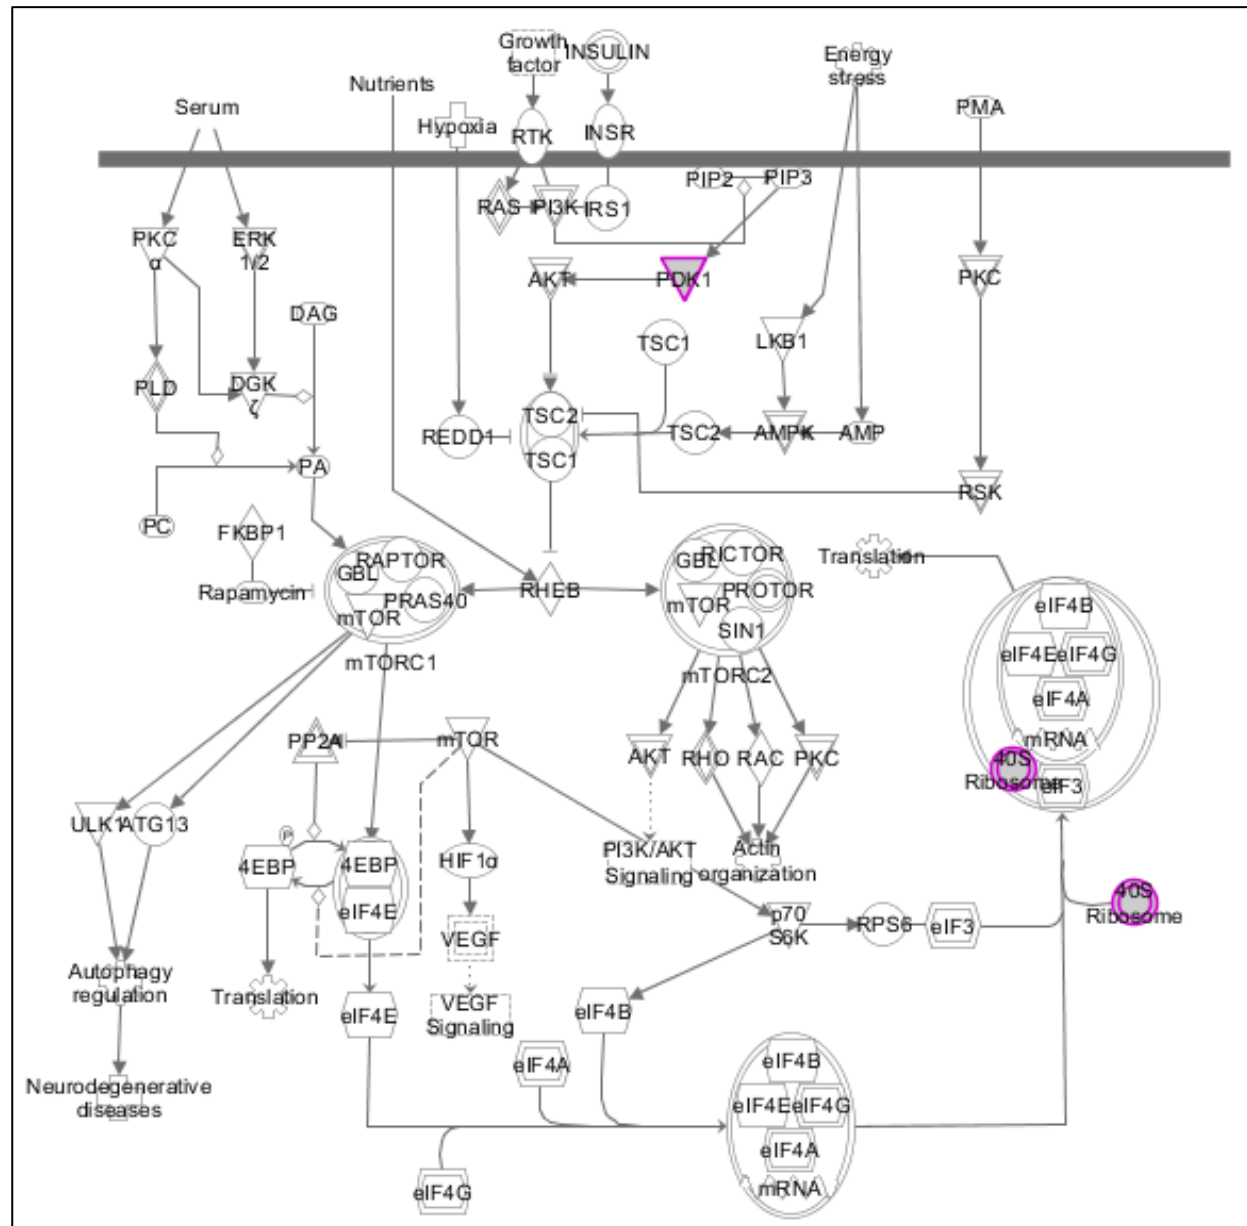

The diagram illustrates the pathogenesis of Huntington's disease (HD) across three cellular compartments: Extracellular space, Cytoplasm, and Nucleus.

**Extracellular space:** Shows HD protein aggregates and mHTT fragments.

**Cytoplasm:**

- HD aggregates:** Formed from HD protein, leading to mitochondrial dysfunction and endoplasmic reticulum stress.
- Endoplasmic reticulum stress:** Involves chaperones (BiP, GRP78, GRP94) and the unfolded protein response (UPR) pathway (PERK, IRE1, XBP1).
- Impaired endocytosis:** Shows reduced HD protein levels and impaired endocytosis of BDNF.
- Signaling pathways:** Includes PI3K/Akt/mTOR, JNK, and p38 pathways.
- Proteasome:** Involved in the degradation of mHTT aggregates.
- Autophagy:** Involved in the degradation of mHTT aggregates.
- Cell survival:** Regulated by mTOR and Akt.

**Nucleus:**

- HD aggregates:** Formed from HD protein, leading to transcriptional dysregulation and gene silencing.
- Transcriptional dysregulation:** Involves mHTT aggregates and the transcription factor p53.
- Gene silencing:** Involves mHTT aggregates and the transcription factor p53.
- Gene mutations associated with Huntington's disease:** HD protein aggregates and mHTT fragments.

### 36-Intrinsic prothrombin activation pathway

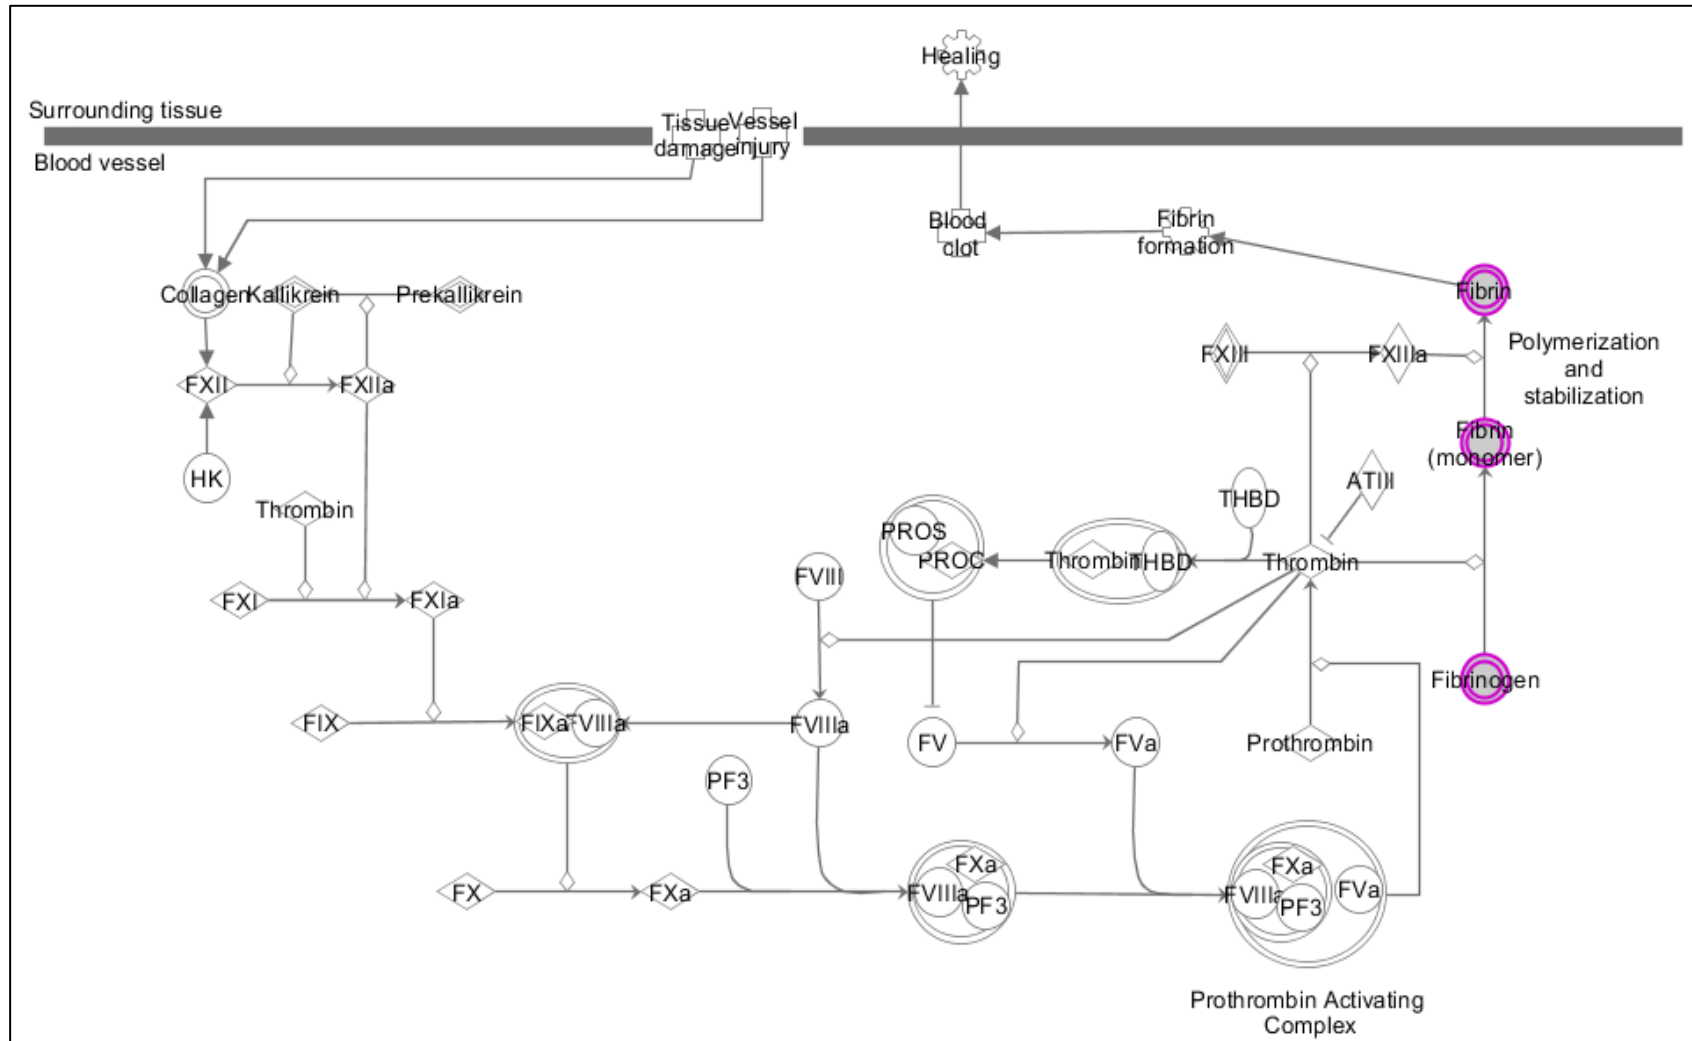

### 37-Sonic hedgehog signaling

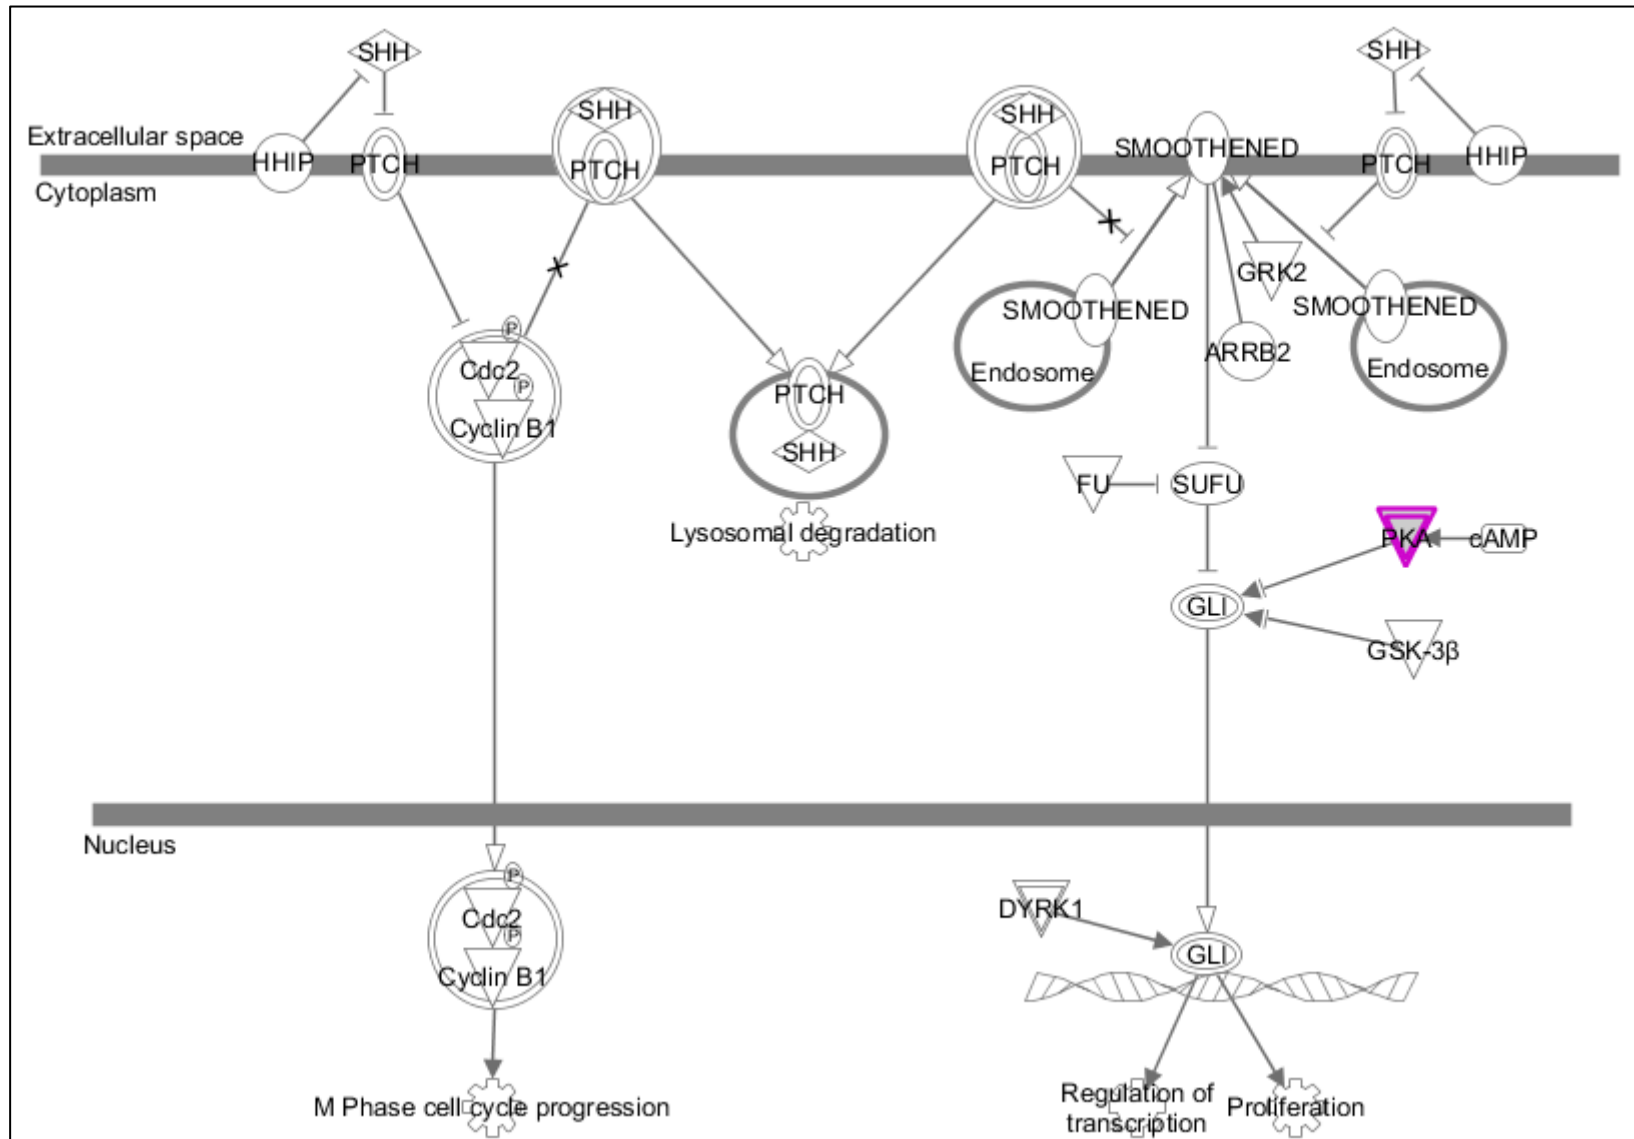

## 38-Protein ubiquitination pathway

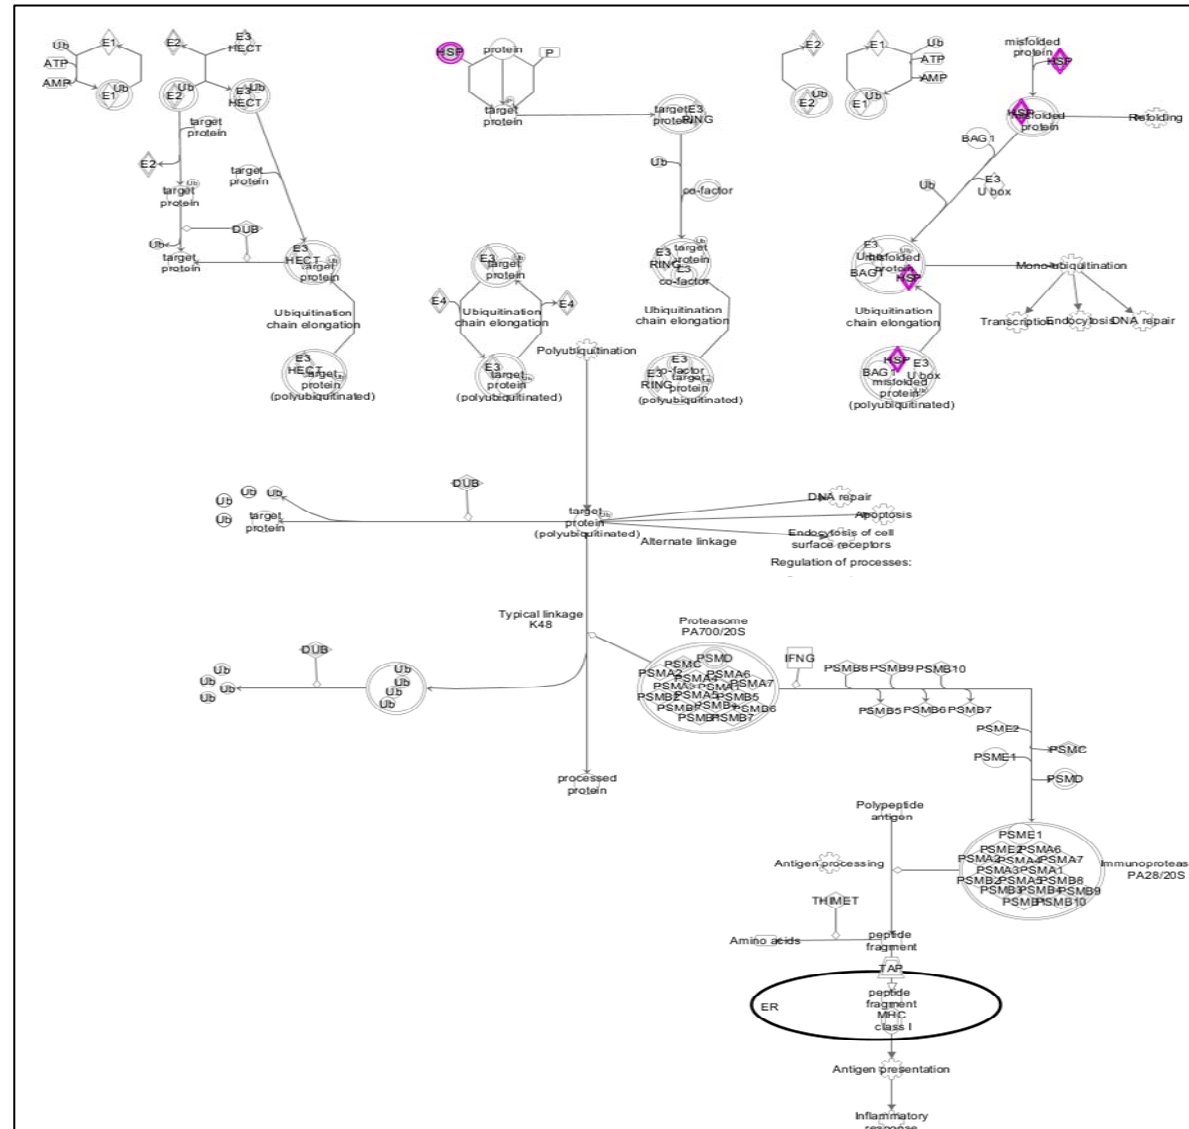

### 39-Coagulation system

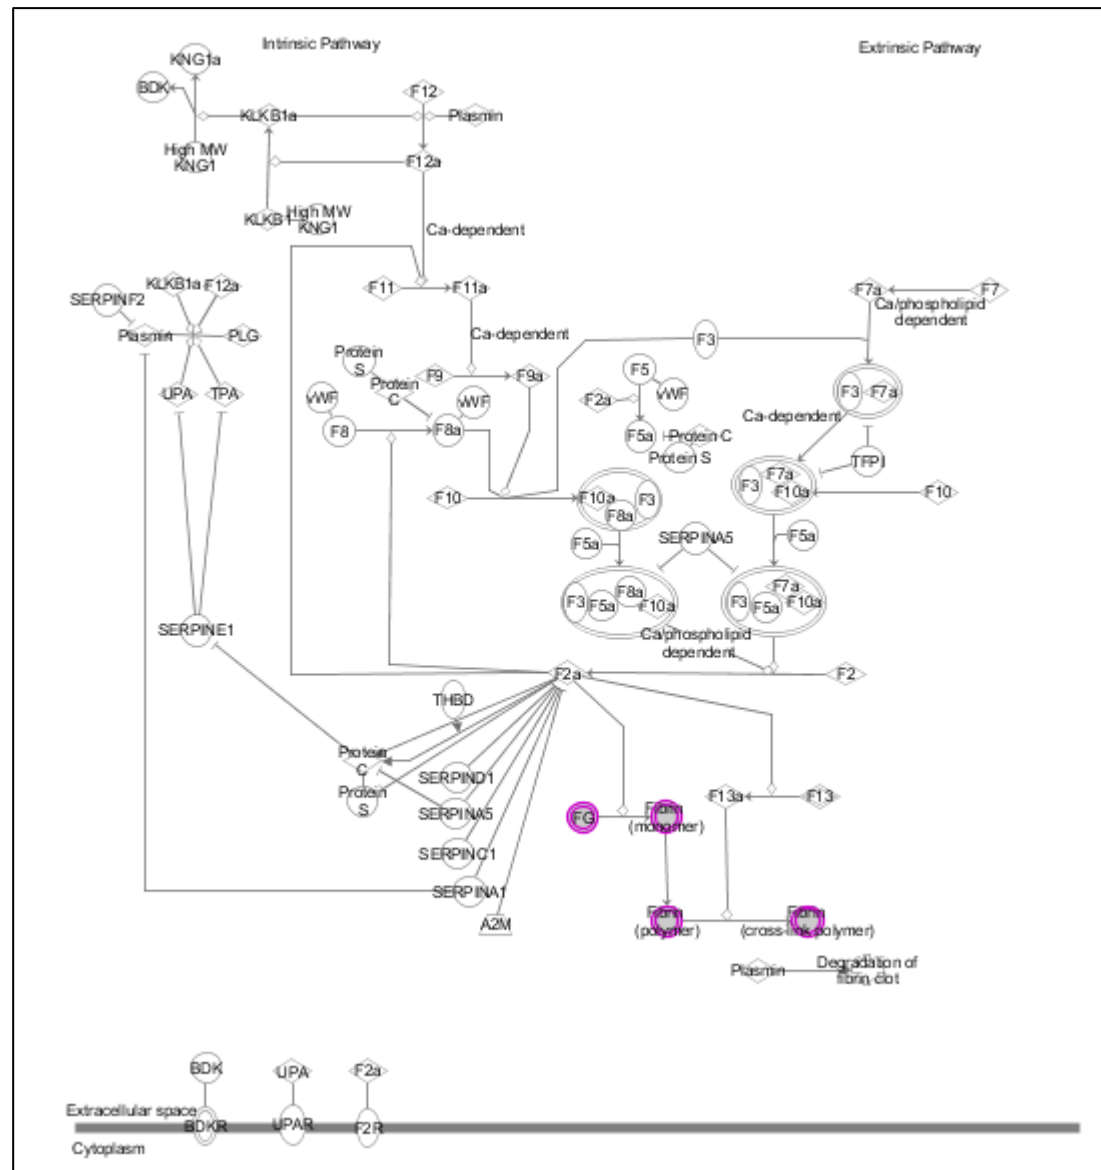

## 40-Role of JAK2 in hormone-like cytokine signaling

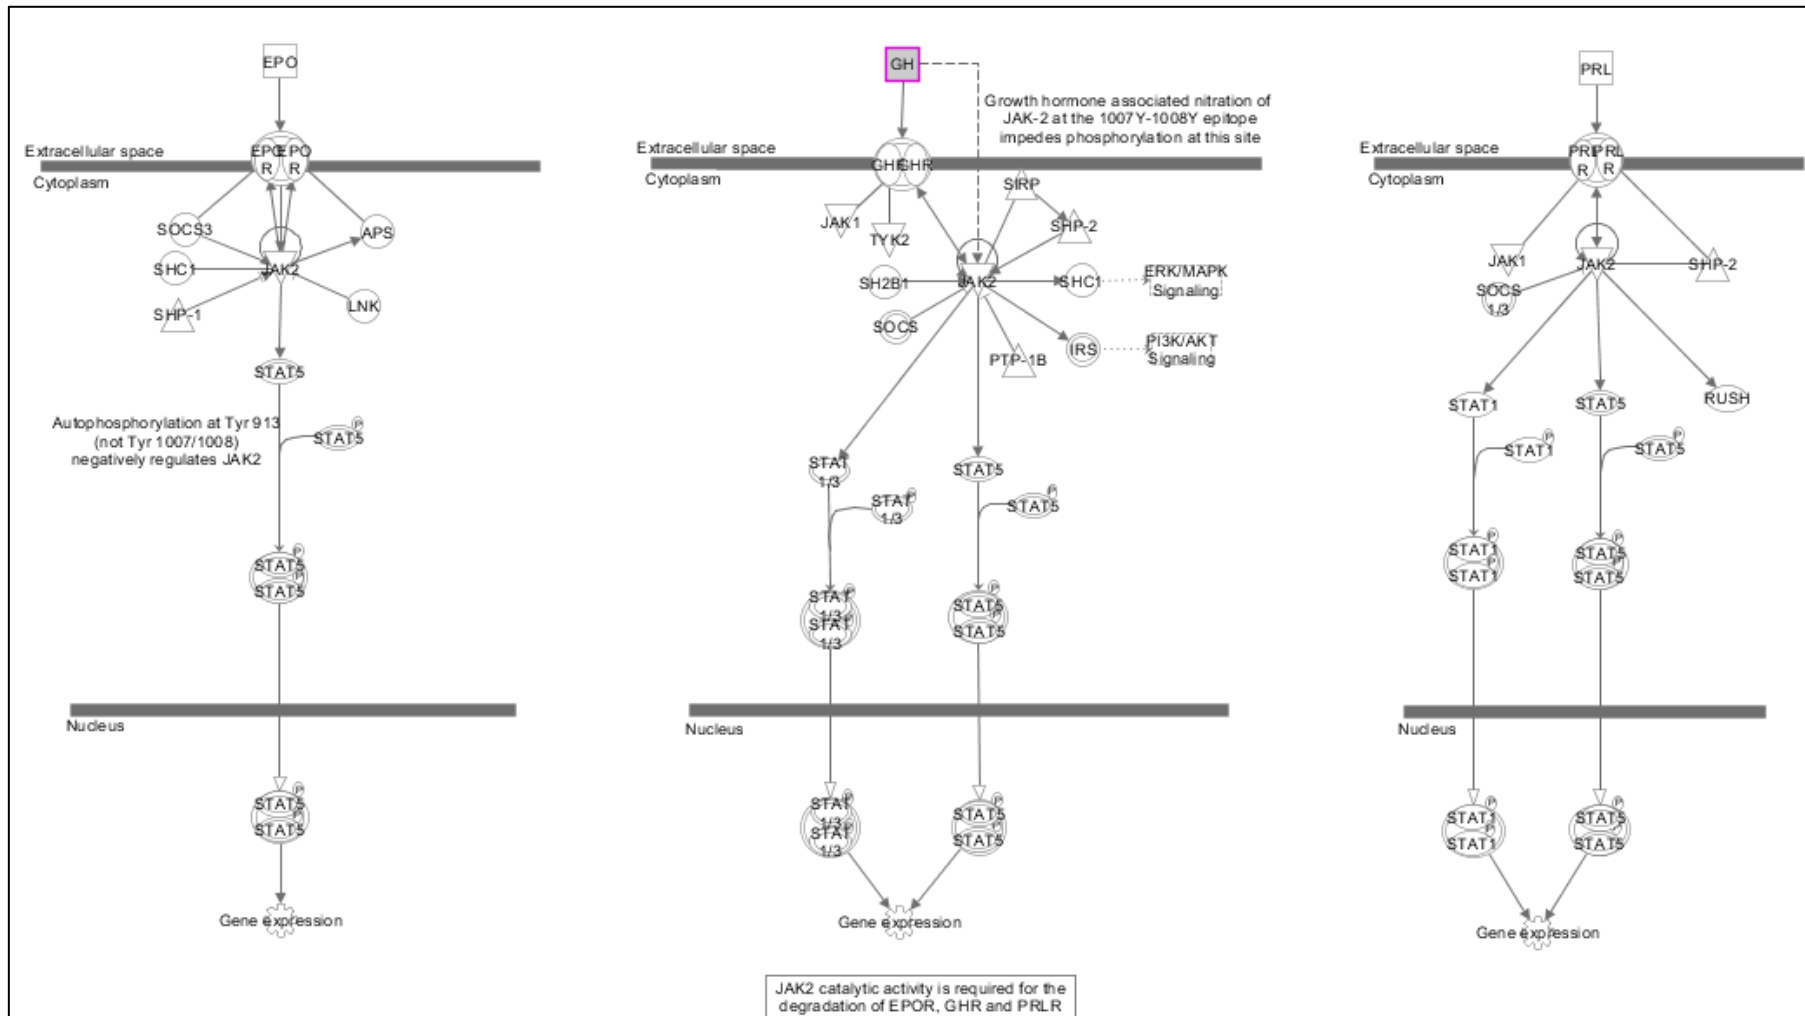

## 41-G-protein coupled receptor signaling

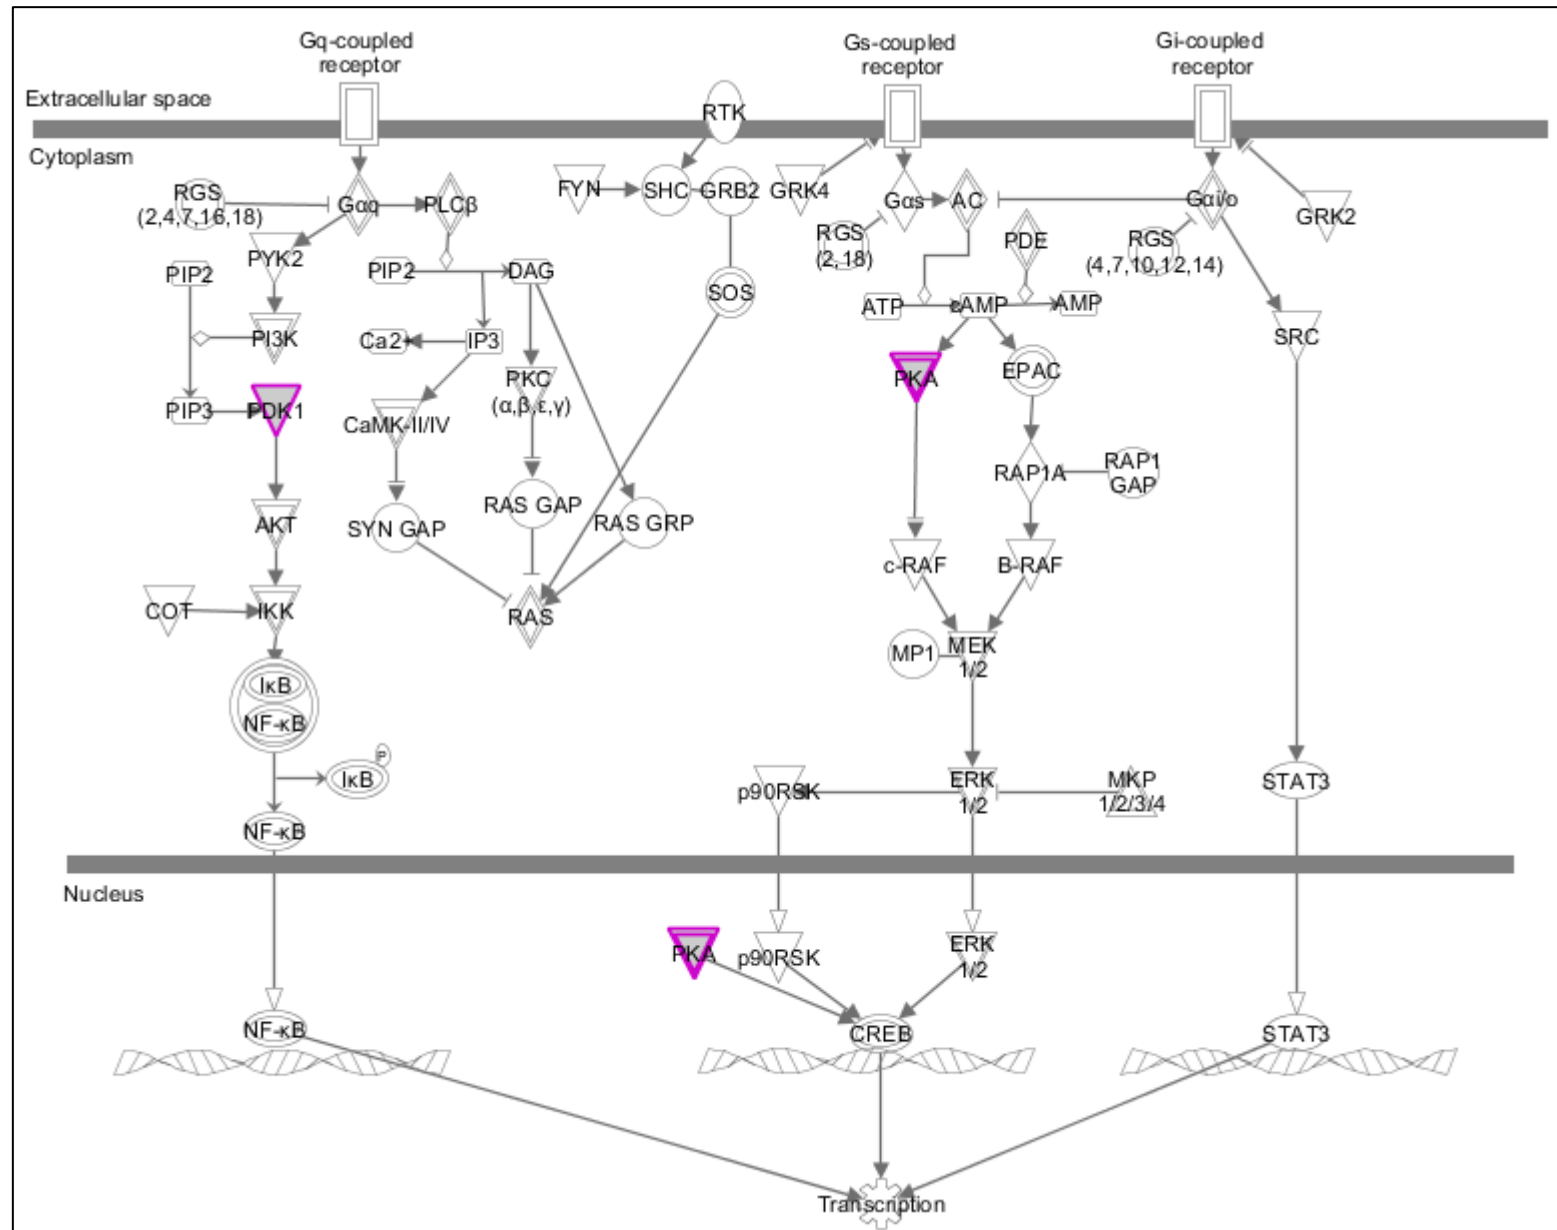

## 42-Xenobiotic metabolism signaling

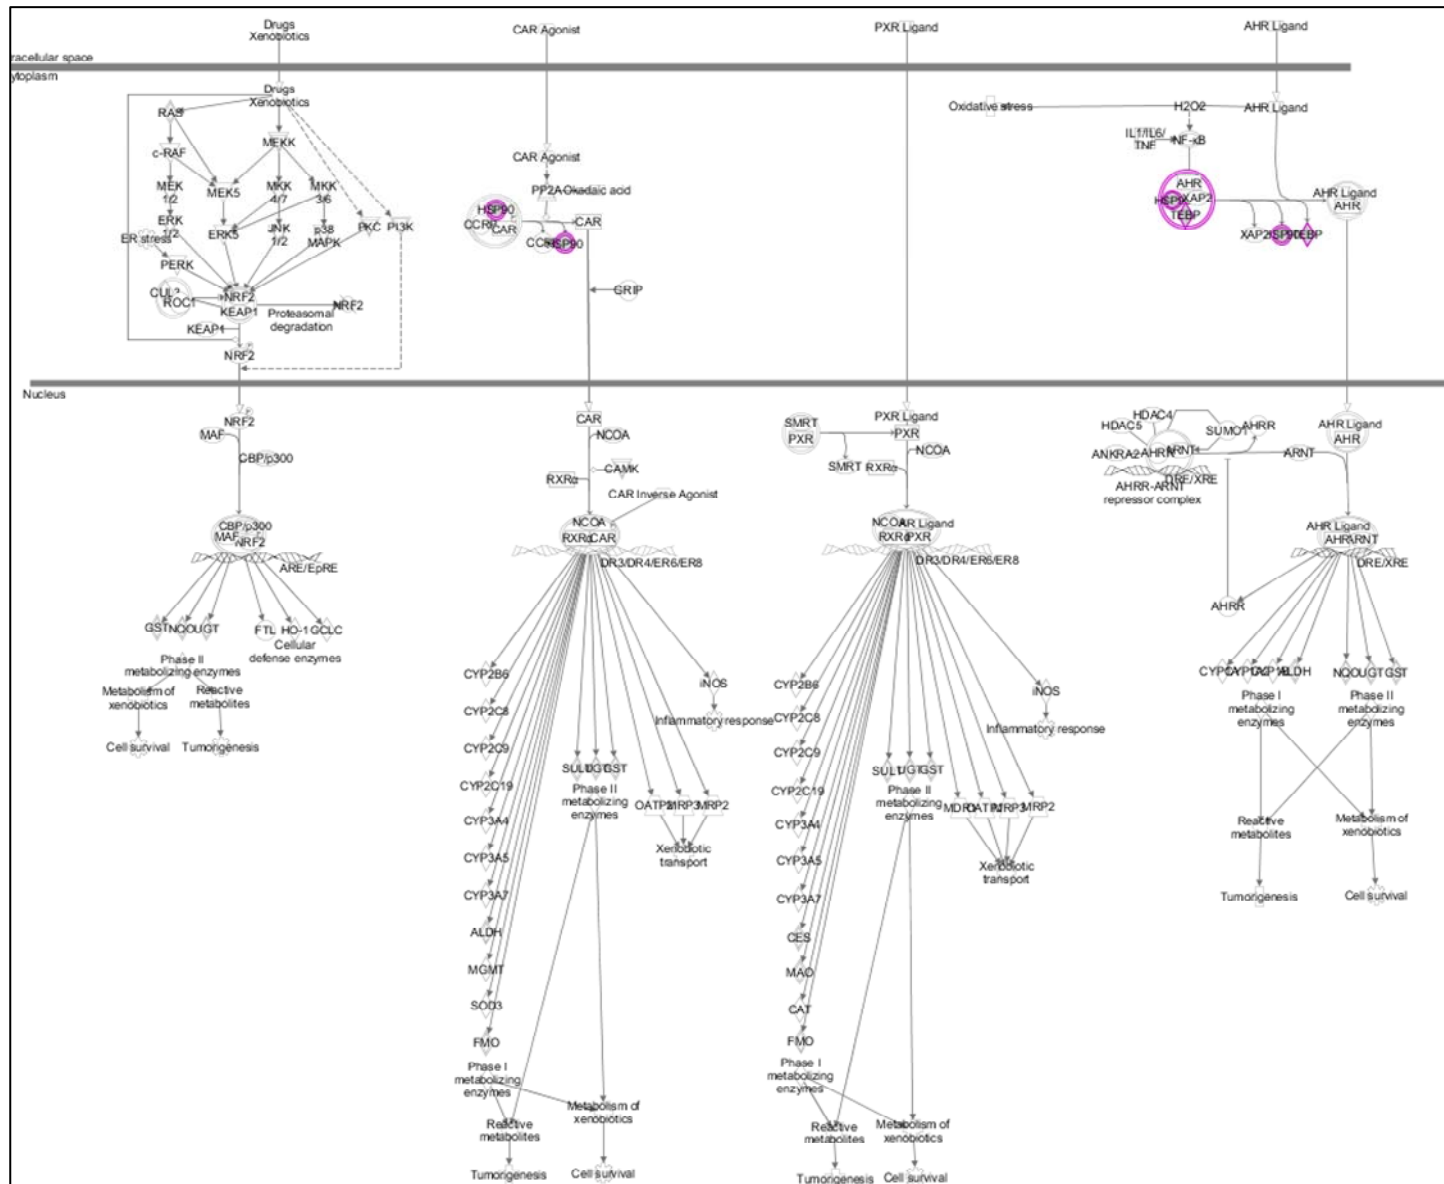

## 43-Glycolysis I

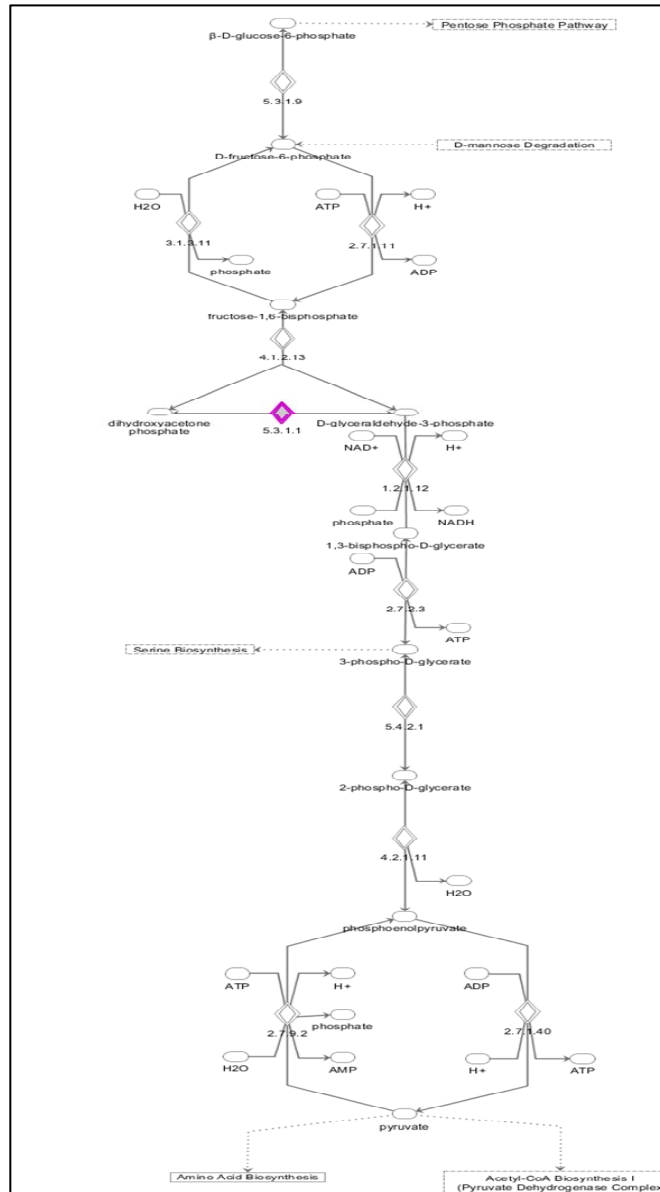

Supplement: Supplementary file 5 [file Presentation_5.zip › Supplemental materials 9.3.pdf]
