# Supplementary material for: Multiomics-Based Signaling Pathway Network Alterations in Human Non-functional Pituitary Adenomas
Source: Front Endocrinol (Lausanne). 2019 Dec 17;10:835. doi: 10.3389/fendo.2019.00835 (PMC6928143; doi:10.3389/fendo.2019.00835)
Supplement: Supplementary file 5 [file Presentation_5.zip]

Archive with 6 entries (6 files):
- Supplemental materials 8.2.ppt
- Supplemental materials 8.3.pdf
- Supplemental materials 9.1.pdf
- Supplemental materials 9.2.ppt
- Supplemental materials 9.3.pdf
- Supplemental materials 8.1.pdf
