# Supplementary material for: Multiomics-Based Signaling Pathway Network Alterations in Human Non-functional Pituitary Adenomas
Source: Front Endocrinol (Lausanne). 2019 Dec 17;10:835. doi: 10.3389/fendo.2019.00835 (PMC6928143; doi:10.3389/fendo.2019.00835)
Supplement: Supplementary file 5 [file Presentation_5.zip › Supplemental materials 8.1.pdf]

Supplemental materials 8.1 Nitroproteins from a pituitary control for IPA analysis (Dataset 8)

| ID     | Notes | Molecules | Description                                            | Location            | Familiy   | Drug |
|--------|-------|-----------|--------------------------------------------------------|---------------------|-----------|------|
| O60641 |       | SNAP91    | synaptosomal-associated protein, 91kDa                 | Plasma Membrane     | other     |      |
| P24071 |       | FCAR      | Fc fragment of IgA, receptor for                       | Plasma Membrane     | other     |      |
| ACTA2  | D     | ACTA2     | actin, alpha 2, smooth muscle, aorta                   | Cytoplasm           | other     |      |
| Q13237 |       | PRKG2     | protein kinase, cGMP-dependent, type II                | Cytoplasm           | kinase    |      |
| Q8IWL3 |       | HSCB      | HscB mitochondrial iron-sulfur cluster co-chaperone    | Cytoplasm           | other     |      |
| P52823 |       | STC1      | stanniocalcin 1                                        | Extracellular Space | kinase    |      |
| P25787 |       | PSMA2     | proteasome (prosome, macropain) subunit, alpha type, 2 | Cytoplasm           | peptidase |      |
| Q6TCH7 |       | PAQR3     | progesterin and adipoQ receptor family member III      | Cytoplasm           | other     |      |
| ACTG2  | D     | ACTG2     | actin, gamma 2, smooth muscle, enteric                 | Cytoplasm           | other     |      |
| ACTC1  |       | ACTC1     | actin, alpha, cardiac muscle 1                         | Cytoplasm           | enzyme    |      |
